# Supplementary material for: Three-component cascade carbopalladation/Heck cyclization/borylation: facile access to boryl-functionalized indenes
Source: Royal Society of Chemistry journal article supplement (doi:10.1039/d4cc02591a), 2024-01-01

## Supporting Information

# Three-component cascade carbopalladation/Heck cyclization/borylation: facile access to boryl-functionalized indenenes

Fei Sun,<sup>‡</sup> Yiyi Zheng,<sup>‡</sup> Mingxia Wu, Hongsen Ji, Zhongyao Jiang, Chenglin Liu, and Xin-Xing Wu\*

College of Chemistry and Chemical Engineering, Nantong University, Nantong 226019, P. R. China

Email: wuxinxng@163.com

<sup>‡</sup>F. S. and Y. Z. contributed equally.

### Table of Contents

|                                                                                     |         |
|-------------------------------------------------------------------------------------|---------|
| 1. General Considerations                                                           | S2      |
| 2. Preparation of Substrates                                                        | S2      |
| 3. Experiment Procedure                                                             | S2-S3   |
| 4. Scale-Up Reaction                                                                | S3      |
| 5. Synthetic transformations of <b>4a</b>                                           | S3-S4   |
| 6. Optimization of the reaction conditions with CH <sub>2</sub> (Bpin) <sub>2</sub> | S4      |
| 7. Spectra Data                                                                     | S5-S21  |
| 8. Crystallographic data of <b>4o</b> and <b>4i'</b>                                | S22-S23 |
| 9. References                                                                       | S24     |
| 10. NMR Spectra                                                                     | S25-S78 |

## 1. General Considerations

All reactions were carried out under N<sub>2</sub> atmosphere. Materials were obtained from commercial suppliers or prepared according to standard procedures unless otherwise noted. Solvents were purified and dried according to standard methods prior to use. For product purification by flash column chromatography, silica gel (200~300 mesh) and light petroleum ether (bp. 60~90) are used. <sup>1</sup>H NMR spectra were recorded on a Bruker advance III 400 MHz in CDCl<sub>3</sub> and <sup>13</sup>C{<sup>1</sup>H} NMR spectra were recorded on 101 MHz in CDCl<sub>3</sub> using TMS as internal standard. Data for <sup>1</sup>H NMR are recorded as follows: chemical shift (δ, ppm), multiplicity (s = singlet, d = doublet, t = triplet, m = multiplet or unresolved, br = broad singlet, dd = doublet of doublet, dt = triplet of doublets, ddd = doublet of doublet of doublets, coupling constant (s) in Hz, integration). Data for <sup>13</sup>C NMR is reported in terms of chemical shift (δ, ppm). IR spectra were recorded on a FT-IR spectrometer and only major peaks were reported in cm<sup>-1</sup>. High-resolution mass spectral analysis (HRMS) data were measured on a Bruker Apex II.

## 2. Preparation of Substrates

Substrates **1a-1l** were synthesized according to the known literature.<sup>1-5</sup> Substrates **2a-2n** were prepared from the corresponding terminal alkynes via Sonogashira coupling through the known literatures.<sup>6-8</sup> Substrates **3a-3c** were purchased commercially.

## 3. Experiment Procedure

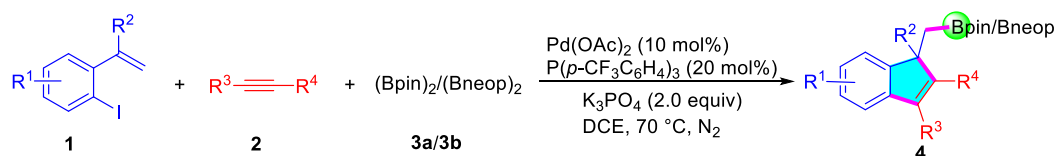

*O*-iodostyrenes **1** (0.2 mmol, 1.0 equiv), internal alkynes **2** (0.4 mmol, 2.0 equiv), boron reagent **3a** or **3b** (0.3 mmol, 1.5 equiv), Pd(OAc)<sub>2</sub> (10 mol%), P(*p*-CF<sub>3</sub>C<sub>6</sub>H<sub>4</sub>)<sub>3</sub> (20 mol%), K<sub>3</sub>PO<sub>4</sub> (0.4 mmol, 2.0 equiv) were added to a sealed tube, DCE (2.0 mL) were added via syringe. The mixture was flushed with N<sub>2</sub> and then heated at 70 °C in an oil bath about for 12 h until completion (monitored by TLC). After cooling at room temperature, the reaction mixture was filtered through celite. The solvent in the filtrate was evaporated under reduced pressure. The residue was purified through silica gel chromatography to afford the products **4**.

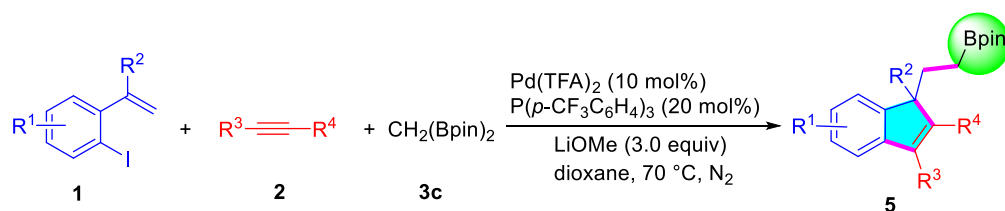

*O*-iodostyrenes **1** (0.2 mmol, 1.0 equiv), internal alkynes **2** (0.4 mmol, 2.0 equiv), *gem*-diborylmethane **3c** (0.4 mmol, 2.0 equiv), Pd(TFA)<sub>2</sub> (10 mol%), P(*p*-CF<sub>3</sub>C<sub>6</sub>H<sub>4</sub>)<sub>3</sub> (20 mol%), LiOMe (0.6 mmol, 3.0 equiv) were added to a sealed tube, dioxane (0.5 mL) were added via syringe. The mixture was flushed with N<sub>2</sub> and then heated at 70 °C in an oil bath about for 12 h until completion (monitored by TLC). After cooling at room temperature, the reaction mixture was filtered through celite. The solvent in the filtrate was evaporated under reduced pressure. The

residue was purified through silica gel chromatography to afford the products **5**.

#### 4. Gram-Scale Synthesis

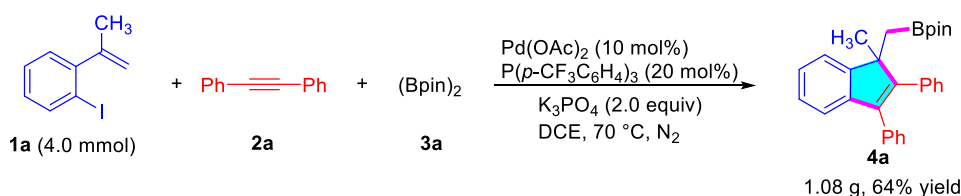

*O*-iodostyrene **1a** (4.0 mmol, 0.98 g, 1.0 equiv), internal alkyne **2a** (8.0 mmol, 1.42 g, 2.0 equiv), boron reagent **3a** (6.0 mmol, 1.52 g, 1.5 equiv), Pd(OAc)<sub>2</sub> (10 mol%, 89.6 mg), P(*p*-CF<sub>3</sub>C<sub>6</sub>H<sub>4</sub>)<sub>3</sub> (20 mol%, 373 mg), K<sub>3</sub>PO<sub>4</sub> (8.0 mmol, 1.70 g, 2.0 equiv) were added to a sealed tube, DCE (40 mL) were added via syringe. The mixture was flushed with N<sub>2</sub> and then heated at 70 °C in an oil bath about for 12 h until completion (monitored by TLC). After cooling at room temperature, the reaction mixture was filtered through celite. The solvent in the filtrate was evaporated under reduced pressure. The residue was purified through silica gel chromatography (petroleum ether/ethyl acetate = 20:1~10:1, v/v) to afford the product **4a**.

#### 5. Synthetic transformations of **4a**

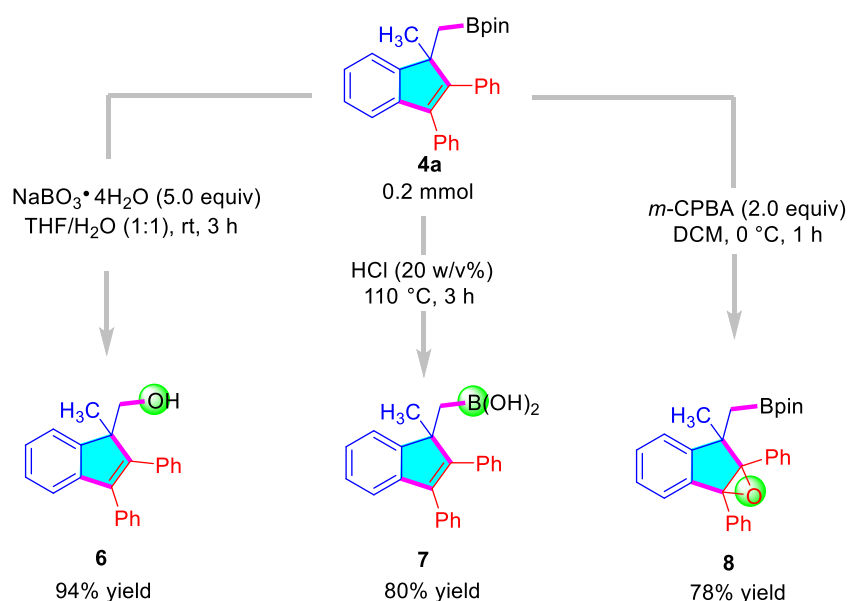

(1-methyl-2,3-diphenyl-1H-inden-1-yl)methanol (**6**) was synthesized according to the following procedure. A vial containing **4a** (1.0 equiv, 0.2 mmol, 84 mg) was charged with THF (1 mL) and H<sub>2</sub>O (1 mL), then NaBO<sub>3</sub>·4H<sub>2</sub>O (5.0 equiv, 1.0 mmol) was added in one portion. The reaction mixture was stirred at room temperature for 3 hours in open flask. The reaction was quenched with a saturated aqueous solution of NH<sub>4</sub>Cl. The aqueous layer was extracted for three times with EtOAc and separated organic layer was washed with brine, dried over Na<sub>2</sub>SO<sub>4</sub> and concentrated under reduced pressure. The crude product was purified by column chromatography on silica gel (petroleum ether/ethyl acetate = 10:1~1:1, v/v) afforded **6** as a colorless solid (59 mg, 94% yield).

((1-methyl-2,3-diphenyl-1H-inden-1-yl)methyl)boronic acid (**7**) was synthesized according to

the following procedure. A mixture of **4a** (1.0 equiv, 0.2 mmol, 84 mg) in 4 mL 20% HCl (w/v) was stirred at 110 °C for 3 hours. After complete consumption of starting material **4a**, the crude material was extracted with diethylether twice, and the organic layer was washed with brine, dried over Na<sub>2</sub>SO<sub>4</sub>, filtered and concentrated. The residue was purified by column chromatography on silica gel (petroleum ether/ethyl acetate = 5:1~2:1, v/v) to afford **7** as a colorless solid (54 mg, 80% yield).

4,4,5,5-tetramethyl-2-((6-methyl-1a,6a-diphenyl-1a,6a-dihydro-6H-indeno[1,2-b]oxiren-6-yl)methyl)-1,3,2-dioxaborolane (**8**) was synthesized according to the following procedure. To a solution of **4a** (1.0 equiv, 0.2 mmol, 84 mg) in DCM (2.0 mL) was added *m*-CPBA (0.4 mmol, 69.0 mg, 2.0 equiv) at 0 °C under air. Then the reaction mixture was allowed to room temperature, and stirred for 1 h. The reaction mixture was filtered through Celite. The solvent in the filtrate was evaporated under reduced pressure, and the crude product was purified by flash chromatography (petroleum ether/ethyl acetate = 10:1, v/v) to afford the pure epoxide product **8** as a colorless solid (68 mg, 78% yield).

## 6. Optimization of the reaction conditions with CH<sub>2</sub>(Bpin)<sub>2</sub><sup>a</sup>

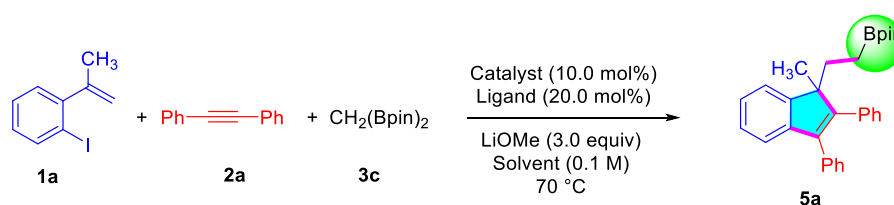

| Entry           | Catalyst                                            | Ligand                                                                     | Solvent | Yield <sup>b</sup> (%) |
|-----------------|-----------------------------------------------------|----------------------------------------------------------------------------|---------|------------------------|
| 1               | Pd(OAc) <sub>2</sub>                                | PPh <sub>3</sub>                                                           | dioxane | 21                     |
| 2               | Pd <sub>2</sub> (dba) <sub>3</sub>                  | PPh <sub>3</sub>                                                           | dioxane | <10                    |
| 3               | Pd(TFA) <sub>2</sub>                                | PPh <sub>3</sub>                                                           | dioxane | 39                     |
| 4               | [Pd(C <sub>3</sub> H <sub>5</sub> )Cl] <sub>2</sub> | PPh <sub>3</sub>                                                           | dioxane | 32                     |
| 5               | PdCl <sub>2</sub> (PPh <sub>3</sub> ) <sub>2</sub>  | PPh <sub>3</sub>                                                           | dioxane | 24                     |
| 6               | Pd(OAc) <sub>2</sub>                                | PPh <sub>3</sub>                                                           | MeCN    | 14                     |
| 7               | Pd(TFA) <sub>2</sub>                                | PPh <sub>3</sub>                                                           | DME     | 27                     |
| 8               | Pd(TFA) <sub>2</sub>                                | PPh <sub>3</sub>                                                           | DCE     | 36                     |
| 9               | Pd(TFA) <sub>2</sub>                                | PPh <sub>3</sub>                                                           | toluene | <10                    |
| 10              | Pd(TFA) <sub>2</sub>                                | PCy <sub>3</sub>                                                           | dioxane | 0                      |
| 11              | Pd(TFA) <sub>2</sub>                                | P( <i>p</i> -MeOC <sub>6</sub> H <sub>5</sub> ) <sub>3</sub>               | dioxane | 47                     |
| 12              | Pd(TFA) <sub>2</sub>                                | P(2-furyl) <sub>3</sub>                                                    | dioxane | 49                     |
| 13              | Pd(TFA) <sub>2</sub>                                | P( <i>p</i> -CF <sub>3</sub> OC <sub>6</sub> H <sub>5</sub> ) <sub>3</sub> | dioxane | 66                     |
| 14              | Pd(TFA) <sub>2</sub>                                | P( <i>p</i> -FC <sub>6</sub> H <sub>5</sub> ) <sub>3</sub>                 | dioxane | 50                     |
| 15              | Pd(TFA) <sub>2</sub>                                | DPPB                                                                       | dioxane | 0                      |
| 16              | Pd(TFA) <sub>2</sub>                                | DPEphos                                                                    | dioxane | 34                     |
| <sup>c</sup> 17 | Pd(TFA) <sub>2</sub>                                | P( <i>p</i> -CF <sub>3</sub> OC <sub>6</sub> H <sub>5</sub> ) <sub>3</sub> | dioxane | 72                     |
| <sup>d</sup> 18 | Pd(TFA) <sub>2</sub>                                | P( <i>p</i> -CF <sub>3</sub> OC <sub>6</sub> H <sub>5</sub> ) <sub>3</sub> | dioxane | 78                     |

<sup>a</sup>Reaction conditions: **1a** (0.2 mmol), **2a** (0.4 mmol), **3c** (0.4 mmol), catalyst (10 mol %), ligand (20 mol %), LiOMe (0.6 mmol), solvent (2.0 mL, 0.1 M), 70 °C, 12 h under N<sub>2</sub> conditions. <sup>b</sup>Isolated yields. <sup>c</sup>solvent (1.0 mL, 0.2 M), <sup>d</sup>solvent (0.5 mL, 0.4 M).



## 7. Spectra Data

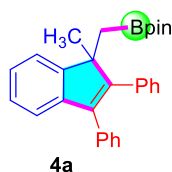

*4,4,5,5-tetramethyl-2-((1-methyl-2,3-diphenyl-1H-inden-1-yl)methyl)-1,3,2-dioxaborolane* (**4a**): Purification by column chromatography on silica gel (petroleum ether/ethyl acetate = 20:1~10:1, v/v) affords the title compound as a colorless solid, Mp = 92-94 °C, 61 mg, 72% yield. <sup>1</sup>H NMR (400 MHz, CDCl<sub>3</sub>) δ 7.46-7.41 (m, 1H), 7.25-7.06 (m, 13H), 1.33 (d, *J* = 20.9 Hz, 5H), 0.86 (s, 12H). <sup>13</sup>C{<sup>1</sup>H} NMR (101 MHz, CDCl<sub>3</sub>) δ 153.1, 152.7, 143.5, 138.1, 137.1, 135.6, 130.4, 129.6, 128.0, 127.9, 126.8, 126.7, 126.5, 125.2, 122.3, 120.3, 82.7, 52.8, 26.2, 24.7. IR(neat) 3430, 2976, 1507, 1377, 1239, 803, 531. HRMS (ESI-TOF) calcd for C<sub>29</sub>H<sub>32</sub>BO<sub>2</sub> [M+H]<sup>+</sup> : 423.2490, found: 423.2492.

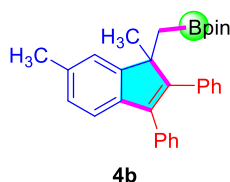

*2-((1,6-dimethyl-2,3-diphenyl-1H-inden-1-yl)methyl)-4,4,5,5-tetramethyl-1,3,2-dioxaborolane* (**4b**): Purification by column chromatography on silica gel (petroleum ether/ethyl acetate = 20:1~10:1, v/v) affords the title compound as a brown viscous oil, 56 mg, 64% yield. <sup>1</sup>H NMR (400 MHz, CDCl<sub>3</sub>) δ 7.28 (s, 1H), 7.23-7.09 (m, 11H), 6.96 (dd, *J* = 7.9, 1.6 Hz, 1H), 2.34 (s, 3H), 1.36 (s, 3H), 1.27-1.20 (m, 2H), 0.90 (d, *J* = 3.2 Hz, 12H). <sup>13</sup>C{<sup>1</sup>H} NMR (101 MHz, CDCl<sub>3</sub>) δ 152.9, 152.3, 140.9, 137.2, 135.9, 134.8, 130.5, 129.6, 128.0, 127.9, 127.1, 126.68, 126.66, 123.3, 120.1, 82.7, 52.6, 26.1, 24.8, 24.7, 21.7. IR(neat) 3437, 2980, 1617, 1351, 1329, 1140, 969, 819, 698. HRMS (ESI-TOF) calcd for C<sub>30</sub>H<sub>34</sub>BO<sub>2</sub> [M+H]<sup>+</sup> : 437.2646, found: 437.2646.

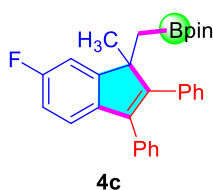

*2-((6-fluoro-1-methyl-2,3-diphenyl-1H-inden-1-yl)methyl)-4,4,5,5-tetramethyl-1,3,2-dioxaborolane* (**4c**): Purification by column chromatography on silica gel (petroleum ether/ethyl acetate = 20:1~10:1, v/v) affords the title compound as a colorless solid, Mp = 100-102 °C, 61 mg, 69% yield. <sup>1</sup>H NMR (400 MHz, CDCl<sub>3</sub>) δ 7.27-7.04 (m, 12H), 6.84 (ddd, *J* = 9.3, 8.3, 2.4 Hz, 1H), 1.37-1.25 (m, 5H), 0.93 (d, *J* = 2.1 Hz, 12H). <sup>13</sup>C{<sup>1</sup>H} NMR (101 MHz, CDCl<sub>3</sub>) δ 161.9 (d, *J* = 244.1 Hz), 155.0 (d, *J* = 7.6 Hz), 152.9 (d, *J* = 4.3 Hz), 139.3 (d, *J* = 2.2 Hz), 137.2, 136.8, 135.4, 130.4, 129.5, 128.1, 128.0, 126.9 (d, *J* = 1.2 Hz), 121.0 (d, *J* = 8.6 Hz), 113.1 (d, *J* = 22.5 Hz), 110.2 (d, *J* = 23.1 Hz), 82.9, 52.9 (d, *J* = 2.1 Hz), 26.0, 24.8. <sup>19</sup>F NMR (376 MHz, CDCl<sub>3</sub>) δ -117.76. IR(neat) 3442, 2974, 1596, 1476, 1333, 1139, 815, 702. HRMS (ESI-TOF) calcd for C<sub>29</sub>H<sub>31</sub>FBO<sub>2</sub> [M+H]<sup>+</sup> : 441.2396, found: 441.2399.

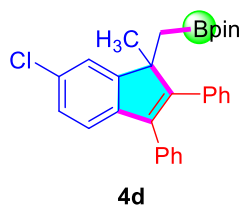

2-((6-chloro-1-methyl-2,3-diphenyl-1H-inden-1-yl)methyl)-4,4,5,5-tetramethyl-1,3,2-dioxaborolane (**4d**): Purification by column chromatography on silica gel (petroleum ether/ethyl acetate = 20:1~10:1, v/v) affords the title compound as a brown viscous oil, 53 mg, 58% yield. <sup>1</sup>H NMR (400 MHz, CDCl<sub>3</sub>) δ 7.46 (t, *J* = 1.2 Hz, 1H), 7.19-7.09 (m, 12H), 1.38-1.23 (m, 5H), 0.94 (d, *J* = 2.7 Hz, 12H). <sup>13</sup>C{<sup>1</sup>H} NMR (101 MHz, CDCl<sub>3</sub>) δ 154.6, 153.7, 142.0, 137.3, 136.5, 135.1, 131.1, 130.3, 129.5, 128.2, 128.0, 127.0, 126.6, 123.0, 121.2, 82.9, 52.9, 25.7, 24.83, 24.76. IR(neat) 3439, 2971, 1651, 1398, 1127, 708, 620. HRMS (ESI-TOF) calcd for C<sub>29</sub>H<sub>31</sub>ClBO<sub>2</sub> [M+H]<sup>+</sup> : 457.2100, found: 457.2102.

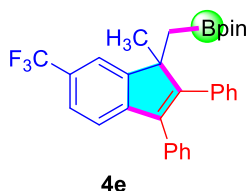

2-((1-(difluoro-1,3-methyl-1,2-fluoranyl)-1-methyl-2,3-diphenyl-1H-inden-1-yl)methyl)-4,4,5,5-tetramethyl-1,3,2-dioxaborolane (**4e**): Purification by column chromatography on silica gel (petroleum ether/ethyl acetate = 20:1~5:1, v/v) affords the title compound as a yellow oil, 65 mg, 66% yield. <sup>1</sup>H NMR (400 MHz, CDCl<sub>3</sub>) δ 7.74 (d, *J* = 1.7 Hz, 1H), 7.41 (dd, *J* = 8.0, 1.6 Hz, 1H), 7.28 (d, *J* = 8.0 Hz, 1H), 7.15 (tt, *J* = 8.3, 4.5 Hz, 10H), 1.39 (s, 3H), 1.23-1.17 (m, 2H), 0.91 (d, *J* = 2.7 Hz, 12H). <sup>13</sup>C{<sup>1</sup>H} NMR (101 MHz, CDCl<sub>3</sub>) δ 156.4, 153.2, 147.0 (d, *J* = 1.6 Hz), 137.4, 136.3, 135.3 (t, *J* = 6.4 Hz), 134.8, 130.1, 129.4, 128.2, 128.1, 127.3, 127.2 (d, *J* = 4.7 Hz), 127.0, 123.9 (dd, *J* = 7.8, 3.8 Hz), 120.3, 119.5 (dd, *J* = 7.6, 3.8 Hz), 83.0, 53.1, 25.4, 24.75, 24.74. <sup>19</sup>F NMR (376 MHz, CDCl<sub>3</sub>) δ -61.22. IR(neat) 3422, 2978, 1798, 1613, 1533, 1330, 1105, 1063, 699. HRMS (ESI-TOF) calcd for C<sub>30</sub>H<sub>31</sub>F<sub>3</sub>BO<sub>2</sub> [M+H]<sup>+</sup> : 491.2364, found: 491.2360.

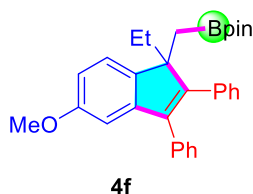

2-((1-ethyl-5-methoxy-2,3-diphenyl-1H-inden-1-yl)methyl)-4,4,5,5-tetramethyl-1,3,2-dioxaborolane (**4f**): Purification by column chromatography on silica gel (petroleum ether/ethyl acetate = 20:1~5:1, v/v) affords the title compound as a colorless solid, Mp = 93-95 °C, 69 mg, 74% yield. <sup>1</sup>H NMR (400 MHz, CDCl<sub>3</sub>) δ 7.28-7.07 (m, 11H), 6.80-6.67 (m, 2H), 3.71 (s, 3H), 1.84 (ddp, *J* = 21.0, 14.2, 7.3 Hz, 2H), 1.32 (q, *J* = 14.7 Hz, 2H), 0.88 (s, 12H), 0.49 (t, *J* = 7.3 Hz, 3H). <sup>13</sup>C{<sup>1</sup>H} NMR (101 MHz, CDCl<sub>3</sub>) δ 159.0, 151.6, 146.1, 143.0, 140.1, 137.2, 135.8, 130.1, 129.7, 128.1, 127.9, 126.8, 126.7, 122.8, 110.6, 106.1, 82.7, 56.6, 55.7, 32.2, 24.8, 8.8. IR(neat) 3421, 2974, 1604, 1479,

1358, 1324, 1141, 847, 702. HRMS (ESI-TOF) calcd for C<sub>31</sub>H<sub>36</sub>BO<sub>3</sub> [M+H]<sup>+</sup> : 467.2752, found: 467.2752.

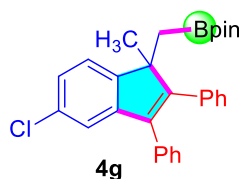

2-((5-chloro-1-methyl-2,3-diphenyl-1H-inden-1-yl)methyl)-4,4,5,5-tetramethyl-1,3,2-dioxaborolane (**4g**): Purification by column chromatography on silica gel (petroleum ether/ethyl acetate = 20:1~10:1, v/v) affords the title compound as a yellow viscous oil, 50 mg, 55% yield. <sup>1</sup>H NMR (400 MHz, CDCl<sub>3</sub>) δ 7.35 (d, *J* = 7.9 Hz, 1H), 7.28-7.02 (m, 12H), 1.39-1.27 (m, 5H), 0.90 (d, *J* = 2.3 Hz, 12H). <sup>13</sup>C{<sup>1</sup>H} NMR (101 MHz, CDCl<sub>3</sub>) δ 154.8, 151.0, 145.4, 136.5, 134.9, 132.4, 130.2, 129.5, 128.2, 128.0, 127.1, 127.0, 125.0, 123.4, 120.5, 82.9, 52.6, 26.1, 24.8, 24.7. IR(neat) 3435, 2911, 1769, 1533, 1469, 1377, 1303, 1131, 896, 717. HRMS (ESI-TOF) calcd for C<sub>29</sub>H<sub>31</sub>BClO<sub>2</sub> [M+H]<sup>+</sup> : 457.2100, found: 457.2104.

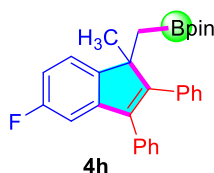

2-((5-fluoro-1-methyl-2,3-diphenyl-1H-inden-1-yl)methyl)-4,4,5,5-tetramethyl-1,3,2-dioxaborolane (**4h**): Purification by column chromatography on silica gel (petroleum ether/ethyl acetate = 20:1~10:1, v/v) affords the title compound as a yellow solid, Mp = 110-112 °C, 54 mg, 61% yield. <sup>1</sup>H NMR (400 MHz, CDCl<sub>3</sub>) δ 7.35 (dd, *J* = 8.2, 5.1 Hz, 1H), 7.22-7.07 (m, 10H), 6.91 (dd, *J* = 9.5, 2.5 Hz, 1H), 6.87-6.81 (m, 1H), 1.31 (d, *J* = 17.1 Hz, 5H), 0.89 (d, *J* = 2.3 Hz, 12H). <sup>13</sup>C{<sup>1</sup>H} NMR (101 MHz, CDCl<sub>3</sub>) δ 162.6 (d, *J* = 242.4 Hz), 155.1, 148.0 (d, *J* = 2.4 Hz), 145.5 (d, *J* = 8.6 Hz), 137.5 (d, *J* = 3.0 Hz), 136.7, 135.1, 130.2, 129.4, 128.2, 128.0, 127.01, 126.98, 123.1 (d, *J* = 9.0 Hz), 111.6 (d, *J* = 22.8 Hz), 107.5 (d, *J* = 23.5 Hz), 82.8, 52.4, 26.3, 24.8, 24.7. <sup>19</sup>F NMR (376 MHz, CDCl<sub>3</sub>) δ -117.01. IR(neat) 3435, 2976, 1612, 1469, 1329, 1138, 887, 732. HRMS (ESI-TOF) calcd for C<sub>29</sub>H<sub>31</sub>FBO<sub>2</sub> [M+H]<sup>+</sup> : 441.2396, found: 441.2397.

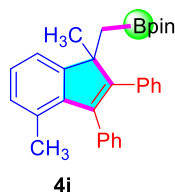

2-((1,4-dimethyl-2,3-diphenyl-1H-inden-1-yl)methyl)-4,4,5,5-tetramethyl-1,3,2-dioxaborolane (**4i**): Purification by column chromatography on silica gel (petroleum ether/ethyl acetate = 20:1~10:1, v/v) affords the title compound as a yellow solid, Mp = 118-120 °C, 52 mg, 60% yield. <sup>1</sup>H NMR (400 MHz, CDCl<sub>3</sub>) δ 7.28 (d, *J* = 7.4 Hz, 1H), 7.19-7.02 (m, 11H), 6.86 (d, *J* = 7.5 Hz, 1H), 1.78 (s, 3H), 1.34 (s, 3H), 1.28-1.18 (m, 2H), 0.92 (d, *J* = 9.2 Hz, 12H). <sup>13</sup>C{<sup>1</sup>H} NMR (101 MHz, CDCl<sub>3</sub>) δ

154.0, 152.9, 139.7, 138.5, 136.9, 131.4, 130.3, 129.94, 129.90, 129.5, 127.60, 127.57, 127.56, 126.51, 126.47, 125.1, 120.0, 82.7, 52.0, 26.2, 24.8, 24.7, 20.2. IR(neat) 3441, 2968, 1599, 1436, 1352, 1324, 1147, 966, 845, 697. HRMS (ESI-TOF) calcd for C<sub>30</sub>H<sub>34</sub>BO<sub>2</sub> [M+H]<sup>+</sup> : 437.2646, found: 437.2648.

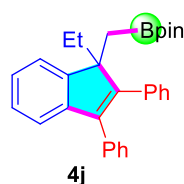

2-((1-ethyl-2,3-diphenyl-1H-inden-1-yl)methyl)-4,4,5,5-tetramethyl-1,3,2-dioxaborolane (**4j**): Purification by column chromatography on silica gel (petroleum ether/ethyl acetate = 20:1~10:1, v/v) affords the title compound as a pale yellow solid, Mp = 63-65 °C, 66 mg, 76% yield. <sup>1</sup>H NMR (400 MHz, CDCl<sub>3</sub>) δ 7.36-7.32 (m, 1H), 7.22-7.10 (m, 13H), 1.95-1.80 (m, 2H), 1.39-1.30 (m, 2H), 0.85 (s, 12H), 0.48 (t, *J* = 7.3 Hz, 3H). <sup>13</sup>C{<sup>1</sup>H} NMR (101 MHz, CDCl<sub>3</sub>) δ 150.7, 150.2, 144.7, 140.3, 137.2, 135.9, 130.2, 129.7, 128.1, 127.9, 126.73, 126.70, 126.4, 125.2, 122.3, 120.1, 82.6, 57.2, 32.1, 24.7, 8.8. IR(neat) 3349, 2974, 1569, 1478, 1401, 1322, 1199, 1105, 942, 803. HRMS (ESI-TOF) calcd for C<sub>30</sub>H<sub>34</sub>BO<sub>2</sub> [M+H]<sup>+</sup> : 437.2646, found: 437.2642.

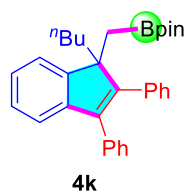

2-((1-butyl-2,3-diphenyl-1H-inden-1-yl)methyl)-4,4,5,5-tetramethyl-1,3,2-dioxaborolane (**4k**): Purification by column chromatography on silica gel (petroleum ether/ethyl acetate = 20:1~10:1, v/v) affords the title compound as a yellow viscous oil, 73 mg, 79% yield. <sup>1</sup>H NMR (400 MHz, CDCl<sub>3</sub>) δ 7.37-7.32 (m, 1H), 7.17 (dddd, *J* = 20.1, 14.0, 7.7, 3.8 Hz, 13H), 1.97-1.70 (m, 2H), 1.40-1.29 (m, 2H), 1.24 (s, 2H), 1.06 (td, *J* = 7.8, 3.5 Hz, 2H), 0.84 (s, 12H), 0.67 (t, *J* = 7.1 Hz, 3H). <sup>13</sup>C{<sup>1</sup>H} NMR (101 MHz, CDCl<sub>3</sub>) δ 151.1, 150.6, 137.2, 135.9, 130.2, 129.7, 128.0, 127.9, 126.72, 126.69, 126.3, 125.1, 122.3, 120.1, 82.6, 56.7, 39.3, 26.2, 24.70, 24.69, 23.1, 14.1. IR(neat) 3430, 2977, 1608, 1544, 1408, 1322, 1274, 1132, 973, 866. HRMS (ESI-TOF) calcd for C<sub>32</sub>H<sub>38</sub>BO<sub>2</sub> [M+H]<sup>+</sup> : 465.2959, found: 465.2960.

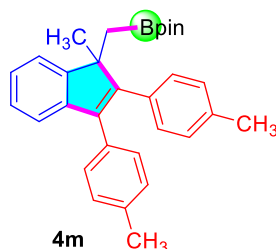

4,4,5,5-tetramethyl-2-((1-methyl-2,3-di-p-tolyl-1H-inden-1-yl)methyl)-1,3,2-dioxaborolane (**4m**): Purification by column chromatography on silica gel (petroleum ether/ethyl acetate = 20:1~10:1, v/v) affords the title compound as a colorless solid, Mp = 122-124 °C, 67 mg, 74% yield. <sup>1</sup>H NMR

(400 MHz, CDCl<sub>3</sub>)  $\delta$  7.46-7.41 (m, 1H), 7.24-7.19 (m, 1H), 7.17-6.88 (m, 10H), 2.23 (d,  $J$  = 4.2 Hz, 6H), 1.38-1.23 (m, 5H), 0.87 (s, 12H). <sup>13</sup>C{<sup>1</sup>H} NMR (101 MHz, CDCl<sub>3</sub>)  $\delta$  152.8, 152.7, 136.2, 134.1, 132.8, 130.2, 129.5, 128.8, 128.7, 126.4, 125.1, 122.3, 120.3, 82.7, 52.7, 26.2, 24.7, 21.42, 21.40. IR(neat) 3429, 2973, 1623, 1587, 1501, 1451, 1329, 1140, 950, 837. HRMS (ESI-TOF) calcd for C<sub>31</sub>H<sub>36</sub>BO<sub>2</sub> [M+H]<sup>+</sup> : 451.2803, found: 451.2809.

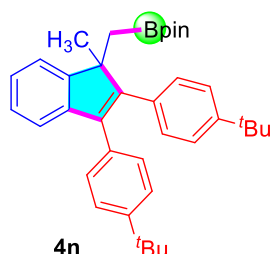

2-((2,3-bis(4-(tert-butyl)phenyl)-1-methyl-1H-inden-1-yl)methyl)-4,4,5,5-tetramethyl-1,3,2-dioxaborolane (**4n**): Purification by column chromatography on silica gel (petroleum ether/ethyl acetate = 20:1~10:1, v/v) affords the title compound as a brown solid, Mp = 86-88 °C, 76 mg, 71% yield. <sup>1</sup>H NMR (400 MHz, CDCl<sub>3</sub>)  $\delta$  7.43 (dd,  $J$  = 5.8, 2.8 Hz, 1H), 7.24 (dd,  $J$  = 5.7, 2.9 Hz, 1H), 7.16 (dq,  $J$  = 13.8, 8.3 Hz, 10H), 1.34 (s, 3H), 1.22 (d,  $J$  = 4.6 Hz, 20H), 0.89 (s, 12H). <sup>13</sup>C{<sup>1</sup>H} NMR (101 MHz, CDCl<sub>3</sub>)  $\delta$  152.9, 152.8, 149.2, 143.8, 134.0, 132.7, 130.0, 129.2, 126.4, 125.0, 124.8, 124.7, 122.3, 120.4, 82.7, 52.8, 34.59, 34.55, 31.50, 31.48, 26.2, 24.79, 24.76. IR(neat) 3562, 2970, 1633, 1539, 1488, 1407, 1359, 1166, 910, 882. HRMS (ESI-TOF) calcd for C<sub>37</sub>H<sub>48</sub>BO<sub>2</sub> [M+H]<sup>+</sup> : 535.3742, found: 535.3742.

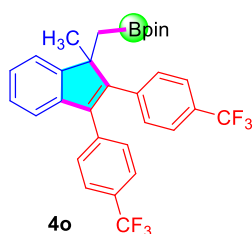

4,4,5,5-tetramethyl-2-((1-methyl-2,3-bis(4-(trifluoromethyl)phenyl)-1H-inden-1-yl)methyl)-1,3,2-dioxaborolane (**4o**): Purification by column chromatography on silica gel (petroleum ether/ethyl acetate = 20:1~5:1, v/v) affords the title compound as a brown solid, Mp = 133-135 °C, 55 mg, 49% yield. <sup>1</sup>H NMR (400 MHz, CDCl<sub>3</sub>)  $\delta$  7.51-7.42 (m, 5H), 7.32 (dd,  $J$  = 10.4, 8.1 Hz, 4H), 7.24-7.17 (m, 3H), 1.44-1.34 (m, 4H), 1.27 (d,  $J$  = 14.8 Hz, 1H), 0.85 (d,  $J$  = 2.8 Hz, 12H). <sup>13</sup>C{<sup>1</sup>H} NMR (101 MHz, CDCl<sub>3</sub>)  $\delta$  152.6, 152.4, 142.5, 140.5, 139.0, 138.0, 130.6, 129.8, 129.4 (d,  $J$  = 10.4 Hz), 129.0 (d,  $J$  = 10.4 Hz), 126.9, 126.1, 125.7 (d,  $J$  = 7.0 Hz), 125.3 (dd,  $J$  = 7.4, 3.6 Hz), 125.1 (dd,  $J$  = 7.5, 3.7 Hz), 123.0 (d,  $J$  = 7.0 Hz), 122.5, 120.3, 82.9, 53.3, 26.3, 24.73, 24.68. <sup>19</sup>F NMR (376 MHz, CDCl<sub>3</sub>)  $\delta$  -62.45 (d,  $J$  = 2.6 Hz). IR(neat) 3547, 2988, 1607, 1533, 1473, 1321, 1109, 899, 766. HRMS (ESI-TOF) calcd for C<sub>31</sub>H<sub>30</sub>F<sub>6</sub>BO<sub>2</sub> [M+H]<sup>+</sup> : 559.2238, found: 559.2231.

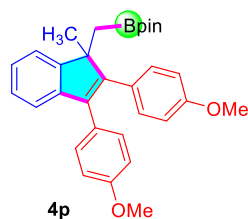

2-((2,3-bis(4-methoxyphenyl)-1-methyl-1H-inden-1-yl)methyl)-4,4,5,5-tetramethyl-1,3,2-dioxaborolane (**4p**): Purification by column chromatography on silica gel (petroleum ether/ethyl acetate = 20:1~5:1, v/v) affords the title compound as a yellow solid, Mp = 119-121 °C, 76 mg, 79% yield.  $^1\text{H}$  NMR (400 MHz,  $\text{CDCl}_3$ )  $\delta$  7.42 (dd,  $J$  = 5.8, 2.8 Hz, 1H), 7.22 (dd,  $J$  = 5.7, 3.0 Hz, 1H), 7.17-7.01 (m, 6H), 6.78-6.69 (m, 4H), 3.71 (d,  $J$  = 3.5 Hz, 6H), 1.34 (s, 4H), 1.25 (d,  $J$  = 7.4 Hz, 1H), 0.87 (d,  $J$  = 3.1 Hz, 12H).  $^{13}\text{C}\{^1\text{H}\}$  NMR (101 MHz,  $\text{CDCl}_3$ )  $\delta$  158.3, 158.2, 152.7, 152.2, 143.7, 137.4, 131.5, 130.7, 129.5, 128.2, 126.4, 125.1, 122.3, 120.2, 113.5, 113.4, 82.7, 55.2, 52.7, 26.3, 24.74, 24.73. IR(neat) 3441, 2962, 1594, 1501, 1351, 1241, 1143, 1032, 839. HRMS (ESI-TOF) calcd for  $\text{C}_{31}\text{H}_{36}\text{BO}_4$   $[\text{M}+\text{H}]^+$  : 483.2701, found: 483.2701.

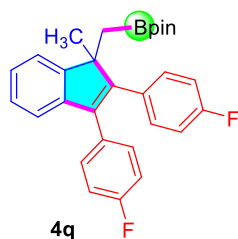

2-((2,3-bis(4-fluorophenyl)-1-methyl-1H-inden-1-yl)methyl)-4,4,5,5-tetramethyl-1,3,2-dioxaborolane (**4q**): Purification by column chromatography on silica gel (petroleum ether/ethyl acetate = 20:1~10:1, v/v) affords the title compound as a red solid, Mp = 139-141 °C, 53 mg, 58% yield.  $^1\text{H}$  NMR (400 MHz,  $\text{CDCl}_3$ )  $\delta$  7.46-7.41 (m, 1H), 7.16 (qd,  $J$  = 5.4, 2.1 Hz, 7H), 6.89 (td,  $J$  = 8.7, 5.7 Hz, 4H), 1.40-1.23 (m, 5H), 0.86 (d,  $J$  = 3.2 Hz, 12H).  $^{13}\text{C}\{^1\text{H}\}$  NMR (101 MHz,  $\text{CDCl}_3$ )  $\delta$  163.2 (d,  $J$  = 22.6 Hz), 160.7 (d,  $J$  = 22.7 Hz), 152.5, 152.2, 143.1, 137.7, 132.7 (d,  $J$  = 3.3 Hz), 132.0 (d,  $J$  = 8.1 Hz), 131.4 (d,  $J$  = 3.3 Hz), 131.1 (d,  $J$  = 7.9 Hz), 126.7, 125.5, 122.4, 120.2, 115.2 (d,  $J$  = 21.3 Hz), 115.1 (d,  $J$  = 21.1 Hz), 82.8, 52.8, 26.2, 24.73, 24.70.  $^{19}\text{F}$  NMR (376 MHz,  $\text{CDCl}_3$ )  $\delta$  -115.27, -115.64. IR(neat) 3440, 2988, 1599, 1508, 1354, 1222, 838, 729. HRMS (ESI-TOF) calcd for  $\text{C}_{29}\text{H}_{30}\text{F}_2\text{O}_2\text{B}$   $[\text{M}+\text{H}]^+$  : 459.2301, found: 459.2302.

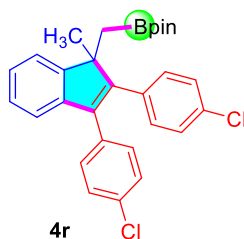

2-((2,3-bis(4-chlorophenyl)-1-methyl-1H-inden-1-yl)methyl)-4,4,5,5-tetramethyl-1,3,2-dioxaborolane (**4r**): Purification by column chromatography on silica gel (petroleum ether/ethyl acetate = 20:1~10:1, v/v) affords the title compound as a brown solid, Mp = 173-175 °C, 55 mg, 56% yield.  $^1\text{H}$  NMR (400 MHz,  $\text{CDCl}_3$ )  $\delta$  7.45-7.40 (m, 1H), 7.21-7.11 (m, 11H), 1.40-1.31 (m, 4H), 1.25 (d,  $J$  =

14.8 Hz, 1H), 0.84 (d,  $J = 3.5$  Hz, 12H).  $^{13}\text{C}\{^1\text{H}\}$  NMR (101 MHz,  $\text{CDCl}_3$ )  $\delta$  152.5, 152.2, 142.8, 137.6, 135.2, 133.8, 133.0, 132.8, 131.7, 130.8, 128.5, 128.4, 126.7, 125.7, 122.4, 120.2, 82.8, 52.9, 26.2, 24.72, 24.68. IR(neat) 3434, 2968, 1566, 1478, 1353, 1327, 1146, 1086, 1015, 830. HRMS (ESI-TOF) calcd for  $\text{C}_{29}\text{H}_{30}\text{BCl}_2\text{O}_2$   $[\text{M}+\text{H}]^+$  : 491.1710, found: 491.1713.

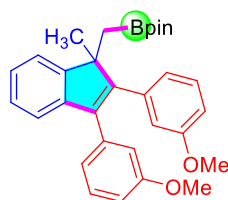

**4s**

2-((2,3-bis(3-methoxyphenyl)-1-methyl-1H-inden-1-yl)methyl)-4,4,5,5-tetramethyl-1,3,2-dioxaborolane (**4s**): Purification by column chromatography on silica gel (petroleum ether/ethyl acetate = 20:1~5:1, v/v) affords the title compound as a brown viscous oil, 67 mg, 70% yield.  $^1\text{H}$  NMR (400 MHz,  $\text{CDCl}_3$ )  $\delta$  7.45-7.40 (m, 1H), 7.28-7.24 (m, 1H), 7.19-7.14 (m, 2H), 7.10 (td,  $J = 7.9, 2.6$  Hz, 2H), 6.87-6.82 (m, 2H), 6.81-6.75 (m, 2H), 6.69 (ddd,  $J = 10.7, 8.1, 2.6$  Hz, 2H), 3.63 (s, 3H), 3.58 (s, 3H), 1.34 (d,  $J = 15.1$  Hz, 5H), 0.86 (d,  $J = 5.7$  Hz, 12H).  $^{13}\text{C}\{^1\text{H}\}$  NMR (101 MHz,  $\text{CDCl}_3$ )  $\delta$  159.2, 159.1, 152.9, 152.6, 143.2, 138.5, 137.9, 137.0, 129.0, 128.8, 126.5, 125.3, 122.8, 122.3, 122.0, 120.4, 115.8, 114.6, 112.9, 112.6, 82.7, 55.2, 55.1, 52.9, 26.3, 24.75, 24.72. IR(neat) 3449, 2997, 1600, 1501, 1477, 1149, 1033, 901, 792. HRMS (ESI-TOF) calcd for  $\text{C}_{31}\text{H}_{36}\text{BO}_4$   $[\text{M}+\text{H}]^+$  : 483.2701, found: 483.2701.

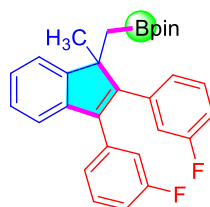

**4t**

2-((2,3-bis(3-fluorophenyl)-1-methyl-1H-inden-1-yl)methyl)-4,4,5,5-tetramethyl-1,3,2-dioxaborolane (**4t**): Purification by column chromatography on silica gel (petroleum ether/ethyl acetate = 20:1~10:1, v/v) affords the title compound as a red solid, Mp = 82-84 °C, 60 mg, 66% yield.  $^1\text{H}$  NMR (400 MHz,  $\text{CDCl}_3$ )  $\delta$  7.45-7.41 (m, 1H), 7.21-7.13 (m, 5H), 6.99-6.81 (m, 6H), 1.39 (d,  $J = 14.7$  Hz, 1H), 1.35 (s, 3H), 1.27 (d,  $J = 14.8$  Hz, 1H), 0.86 (d,  $J = 2.5$  Hz, 12H).  $^{13}\text{C}\{^1\text{H}\}$  NMR (101 MHz,  $\text{CDCl}_3$ )  $\delta$  163.9 (d,  $J = 14.2$  Hz), 161.4 (d,  $J = 14.3$  Hz), 152.4, 152.3 (d,  $J = 2.0$  Hz), 142.7, 139.0 (d,  $J = 8.0$  Hz), 137.7 (d,  $J = 2.1$  Hz), 137.6 (d,  $J = 8.0$  Hz), 129.6 (d,  $J = 17.4$  Hz), 129.5 (d,  $J = 17.5$  Hz), 126.8, 126.1 (d,  $J = 2.9$  Hz), 125.8, 125.2 (d,  $J = 2.9$  Hz), 122.4, 120.3, 117.2 (d,  $J = 21.3$  Hz), 116.3 (d,  $J = 21.6$  Hz), 114.1 (d,  $J = 3.0$  Hz), 113.9 (d,  $J = 3.0$  Hz), 82.82, 52.98, 26.28, 24.71, 24.67.  $^{19}\text{F}$  NMR (376 MHz,  $\text{CDCl}_3$ )  $\delta$  -113.62 (d,  $J = 6.2$  Hz). IR(neat) 3439, 2988, 1504, 1477, 1306, 1256, 1103, 973, 829, 664. HRMS (ESI-TOF) calcd for  $\text{C}_{29}\text{H}_{30}\text{F}_2\text{BO}_2$   $[\text{M}+\text{H}]^+$  : 459.2301, found: 459.2306.

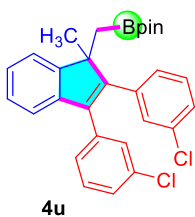

2-((2,3-bis(3-chlorophenyl)-1-methyl-1H-inden-1-yl)methyl)-4,4,5,5-tetramethyl-1,3,2-dioxaborolane (**4u**): Purification by column chromatography on silica gel (petroleum ether/ethyl acetate = 20:1~10:1, v/v) affords the title compound as a brown solid, Mp = 114-116 °C, 70 mg, 71% yield. <sup>1</sup>H NMR (400 MHz, CDCl<sub>3</sub>) δ 7.44-7.39 (m, 1H), 7.23 (d, *J* = 2.0 Hz, 2H), 7.21-7.09 (m, 7H), 7.05 (tt, *J* = 6.4, 1.9 Hz, 2H), 1.42-1.23 (m, 5H), 0.86 (d, *J* = 1.9 Hz, 12H). <sup>13</sup>C{<sup>1</sup>H} NMR (101 MHz, CDCl<sub>3</sub>) δ 152.4, 152.2, 142.7, 138.5, 137.2, 134.0, 133.8, 130.1, 129.6, 129.4, 129.3, 128.7, 127.8, 127.3, 127.2, 126.8, 125.8, 122.4, 120.3, 82.8, 53.0, 26.2, 24.7, 24.6. IR(neat) 3398, 2960, 1539, 1464, 1355, 1231, 1148, 864, 539. HRMS (ESI-TOF) calcd for C<sub>29</sub>H<sub>30</sub>BCl<sub>2</sub>O<sub>2</sub> [M+H]<sup>+</sup>: 491.1710, found: 491.1712.

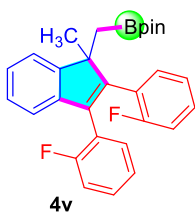

2-((2,3-bis(2-fluorophenyl)-1-methyl-1H-inden-1-yl)methyl)-4,4,5,5-tetramethyl-1,3,2-dioxaborolane (**4v**): Purification by column chromatography on silica gel (petroleum ether/ethyl acetate = 20:1~10:1, v/v) affords the title compound as a colorless solid, Mp = 105-107 °C, 47 mg, 51% yield. <sup>1</sup>H NMR (400 MHz, CDCl<sub>3</sub>) δ 7.52-7.45 (m, 1H), 7.35 (t, *J* = 7.4 Hz, 1H), 7.18-7.09 (m, 5H), 7.05-6.84 (m, 5H), 1.36 (d, *J* = 1.9 Hz, 3H), 1.32-1.11 (m, 2H), 0.92 (d, *J* = 7.3 Hz, 12H). <sup>13</sup>C{<sup>1</sup>H} NMR (101 MHz, CDCl<sub>3</sub>) δ 160.3 (d, *J* = 249.4 Hz), 152.6, 142.8, 135.5, 132.5, 131.6 (d, *J* = 4.0 Hz), 129.2, 129.1, 126.6, 125.5, 124.0, 123.8, 123.7 (d, *J* = 3.6 Hz), 123.6, 122.3, 120.6 (d, *J* = 2.1 Hz), 115.7, 115.5, 82.9, 53.7, 25.6, 24.74, 24.68. <sup>19</sup>F NMR (376 MHz, Chloroform-*d*) δ -111.52. IR(neat) 3441, 2983, 1603, 1481, 1353, 1331, 1149, 759. HRMS (ESI-TOF) calcd for C<sub>29</sub>H<sub>30</sub>F<sub>2</sub>BO<sub>2</sub> [M+H]<sup>+</sup>: 459.2301, found: 459.2303.

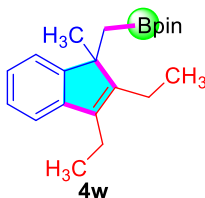

2-((2,3-diethyl-1-methyl-1H-inden-1-yl)methyl)-4,4,5,5-tetramethyl-1,3,2-dioxaborolane (**4w**): Purification by column chromatography on silica gel (petroleum ether/ethyl acetate = 20:1~10:1, v/v) affords the title compound as a brown viscous oil, 44 mg, 67% yield. <sup>1</sup>H NMR (400 MHz, CDCl<sub>3</sub>) δ 7.31 (d, *J* = 7.3 Hz, 1H), 7.10 (d, *J* = 4.2 Hz, 2H), 7.05-7.00 (m, 1H), 2.42 (q, *J* = 7.6 Hz, 2H), 2.28 (ddt, *J* = 21.6, 14.6, 6.8 Hz, 2H), 1.25 (d, *J* = 15.8 Hz, 5H), 1.12-1.06 (m, 6H), 0.90 (d, *J* =



4.4 Hz, 12H).  $^{13}\text{C}\{^1\text{H}\}$  NMR (101 MHz,  $\text{CDCl}_3$ )  $\delta$  153.0, 152.3, 144.2, 136.1, 126.1, 123.9, 121.7, 118.2, 82.7, 51.6, 25.9, 24.74, 24.71, 18.8, 18.4, 14.9, 13.7. IR(neat) 3569, 2925, 1639, 1496, 1366, 1103, 1003, 856, 690. HRMS (ESI-TOF) calcd for  $\text{C}_{21}\text{H}_{32}\text{BO}_2$   $[\text{M}+\text{H}]^+$  : 327.2490, found: 327.2494.

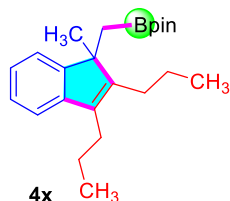

*4,4,5,5-tetramethyl-2-((1-methyl-2,3-dipropyl-1H-inden-1-yl)methyl)-1,3,2-dioxaborolane* (**4x**): Purification by column chromatography on silica gel (petroleum ether/ethyl acetate = 20:1~10:1, v/v) affords the title compound as a brown viscous oil, 42 mg, 60% yield.  $^1\text{H}$  NMR (400 MHz,  $\text{CDCl}_3$ )  $\delta$  7.32 (d,  $J = 7.3$  Hz, 1H), 7.09 (td,  $J = 4.9, 4.0, 2.6$  Hz, 2H), 7.04-6.99 (m, 1H), 2.42-2.31 (m, 2H), 2.27-2.15 (m, 2H), 1.50 (h,  $J = 7.8$  Hz, 5H), 1.25 (d,  $J = 14.8$  Hz, 5H), 0.95 (s, 2H), 0.92 (d,  $J = 5.2$  Hz, 15H).  $^{13}\text{C}\{^1\text{H}\}$  NMR (101 MHz,  $\text{CDCl}_3$ )  $\delta$  153.0, 151.6, 144.4, 134.9, 126.1, 123.8, 121.7, 118.4, 82.7, 51.6, 28.2, 28.1, 26.0, 24.7, 23.5, 22.2, 15.2, 14.8. IR(neat) 3439, 2988, 1664, 1504, 1360, 1229, 1148, 969, 743. HRMS (ESI-TOF) calcd for  $\text{C}_{23}\text{H}_{36}\text{BO}_2$   $[\text{M}+\text{H}]^+$  : 355.2803, found: 355.2801.

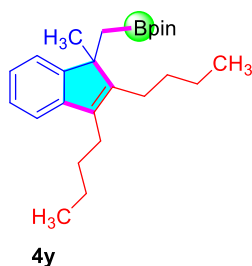

*2-((2,3-dibutyl-1-methyl-1H-inden-1-yl)methyl)-4,4,5,5-tetramethyl-1,3,2-dioxaborolane* (**4y**): Purification by column chromatography on silica gel (petroleum ether/ethyl acetate = 20:1~10:1, v/v) affords the title compound as a brown viscous oil, 40 mg, 52% yield.  $^1\text{H}$  NMR (400 MHz,  $\text{CDCl}_3$ )  $\delta$  7.32 (d,  $J = 7.3$  Hz, 1H), 7.10 (d,  $J = 6.2$  Hz, 2H), 7.04-7.01 (m, 1H), 2.42-2.32 (m, 2H), 2.26-2.15 (m, 2H), 1.48-1.33 (m, 8H), 1.23 (s, 3H), 1.17 (d,  $J = 7.6$  Hz, 2H), 0.92-0.86 (m, 18H).  $^{13}\text{C}\{^1\text{H}\}$  NMR (101 MHz,  $\text{CDCl}_3$ )  $\delta$  152.9, 151.6, 144.4, 134.9, 126.1, 123.8, 121.7, 118.3, 82.7, 51.5, 32.5, 31.2, 25.9, 25.63, 25.61, 24.73, 24.71, 23.8, 23.3, 14.3, 14.2. IR(neat) 3440, 2963, 1586, 1433, 1369, 1222, 1174, 960, 651. HRMS (ESI-TOF) calcd for  $\text{C}_{25}\text{H}_{40}\text{BO}_2$   $[\text{M}+\text{H}]^+$  : 383.3116, found: 383.3118.

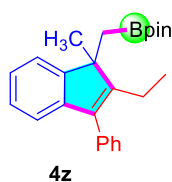

2-((2-ethyl-1-methyl-3-phenyl-1H-inden-1-yl)methyl)-4,4,5,5-tetramethyl-1,3,2-dioxaborolane (**4z**): Purification by column chromatography on silica gel (petroleum ether/ethyl acetate = 20:1~10:1, v/v) affords the title compound as a pale red solid, Mp = 97-99 °C, 47 mg, 63% yield. <sup>1</sup>H NMR (400 MHz, CDCl<sub>3</sub>) δ 7.39 (d, *J* = 7.3 Hz, 1H), 7.35-7.29 (m, 2H), 7.29-7.20 (m, 4H), 7.18-7.08 (m, 2H), 2.36-2.18 (m, 2H), 1.27 (s, 3H), 1.20 (d, *J* = 15.1 Hz, 2H), 1.03 (t, *J* = 7.5 Hz, 3H), 0.88 (d, *J* = 5.5 Hz, 12H). <sup>13</sup>C{<sup>1</sup>H} NMR (101 MHz, CDCl<sub>3</sub>) δ 153.0, 151.4, 143.6, 138.5, 137.4, 130.1, 128.1, 126.9, 126.4, 124.7, 122.2, 119.2, 82.7, 52.2, 25.9, 24.7, 19.3, 13.9. IR(neat) 3401, 2898, 1647, 1556, 1433, 1399, 1311, 1186, 951, 887, 563. HRMS (ESI-TOF) calcd for C<sub>25</sub>H<sub>32</sub>BO<sub>2</sub> [M+H]<sup>+</sup> : 375.2490, found: 375.2493.

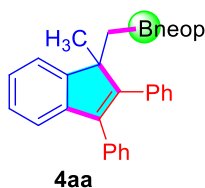

5,5-dimethyl-2-((1-methyl-2,3-diphenyl-1H-inden-1-yl)methyl)-1,3,2-dioxaborinane (**4aa**): Purification by column chromatography on silica gel (petroleum ether/ethyl acetate = 20:1~10:1, v/v) affords the title compound as a brown solid, Mp = 97-99 °C, 52 mg, 64% yield. <sup>1</sup>H NMR (400 MHz, CDCl<sub>3</sub>) δ 7.43-7.38 (m, 1H), 7.25-7.08 (m, 13H), 3.26 (s, 4H), 1.36 (s, 3H), 1.26 (s, 2H), 0.55 (s, 6H). <sup>13</sup>C{<sup>1</sup>H} NMR (101 MHz, CDCl<sub>3</sub>) δ 153.6, 153.3, 143.3, 137.7, 137.2, 135.8, 130.4, 129.6, 128.1, 127.8, 126.7, 126.4, 125.2, 122.2, 120.4, 71.8, 53.2, 31.6, 31.4, 30.3, 26.1, 21.7. IR(neat) 3462, 2977, 1603, 1466, 1368, 1103, 872, 697, 533. HRMS (ESI-TOF) calcd for C<sub>28</sub>H<sub>30</sub>BO<sub>2</sub> [M+H]<sup>+</sup> : 409.2333, found: 409.2335.

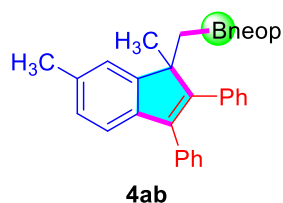

2-((1,6-dimethyl-2,3-diphenyl-1H-inden-1-yl)methyl)-5,5-dimethyl-1,3,2-dioxaborinane (**4ab**): Purification by column chromatography on silica gel (petroleum ether/ethyl acetate = 20:1~10:1, v/v) affords the title compound as a pale red solid, Mp = 99-101 °C, 59 mg, 70% yield. <sup>1</sup>H NMR (400 MHz, CDCl<sub>3</sub>) δ 7.22 (d, *J* = 1.7 Hz, 1H), 7.19-7.07 (m, 11H), 6.94 (dd, *J* = 7.7, 1.5 Hz, 1H), 3.27 (s, 4H), 2.34 (s, 3H), 1.36 (s, 3H), 1.22 (d, *J* = 8.5 Hz, 2H), 0.57 (s, 6H). <sup>13</sup>C{<sup>1</sup>H} NMR (101 MHz, CDCl<sub>3</sub>) δ 153.7, 152.7, 140.7, 137.5, 137.4, 136.0, 134.8, 130.5, 129.6, 128.0, 127.8, 127.0, 126.61, 126.59, 123.1, 120.1, 71.8, 53.0, 31.4, 26.1, 21.8, 21.7. IR(neat) 3470, 2932, 1600, 1798, 1360, 1113, 982, 814, 697. HRMS (ESI-TOF) calcd for C<sub>29</sub>H<sub>32</sub>BO<sub>2</sub> [M+H]<sup>+</sup> : 423.2490, found: 423.2493.

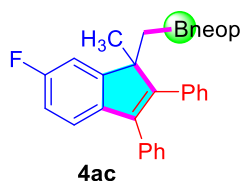

(*S*)-2-((6-fluoro-1-methyl-2,3-diphenyl-1*H*-inden-1-yl)methyl)-5,5-dimethyl-1,3,2-dioxaborinane (**4ac**): Purification by column chromatography on silica gel (petroleum ether/ethyl acetate = 20:1~10:1, v/v) affords the title compound as a brown solid, Mp = 100-102 °C, 66 mg, 77% yield. <sup>1</sup>H NMR (400 MHz, CDCl<sub>3</sub>) δ 7.20-7.09 (m, 12H), 6.82 (ddd, *J* = 10.7, 8.5, 2.4 Hz, 1H), 3.29 (s, 4H), 1.35 (s, 3H), 1.22 (d, *J* = 4.9 Hz, 2H), 0.60 (s, 6H). <sup>13</sup>C{<sup>1</sup>H} NMR (101 MHz, CDCl<sub>3</sub>) δ 161.9 (d, *J* = 243.9 Hz), 155.7 (d, *J* = 7.5 Hz), 153.3 (d, *J* = 4.1 Hz), 139.1 (d, *J* = 2.2 Hz), 137.0, 135.6, 130.4, 129.5, 128.1, 127.9, 126.8 (d, *J* = 4.6 Hz), 121.0 (d, *J* = 8.5 Hz), 112.9 (d, *J* = 22.8 Hz), 110.1 (d, *J* = 23.1 Hz), 71.9, 53.2, 53.2, 31.4, 26.0, 21.7. <sup>19</sup>F NMR (376 MHz, CDCl<sub>3</sub>) δ -117.83. IR(neat) 3364, 2899, 1703, 1655, 1432, 1308, 1211, 1106, 977, 838. HRMS (ESI-TOF) calcd for C<sub>28</sub>H<sub>29</sub>FBO<sub>2</sub> [M+H]<sup>+</sup> : 427.2239, found: 427.2242.

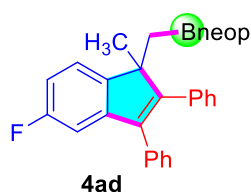

2-((5-fluoro-1-methyl-2,3-diphenyl-1*H*-inden-1-yl)methyl)-5,5-dimethyl-1,3,2-dioxaborinane (**4ad**): Purification by column chromatography on silica gel (petroleum ether/ethyl acetate = 20:1~10:1, v/v) affords the title compound as a brown solid, Mp = 123-125 °C, 52 mg, 61% yield. <sup>1</sup>H NMR (400 MHz, CDCl<sub>3</sub>) δ 7.39 (dd, *J* = 8.1, 5.2 Hz, 1H), 7.32-7.15 (m, 10H), 7.00-6.88 (m, 2H), 3.35 (s, 4H), 1.41 (s, 3H), 1.32 (d, *J* = 9.1 Hz, 2H), 0.66 (d, *J* = 0.9 Hz, 6H). <sup>13</sup>C{<sup>1</sup>H} NMR (101 MHz, CDCl<sub>3</sub>) δ 162.4 (d, *J* = 242.0 Hz), 155.6, 148.7 (d, *J* = 2.3 Hz), 145.3 (d, *J* = 8.7 Hz), 137.2 (d, *J* = 3.0 Hz), 136.9, 135.2, 130.2, 129.4, 128.2, 127.9, 127.0 (d, *J* = 4.7 Hz), 123.0 (d, *J* = 9.0 Hz), 111.6 (d, *J* = 22.8 Hz), 107.5 (d, *J* = 23.3 Hz), 71.9, 52.8, 31.4, 26.3, 21.7. <sup>19</sup>F NMR (376 MHz, CDCl<sub>3</sub>) δ -117.34. IR(neat) 3430, 2966, 1674, 1467, 1382, 1030, 841, 679, 593. HRMS (ESI-TOF) calcd for C<sub>28</sub>H<sub>29</sub>FBO<sub>2</sub> [M+H]<sup>+</sup> : 427.2239, found: 427.2239.

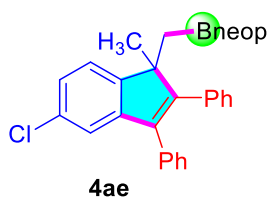

2-((5-chloro-1-methyl-2,3-diphenyl-1*H*-inden-1-yl)methyl)-5,5-dimethyl-1,3,2-dioxaborinane (**4ae**): Purification by column chromatography on silica gel (petroleum ether/ethyl acetate = 20:1~10:1, v/v) affords the title compound as a brown solid, Mp = 101-103 °C, 648 mg, 54% yield. <sup>1</sup>H NMR (400 MHz, CDCl<sub>3</sub>) δ 7.38 (d, *J* = 7.9 Hz, 1H), 7.29-7.16 (m, 12H), 3.36 (s, 4H), 1.41 (s, 3H), 1.31 (d, *J* = 7.6 Hz, 2H), 0.66 (d, *J* = 0.9 Hz, 6H). <sup>13</sup>C{<sup>1</sup>H} NMR (101 MHz, CDCl<sub>3</sub>) δ 155.2, 151.7, 145.3, 137.1, 136.7, 135.1, 132.2, 130.2, 129.5, 128.3, 127.9, 127.01, 126.96, 125.0, 123.2, 120.5, 71.9, 53.0, 31.4, 26.1, 21.6. IR(neat) 3411, 2964, 1605, 1477, 1392, 1240, 1169, 1008, 944, 802. HRMS (ESI-TOF) calcd for C<sub>28</sub>H<sub>29</sub>ClBO<sub>2</sub> [M+H]<sup>+</sup> : 443.1944, found: 443.1947.

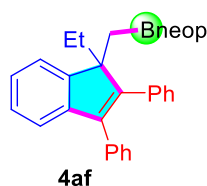

2-((1-ethyl-2,3-diphenyl-1H-inden-1-yl)methyl)-5,5-dimethyl-1,3,2-dioxaborinane (**4af**): Purification by column chromatography on silica gel (petroleum ether/ethyl acetate = 20:1~10:1, v/v) affords the title compound as a brown viscous oil, 56 mg, 66% yield.  $^1\text{H}$  NMR (400 MHz,  $\text{CDCl}_3$ )  $\delta$  7.39 (dd,  $J = 6.5, 1.7$  Hz, 1H), 7.28-7.16 (m, 13H), 3.31 (s, 4H), 2.06-1.87 (m, 2H), 1.43-1.30 (m, 2H), 0.60 (s, 6H), 0.52 (t,  $J = 7.3$  Hz, 3H).  $^{13}\text{C}\{^1\text{H}\}$  NMR (101 MHz,  $\text{CDCl}_3$ )  $\delta$  151.4, 150.6, 144.6, 140.0, 137.4, 136.1, 130.2, 129.7, 128.1, 127.9, 126.7, 126.6, 126.2, 125.1, 122.1, 120.1, 71.8, 57.6, 32.1, 31.3, 21.7, 8.7. IR(neat) 3365, 2903, 1677, 1546, 1339, 1286, 1135, 1091, 879, 667. HRMS (ESI-TOF) calcd for  $\text{C}_{29}\text{H}_{32}\text{BO}_2$   $[\text{M}+\text{H}]^+$  : 423.2490, found: 423.2497.

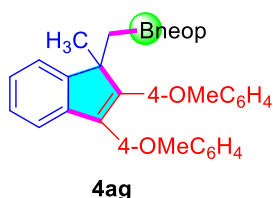

2-((2,3-bis(4-methoxyphenyl)-1-methyl-1H-inden-1-yl)methyl)-5,5-dimethyl-1,3,2-dioxaborinane (**4ag**): Purification by column chromatography on silica gel (petroleum ether/ethyl acetate = 20:1~10:1, v/v) affords the title compound as a brown viscous oil, 67 mg, 72% yield.  $^1\text{H}$  NMR (400 MHz,  $\text{CDCl}_3$ )  $\delta$  7.46 (dd,  $J = 6.7, 1.8$  Hz, 1H), 7.29 (dd,  $J = 6.9, 1.9$  Hz, 1H), 7.24-7.14 (m, 6H), 6.80 (d,  $J = 8.5$  Hz, 4H), 3.77 (s, 6H), 3.33 (s, 4H), 1.41 (s, 3H), 1.31 (d,  $J = 3.8$  Hz, 2H), 0.62 (s, 6H).  $^{13}\text{C}\{^1\text{H}\}$  NMR (101 MHz,  $\text{CDCl}_3$ )  $\delta$  158.3, 158.2, 153.4, 152.6, 143.6, 137.1, 131.5, 130.7, 129.7, 128.3, 126.3, 125.0, 122.1, 120.2, 113.6, 113.3, 71.8, 55.21, 55.18, 53.0, 31.3, 26.2, 21.7. IR(neat) 3401, 2973, 1505, 1496, 1387, 1266, 1164, 1100, 927, 843, 566. HRMS (ESI-TOF) calcd for  $\text{C}_{30}\text{H}_{34}\text{BO}_4$   $[\text{M}+\text{H}]^+$  : 469.2545, found: 469.2549.

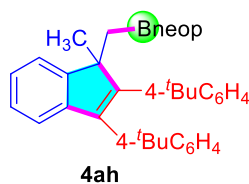

2-((2,3-bis(4-tert-butylphenyl)-1-methyl-1H-inden-1-yl)methyl)-5,5-dimethyl-1,3,2-dioxaborinane (**4ah**): Purification by column chromatography on silica gel (petroleum ether/ethyl acetate = 20:1~10:1, v/v) affords the title compound as a brown viscous oil, 72 mg, 69% yield.  $^1\text{H}$  NMR (400 MHz,  $\text{CDCl}_3$ )  $\delta$  7.47-7.44 (m, 1H), 7.33-7.30 (m, 1H), 7.27-7.24 (m, 4H), 7.19 (dd,  $J = 8.4, 2.0$  Hz, 6H), 3.32 (s, 4H), 1.43 (s, 3H), 1.34-1.32 (m, 2H), 1.29 (d,  $J = 1.4$  Hz, 18H), 0.65 (s, 6H).  $^{13}\text{C}\{^1\text{H}\}$  NMR (101 MHz,  $\text{CDCl}_3$ )  $\delta$  153.6, 153.3, 149.2, 149.1, 143.7, 134.2, 130.0, 129.3, 126.2, 124.9, 124.9, 124.6, 122.1, 120.5, 71.8, 53.2, 34.59, 34.55, 31.51, 31.49, 31.4, 26.1, 21.8. IR(neat) 3406, 2962, 1635, 1486, 1381, 1199, 1154, 857, 591. HRMS (ESI-TOF) calcd for  $\text{C}_{36}\text{H}_{46}\text{BO}_2$   $[\text{M}+\text{H}]^+$  : 521.3585, found: 521.3587.

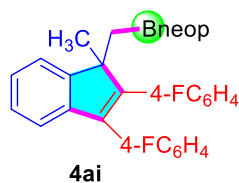

2-((2,3-bis(4-fluorophenyl)-1-methyl-1H-inden-1-yl)methyl)-5,5-dimethyl-1,3,2-dioxaborinane (**4ai**): Purification by column chromatography on silica gel (petroleum ether/ethyl acetate = 20:1~10:1, v/v) affords the title compound as a red solid, Mp = 125-127 °C, 51 mg, 57% yield. <sup>1</sup>H NMR (400 MHz, CDCl<sub>3</sub>) δ 7.51-7.45 (m, 1H), 7.26-7.14 (m, 7H), 6.95 (t, *J* = 8.6 Hz, 4H), 3.33 (s, 4H), 1.40 (s, 3H), 1.31 (s, 2H), 0.61 (s, 6H). <sup>13</sup>C{<sup>1</sup>H} NMR (101 MHz, CDCl<sub>3</sub>) δ 163.0 (d, *J* = 18.6 Hz), 160.6 (d, *J* = 18.8 Hz), 153.1, 152.7, 143.0, 137.3, 132.9 (d, *J* = 3.6 Hz), 132.0 (d, *J* = 7.9 Hz), 131.5 (d, *J* = 3.3 Hz), 131.1 (d, *J* = 7.9 Hz), 126.5, 125.5, 122.3, 120.2, 115.2 (d, *J* = 24.7 Hz), 114.9 (d, *J* = 24.6 Hz), 71.9, 53.2, 31.4, 26.2, 21.6. <sup>19</sup>F NMR (376 MHz, CDCl<sub>3</sub>) δ -115.31, -115.70. IR(neat) 3449, 2966, 1632, 1347, 1244, 1036, 849, 792. HRMS (ESI-TOF) calcd for C<sub>28</sub>H<sub>28</sub>BF<sub>2</sub>O<sub>2</sub> [M+H]<sup>+</sup>: 445.2145, found: 445.2142.

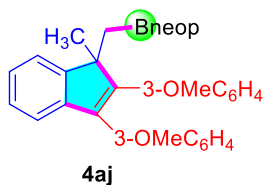

2-((2,3-bis(3-methoxyphenyl)-1-methyl-1H-inden-1-yl)methyl)-5,5-dimethyl-1,3,2-dioxaborinane (**4aj**): Purification by column chromatography on silica gel (petroleum ether/ethyl acetate = 20:1~10:1, v/v) affords the title compound as a red viscous oil, 63 mg, 67% yield. <sup>1</sup>H NMR (400 MHz, CDCl<sub>3</sub>) δ 7.50-7.44 (m, 1H), 7.33 (dd, *J* = 7.0, 1.7 Hz, 1H), 7.26-7.15 (m, 4H), 6.93-6.80 (m, 4H), 6.75 (dddd, *J* = 8.0, 3.9, 2.6, 1.0 Hz, 2H), 3.70 (s, 3H), 3.66 (s, 3H), 3.34 (s, 4H), 1.44 (s, 3H), 1.35 (d, *J* = 10.0 Hz, 2H), 0.62 (s, 6H). <sup>13</sup>C{<sup>1</sup>H} NMR (101 MHz, CDCl<sub>3</sub>) δ 159.3, 159.1, 153.4, 153.3, 143.1, 138.7, 137.8, 137.2, 129.0, 128.8, 126.4, 125.2, 122.9, 122.2, 122.0, 120.5, 116.1, 114.8, 112.8, 112.3, 71.8, 55.2, 53.2, 31.4, 26.3, 21.7. IR(neat) 3439, 2993, 1677, 1458, 1329, 1102, 997, 870, 559. HRMS (ESI-TOF) calcd for C<sub>30</sub>H<sub>34</sub>BO<sub>4</sub> [M+H]<sup>+</sup>: 469.2545, found: 469.2548.

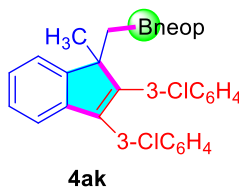

2-((2,3-bis(3-chlorophenyl)-1-methyl-1H-inden-1-yl)methyl)-5,5-dimethyl-1,3,2-dioxaborinane (**4ak**): Purification by column chromatography on silica gel (petroleum ether/ethyl acetate = 20:1~10:1, v/v) affords the title compound as a red viscous oil, 50 mg, 53% yield. <sup>1</sup>H NMR (400 MHz, CDCl<sub>3</sub>) δ 7.42-7.38 (m, 1H), 7.24-7.10 (m, 9H), 7.02 (ddt, *J* = 8.8, 4.4, 1.6 Hz, 2H), 3.27 (d, *J* = 1.7 Hz, 4H), 1.34 (s, 3H), 1.25 (d, *J* = 6.5 Hz, 2H), 0.54 (s, 6H). <sup>13</sup>C{<sup>1</sup>H} NMR (101 MHz, CDCl<sub>3</sub>) δ 153.0, 152.8, 142.5, 138.7, 137.4, 137.3, 134.0, 133.8, 130.0, 129.6, 129.4, 129.3, 128.8, 127.9, 127.23, 127.21, 126.6, 125.8, 122.3, 120.3, 71.9, 53.4, 31.4, 26.2, 21.6. IR(neat) 3448, 2956, 1577, 1501, 1237,

1156, 992, 827, 729. HRMS (ESI-TOF) calcd for  $C_{28}H_{28}BCl_2O_2$   $[M+H]^+$  : 477.1554, found: 477.1554.

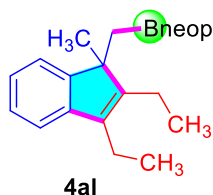

*2-((2,3-diethyl-1-methyl-1H-inden-1-yl)methyl)-5,5-dimethyl-1,3,2-dioxaborinane* (**4al**): Purification by column chromatography on silica gel (petroleum ether/ethyl acetate = 20:1~10:1, v/v) affords the title compound as a red viscous oil, 34 mg, 55% yield.  $^1H$  NMR (400 MHz,  $CDCl_3$ )  $\delta$  7.34 (d,  $J = 7.2$  Hz, 1H), 7.22-7.14 (m, 2H), 7.14-7.07 (m, 1H), 3.33 (s, 4H), 2.53-2.26 (m, 4H), 1.28 (d,  $J = 10.0$  Hz, 5H), 1.15 (td,  $J = 7.6, 5.7$  Hz, 6H), 0.69 (s, 6H).  $^{13}C\{^1H\}$  NMR (101 MHz,  $CDCl_3$ )  $\delta$  153.3, 152.8, 144.1, 135.7, 126.0, 123.8, 121.6, 118.2, 71.7, 51.9, 31.4, 25.9, 21.8, 18.7, 18.5, 14.9, 13.8. IR(neat) 3448, 2962, 1499, 1423, 1356, 1232, 1164, 1147, 984, 816. HRMS (ESI-TOF) calcd for  $C_{20}H_{30}BO_2$   $[M+H]^+$  : 313.2333, found: 313.2337.

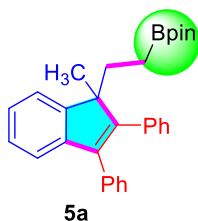

*4,4,5,5-tetramethyl-2-(2-(1-methyl-2,3-diphenyl-1H-inden-1-yl)ethyl)-1,3,2-dioxaborolane* (**5a**): Purification by column chromatography on silica gel (petroleum ether/ethyl acetate = 20:1~10:1, v/v) affords the title compound as a pale yellow oil, 68 mg, 78% yield.  $^1H$  NMR (400 MHz,  $CDCl_3$ )  $\delta$  7.39-7.10 (m, 14H), 2.08-1.90 (m, 2H), 1.41 (s, 3H), 1.18 (d,  $J = 7.4$  Hz, 12H), 0.59 (ddd,  $J = 16.7, 12.2, 4.6$  Hz, 1H), 0.24 (ddd,  $J = 16.9, 12.2, 5.4$  Hz, 1H).  $^{13}C\{^1H\}$  NMR (101 MHz,  $CDCl_3$ )  $\delta$  151.3, 150.5, 140.3, 136.9, 135.4, 129.8, 129.7, 128.14, 128.09, 126.93, 126.86, 126.5, 125.5, 121.9, 120.5, 83.0, 56.4, 31.8, 25.0, 24.8, 23.9. IR(neat) 3477, 2976, 2309, 1574, 1366, 1279, 1063, 856, 563. HRMS (ESI-TOF) calcd for  $C_{30}H_{34}BO_2$   $[M+H]^+$  : 437.2646, found: 437.2647.

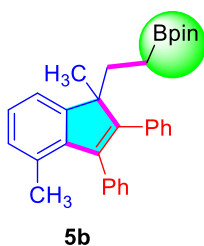

*(S)-2-(2-(1,4-dimethyl-2,3-diphenyl-1H-inden-1-yl)ethyl)-4,4,5,5-tetramethyl-1,3,2-dioxaborolane* (**5b**): Purification by column chromatography on silica gel (petroleum ether/ethyl acetate = 20:1~10:1, v/v) affords the title compound as a brown solid, Mp = 132-134  $^{\circ}C$ , 56 mg, 62% yield.  $^1H$  NMR (400 MHz,  $CDCl_3$ )  $\delta$  7.15-7.03 (m, 10H), 7.01-6.95 (m, 2H), 6.87 (d,  $J = 7.4$  Hz, 1H),

1.95-1.77 (m, 5H), 1.30 (s, 3H), 1.12 (d,  $J = 7.5$  Hz, 12H), 0.56 (ddd,  $J = 16.6, 12.5, 4.3$  Hz, 1H), 0.20 (ddd,  $J = 16.3, 12.5, 5.2$  Hz, 1H).  $^{13}\text{C}\{^1\text{H}\}$  NMR (101 MHz,  $\text{CDCl}_3$ )  $\delta$  151.5, 151.4, 142.1, 138.3, 136.7, 131.7, 130.4, 129.9, 129.7, 129.6, 127.74, 127.70, 126.63, 126.59, 125.4, 119.6, 83.0, 55.7, 31.7, 25.0, 24.9, 24.0, 20.3. IR(neat) 3436, 3980, 1603, 1321, 1143, 846, 758, 699. HRMS (ESI-TOF) calcd for  $\text{C}_{31}\text{H}_{36}\text{BO}_2$   $[\text{M}+\text{H}]^+$  : 451.2803, found: 451.2806.

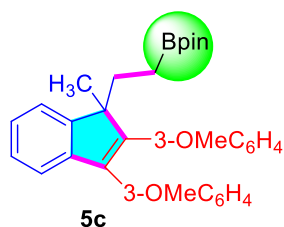

*2-(2-(2,3-bis(3-methoxyphenyl)-1-methyl-1H-inden-1-yl)ethyl)-4,4,5,5-tetramethyl-1,3,2-dioxaborolane (5c)*: Purification by column chromatography on silica gel (petroleum ether/ethyl acetate = 20:1~10:1, v/v) affords the title compound as a pale yellow oil, 79 mg, 80% yield.  $^1\text{H}$  NMR (400 MHz,  $\text{CDCl}_3$ )  $\delta$  7.30-7.25 (m, 2H), 7.19-7.15 (m, 2H), 7.13-7.06 (m, 2H), 6.81 (dd,  $J = 7.6, 1.4$  Hz, 1H), 6.76-6.73 (m, 1H), 6.68 (td,  $J = 7.3, 6.3, 2.0$  Hz, 3H), 6.63-6.59 (m, 1H), 3.60 (d,  $J = 5.4$  Hz, 6H), 1.93 (ddd,  $J = 10.7, 5.6, 3.7$  Hz, 2H), 1.33 (s, 3H), 1.10 (d,  $J = 6.7$  Hz, 12H), 0.51 (ddd,  $J = 16.5, 10.9, 5.7$  Hz, 1H), 0.16 (ddd,  $J = 17.0, 11.1, 6.7$  Hz, 1H).  $^{13}\text{C}\{^1\text{H}\}$  NMR (101 MHz,  $\text{CDCl}_3$ )  $\delta$  159.4, 159.3, 151.3, 150.3, 129.2, 129.1, 126.6, 125.6, 122.2, 122.2, 121.9, 120.6, 114.9, 114.8, 113.1, 112.8, 83.0, 56.4, 55.3, 55.2, 31.9, 25.0, 24.9, 24.0. IR(neat) 3463, 2869, 2300, 1603, 1477, 1289, 1143, 980, 693. HRMS (ESI-TOF) calcd for  $\text{C}_{32}\text{H}_{38}\text{BO}_4$   $[\text{M}+\text{H}]^+$  : 497.2858, found: 497.2864.

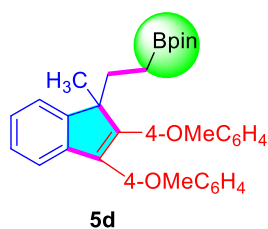

*2-(2-(2,3-bis(4-methoxyphenyl)-1-methyl-1H-inden-1-yl)ethyl)-4,4,5,5-tetramethyl-1,3,2-dioxaborolane (5d)*: Purification by column chromatography on silica gel (petroleum ether/ethyl acetate = 20:1~10:1, v/v) affords the title compound as a red solid, Mp = 133-135 °C, 81 mg, 82% yield.  $^1\text{H}$  NMR (400 MHz,  $\text{CDCl}_3$ )  $\delta$  7.37 (ddd,  $J = 16.3, 5.9, 3.3$  Hz, 2H), 7.25 (ddd,  $J = 13.7, 8.0, 3.1$  Hz, 4H), 7.11 (d,  $J = 8.6$  Hz, 2H), 6.88-6.81 (m, 4H), 3.82 (s, 6H), 2.10-1.94 (m, 2H), 1.43 (s, 3H), 1.22 (d,  $J = 7.1$  Hz, 12H), 0.60 (ddd,  $J = 16.7, 12.3, 4.6$  Hz, 1H), 0.25 (ddd,  $J = 16.9, 12.2, 5.3$  Hz, 1H).  $^{13}\text{C}\{^1\text{H}\}$  NMR (101 MHz,  $\text{CDCl}_3$ )  $\delta$  158.37, 158.35, 151.3, 149.4, 144.5, 130.9, 130.8, 129.3, 127.9, 126.4, 125.3, 121.7, 120.3, 113.60, 113.56, 83.0, 56.1, 55.21, 55.19, 31.9, 25.0, 24.8, 24.0. IR(neat) 3437, 2961, 1603, 1479, 1352, 1260, 1106, 901, 829, 566. HRMS (ESI-TOF) calcd for  $\text{C}_{32}\text{H}_{38}\text{BO}_4$   $[\text{M}+\text{H}]^+$  : 497.2858, found: 497.2864.

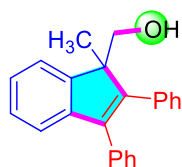

6

(1-methyl-2,3-diphenyl-1H-inden-1-yl)methanol (**6**): Purification by column chromatography on silica gel (petroleum ether/ethyl acetate = 5:1~2:1, v/v) affords the title compound as a colorless solid, Mp = 117-119 °C, 59 mg, 94% yield. <sup>1</sup>H NMR (400 MHz, CDCl<sub>3</sub>) δ 7.40-7.37 (m, 1H), 7.33-7.29 (m, 1H), 7.24-7.14 (m, 10H), 7.11 (td, *J* = 4.4, 2.3 Hz, 2H), 3.87 (d, *J* = 10.9 Hz, 1H), 3.71 (d, *J* = 10.9 Hz, 1H), 1.29 (s, 3H). <sup>13</sup>C{<sup>1</sup>H} NMR (101 MHz, CDCl<sub>3</sub>) δ 149.5, 148.9, 144.5, 140.6, 136.3, 134.8, 129.8, 129.6, 128.4, 128.2, 127.5, 127.3, 127.2, 125.8, 122.1, 121.1, 67.5, 57.6, 19.3. IR(neat) 3564, 2929, 1632, 1440, 1036, 761, 573. HRMS (ESI-TOF) calcd for C<sub>23</sub>H<sub>21</sub>O [M+H]<sup>+</sup> : 313.1587, found: 313.1589.

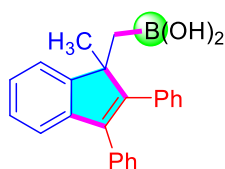

7

((1-methyl-2,3-diphenyl-1H-inden-1-yl)methyl)boronic acid (**7**): Purification by column chromatography on silica gel (petroleum ether/ethyl acetate = 10:1~1:1, v/v) affords the title compound as a colorless solid, Mp = 120-122 °C, 54 mg, 80% yield. <sup>1</sup>H NMR (400 MHz, CDCl<sub>3</sub>) δ 7.43-7.38 (m, 1H), 7.36-7.32 (m, 1H), 7.28-7.24 (m, 2H), 7.22-7.14 (m, 8H), 7.10 (dd, *J* = 7.7, 1.9 Hz, 2H), 3.91 (d, *J* = 2.9 Hz, 2H), 1.56 (d, *J* = 16.1 Hz, 1H), 1.48 (d, *J* = 16.1 Hz, 1H), 1.37 (s, 3H). <sup>13</sup>C{<sup>1</sup>H} NMR (101 MHz, CDCl<sub>3</sub>) δ 153.1, 152.3, 142.8, 138.9, 136.1, 134.6, 129.8, 129.5, 128.34, 128.30, 127.5, 127.33, 127.31, 126.5, 122.0, 121.6, 52.9, 27.3. IR(neat) 3540, 3389, 1595, 1400, 1326, 1072, 763, 701, 572. HRMS (ESI-TOF) calcd for C<sub>23</sub>H<sub>22</sub>BO<sub>2</sub> [M+H]<sup>+</sup> : 341.1707, found: 341.1709.

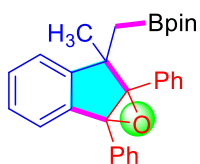

8

4,4,5,5-tetramethyl-2-((6-methyl-1a,6a-diphenyl-1a,6a-dihydro-6H-indeno[1,2-b]oxiren-6-yl)methyl)-1,3,2-dioxaborolane (**8**): Purification by column chromatography on silica gel (petroleum ether/ethyl acetate = 20:1~10:1, v/v) affords the title compound as a colorless solid, Mp = 134-136 °C, 68 mg, 78% yield. <sup>1</sup>H NMR (400 MHz, CDCl<sub>3</sub>) δ 7.42 (dd, *J* = 7.4, 1.4 Hz, 1H), 7.33 (td, *J* = 7.5, 1.4 Hz, 1H), 7.29-7.20 (m, 9H), 7.16 (dd, *J* = 8.0, 1.8 Hz, 2H), 7.10 (dd, *J* = 7.6, 1.4 Hz, 1H), 1.52 (d, *J* = 15.8 Hz, 1H), 1.32 (d, *J* = 15.8 Hz, 1H), 1.20 (s, 3H), 1.15 (s, 6H), 1.00 (s, 6H). <sup>13</sup>C{<sup>1</sup>H} NMR (101 MHz, CDCl<sub>3</sub>) δ 147.0, 144.1, 143.1, 129.7, 129.0, 128.4, 128.2, 128.0, 127.6.



127.2, 127.1, 126.8, 123.4, 83.4, 67.6, 51.5, 29.2, 24.9, 24.5. IR(neat) 3478, 2975, 1755, 1444, 1361, 1326, 1133, 884, 795, 703. HRMS (ESI-TOF) calcd for  $C_{29}H_{32}BO_3$   $[M+H]^+$  : 439.2439, found: 439.2440.

## 8. Crystallographic data of 4o and 4i'

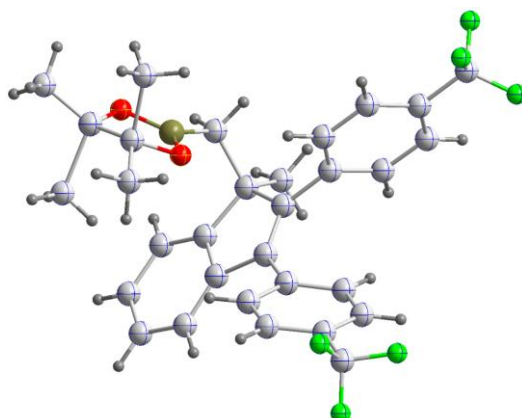

Structure of 4o CCDC: 2353045

### Datablock:

|                                |                                                         |                                  |
|--------------------------------|---------------------------------------------------------|----------------------------------|
| Bond precision:                | C-C = 0.0098 Å                                          | Wavelength = 0.71073             |
| Cell:                          | a = 8.649(7)    b=13.234(7)    c=13.312(8)              |                                  |
|                                | alpha=107.837(10)    beta=95.839(10)    gamma=96.840(7) |                                  |
| Temperature:                   | 296 K                                                   |                                  |
|                                | Calculated                                              | Reported                         |
| Volume                         | 1424.7(16)                                              | 1424.7(16)                       |
| Space group                    | p -1                                                    | p -1                             |
| Hall group                     | -p 1                                                    | -p 1                             |
| Moiety formula                 | C30 H26 B F6 O2 CH3                                     |                                  |
| Sum formula                    | C31 H29 B F6 O2                                         | C31 H29 B F6 O2                  |
| Mr                             | 558.35                                                  | 558.38                           |
| Dx, g cm <sup>-3</sup>         | 1.302                                                   | 1.302                            |
| Z                              | 2                                                       | 2                                |
| Mu (mm <sup>-1</sup> )         | 0.106                                                   | 0.106                            |
| F000                           | 580.0                                                   | 580.0                            |
| F000'                          | 580.39                                                  |                                  |
| h,k,lmax                       | 10,15,15                                                | 10,15,15                         |
| Nref                           | 5022                                                    | 4947                             |
| Tmin,Tmax                      |                                                         |                                  |
| Tmin'                          |                                                         |                                  |
| Correction method = Not given  |                                                         |                                  |
| Data completeness = 0.985      |                                                         | Theta (max) = 24.998             |
| R (reflections) = 0.1046(3146) |                                                         | wR2 (reflections) = 0.2669(4947) |
| S = 1.001                      |                                                         | Npar = 366                       |

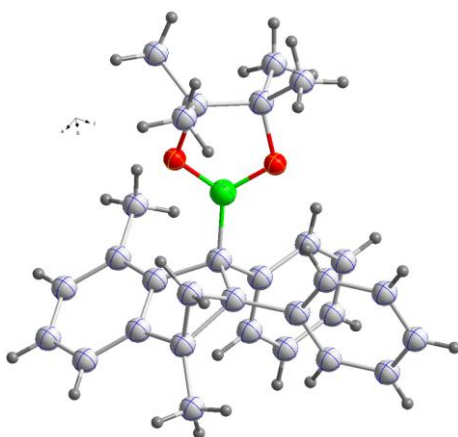

**Structure of 4i' CCDC: 2353044**

**Datablock:**

|                                |                                            |                                  |
|--------------------------------|--------------------------------------------|----------------------------------|
| Bond precision:                | C-C = 0.0043 Å                             | Wavelength = 0.71073             |
| Cell:                          | a = 9.248(3)    b=12.097(4)    c=22.961(8) |                                  |
|                                | alpha=90    beta=100.211(6)    gamma=90    |                                  |
| Temperature:                   | 296 K                                      |                                  |
|                                | Calculated                                 | Reported                         |
| Volume                         | 2528.0(15)                                 | 2528.0(15)                       |
| Space group                    | p 21/n                                     | p 21/n                           |
| Hall group                     | -p 2yn                                     | -p 2yn                           |
| Moiety formula                 | C30 H33 B O2                               | ?                                |
| Sum formula                    | C30 H33 B O2                               | C30 H33 B O2                     |
| Mr                             | 436.37                                     | 436.37                           |
| Dx,g cm-3                      | 1.147                                      | 1.147                            |
| Z                              | 4                                          | 4                                |
| Mu (mm-1)                      | 0.069                                      | 0.069                            |
| F000                           | 936.0                                      | 936.0                            |
| F000'                          | 936.37                                     |                                  |
| h,k,lmax                       | 10,14,27                                   | 10,14,27                         |
| Nref                           | 4442                                       | 4430                             |
| Tmin,Tmax                      |                                            |                                  |
| Tmin'                          |                                            |                                  |
| Correction method = Not given  |                                            |                                  |
| Data completeness = 0.997      |                                            | Theta (max) = 24.999             |
| R (reflections) = 0.0752(3535) |                                            | wR2 (reflections) = 0.2784(4430) |
| S = 1.049                      |                                            | Npar = 304                       |

## 9. References

- (1) Tripathi, C. B.; Mukherjee, S. *Angew. Chem. Int. Ed.* **2013**, *52*, 8450.
- (2) Huang, Q.; Larock, R. C. *J. Org. Chem.* **2003**, *68*, 7342;
- (3) Yao, T.; Zhang, H.; Zhao, Y. *Org. Lett.* **2016**, *18*, 2532;
- (4) Emer, E.; Pfeifer, L.; Brown, J. M.; Gouverneur, V. *Angew. Chem. Int. Ed.* **2014**, *53*, 4181.
- (5) Lou, Z.; Zhang, S.; Chen, C.; Pang, X.; Li, M.; Wen, L. *Adv. Synth. Catal.* **2014**, *356*, 153.
- (6) Jia, X.; Petrone, D. A.; Lautens, M. *Angew. Chem. Int. Ed.* **2012**, *51*, 9870.
- (7) Schmidt, B.; Berger, R.; Kelling, A.; Schilde, U. *Chem. Eur. J.* **2011**, *17*, 7032.
- (8) Lee, D.-H.; Kwon, Y.-J.; Jin, M.-J. *Adv. Synth. Catal.* **2011**, *353*, 3090.

## 10. NMR Spectra

$^1\text{H}$  NMR (400 MHz,  $\text{CDCl}_3$ ) Spectrum of **4a**

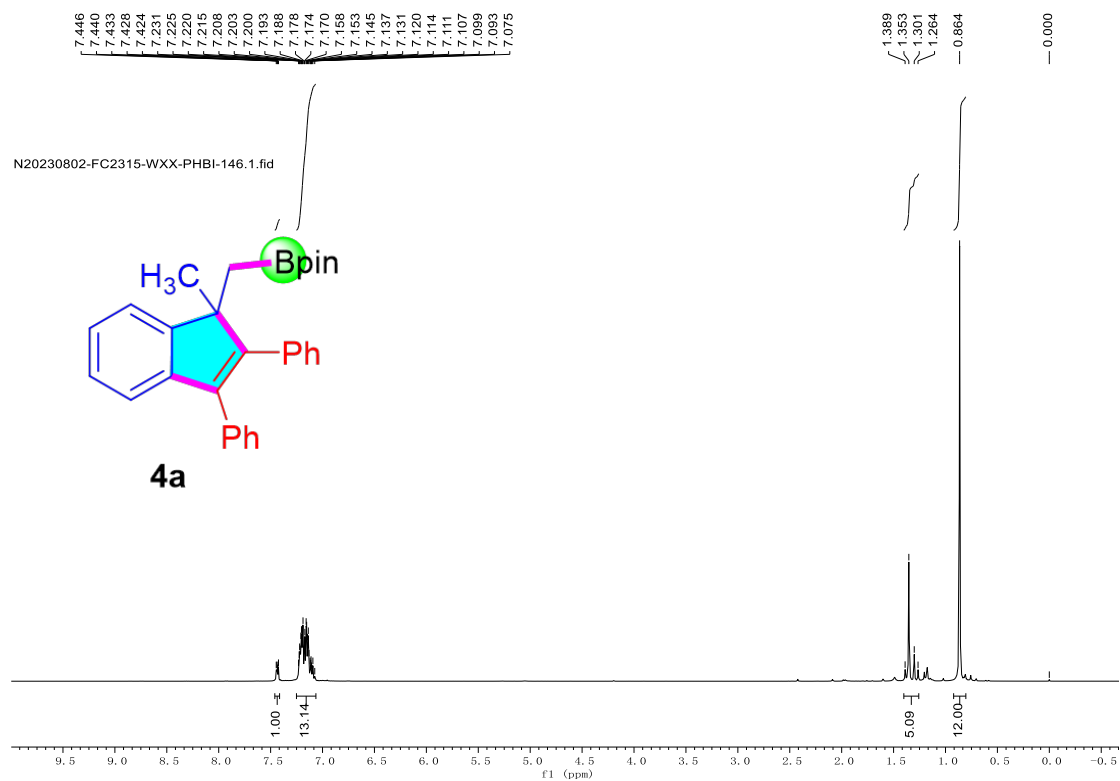

$^{13}\text{C}\{^1\text{H}\}$  NMR (101 MHz,  $\text{CDCl}_3$ ) Spectrum of **4a**

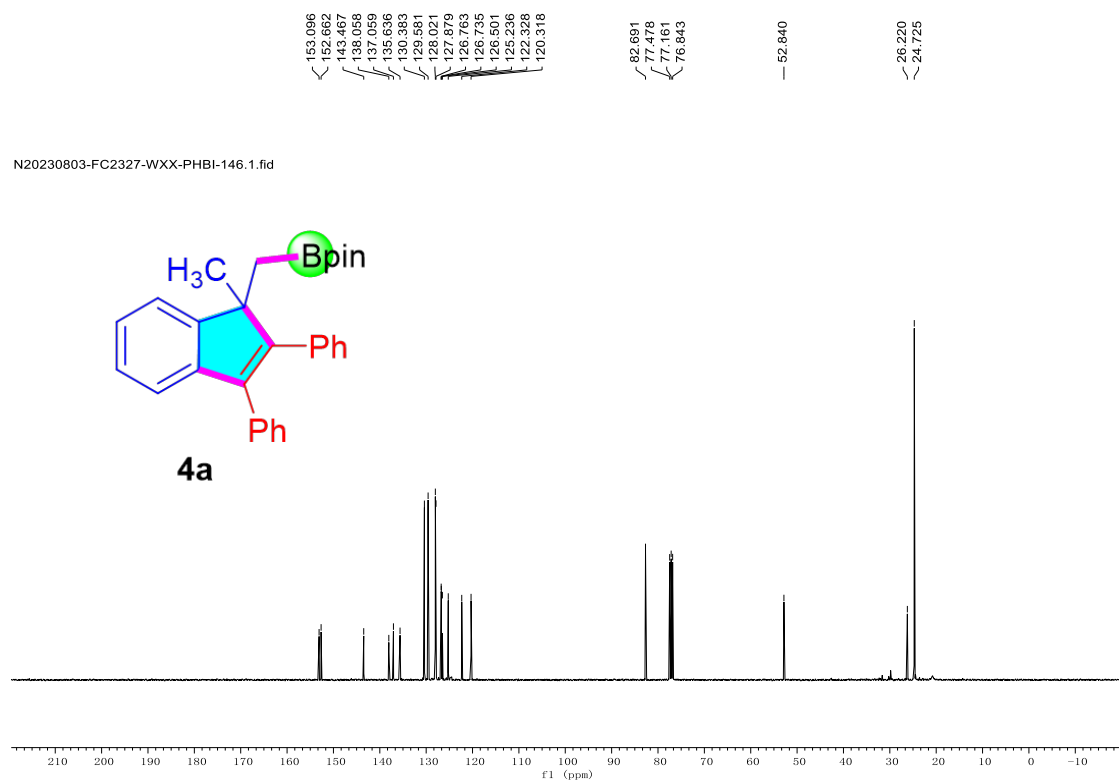

### $^1\text{H}$ NMR (400 MHz, $\text{CDCl}_3$ ) Spectrum of **4b**

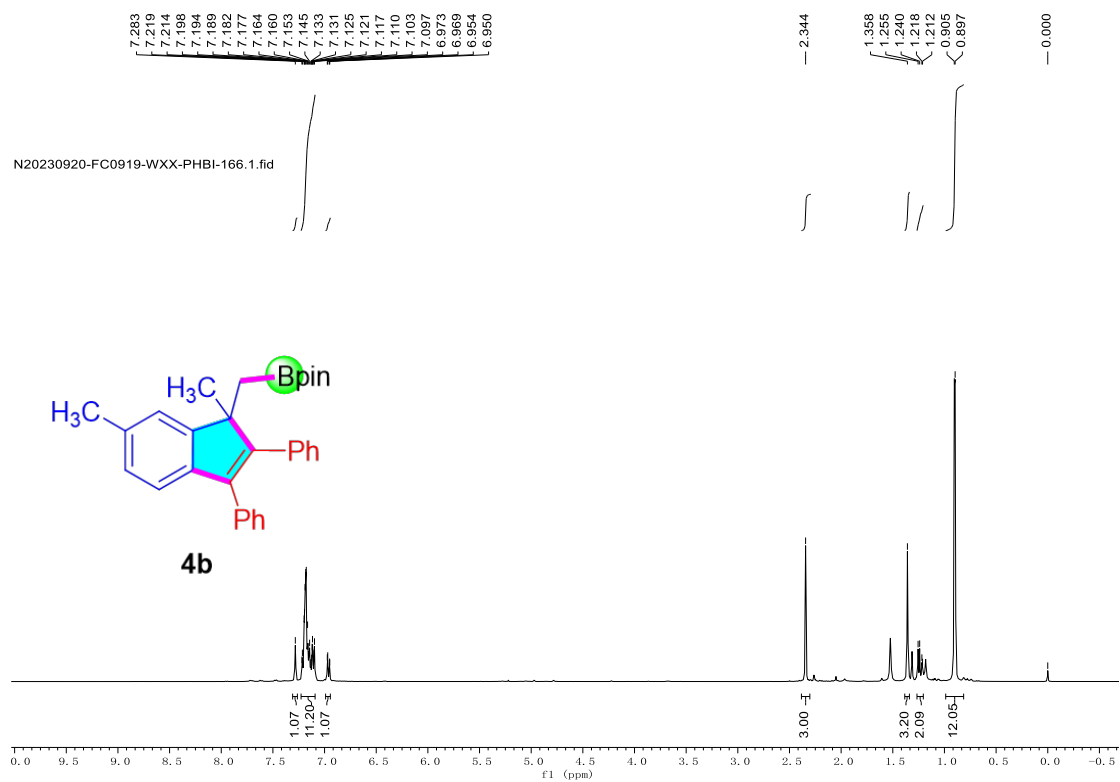

### $^{13}\text{C}\{^1\text{H}\}$ NMR (101 MHz, $\text{CDCl}_3$ ) Spectrum of **4b**

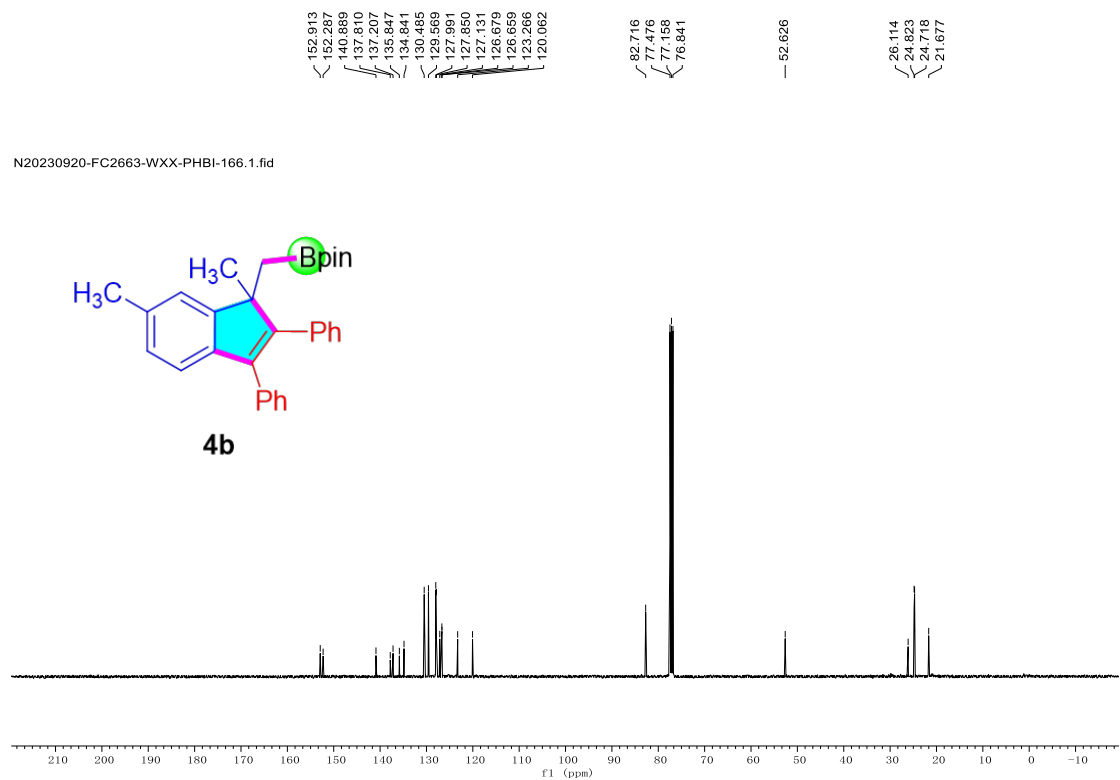

<sup>1</sup>H NMR (400 MHz, CDCl<sub>3</sub>) Spectrum of **4c**

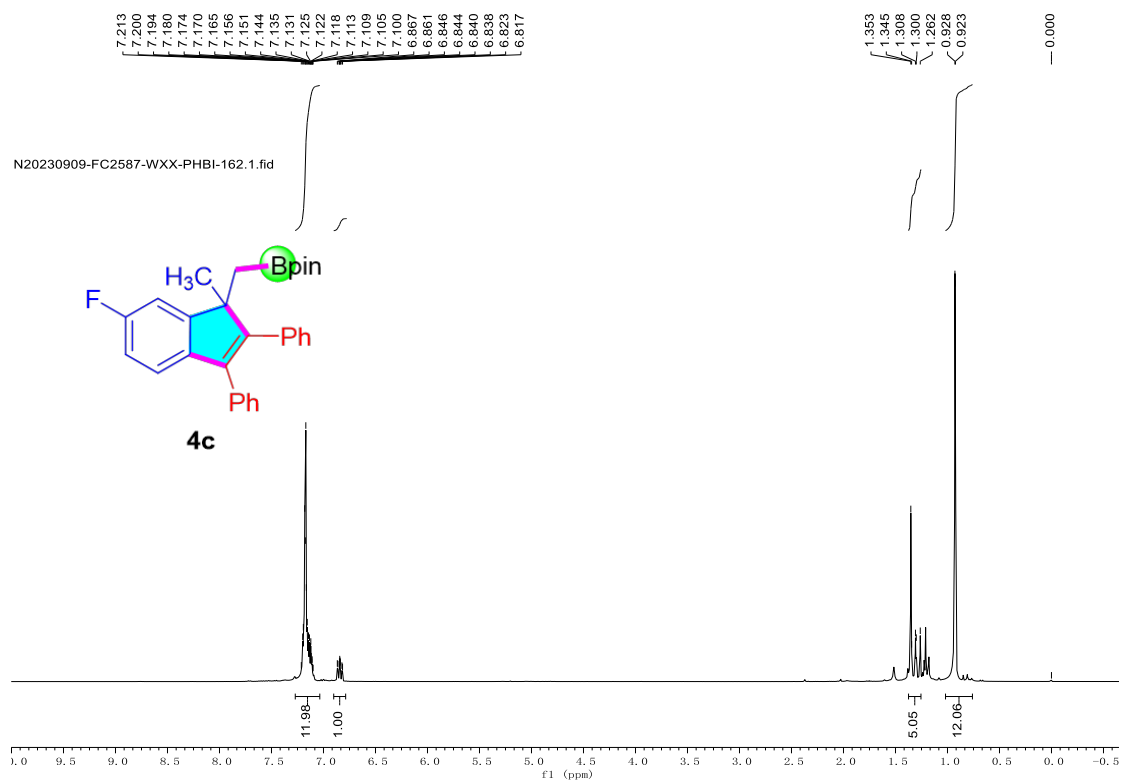

<sup>13</sup>C{<sup>1</sup>H} NMR (101 MHz, CDCl<sub>3</sub>) Spectrum of **4c**

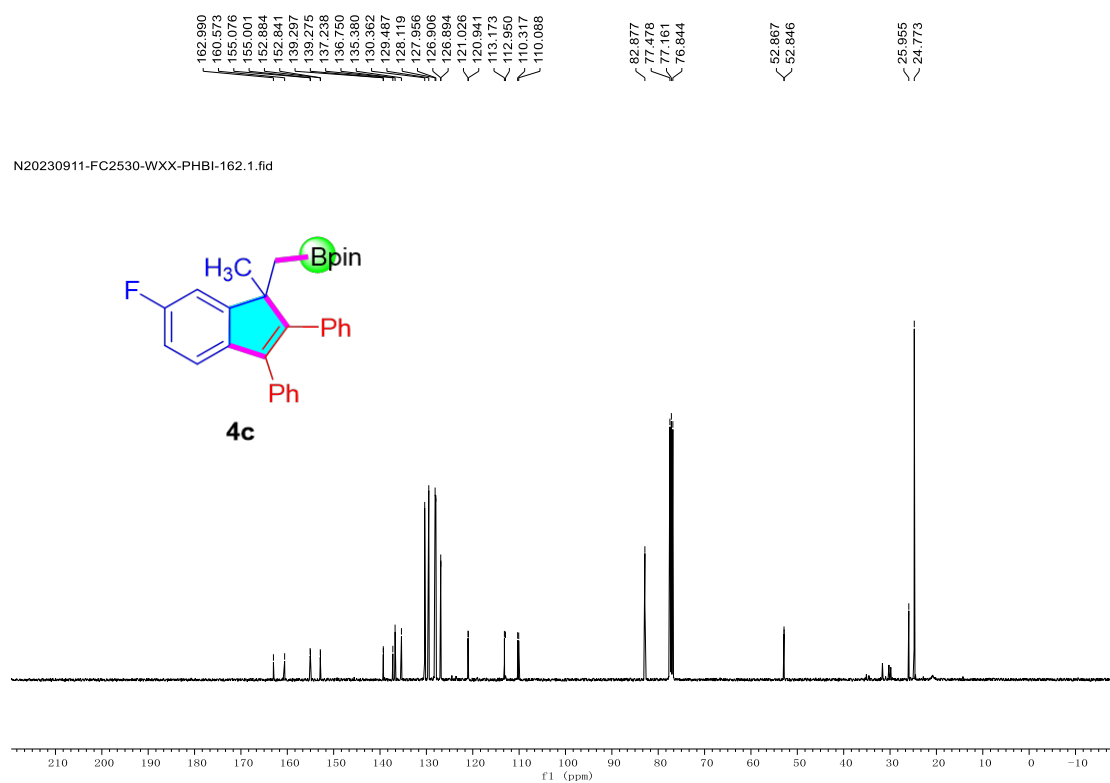

$^{19}\text{F}$  NMR (376 MHz,  $\text{CDCl}_3$ ) Spectrum of **4c**

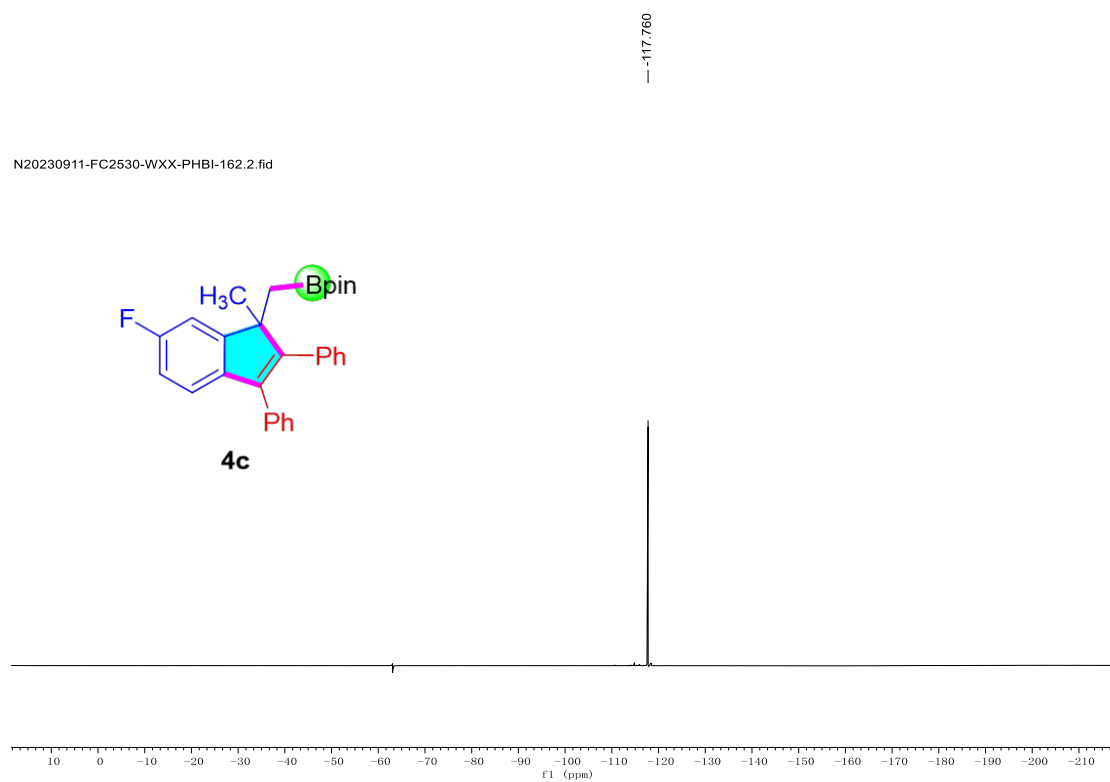



<sup>1</sup>H NMR (400 MHz, CDCl<sub>3</sub>) Spectrum of **4d**

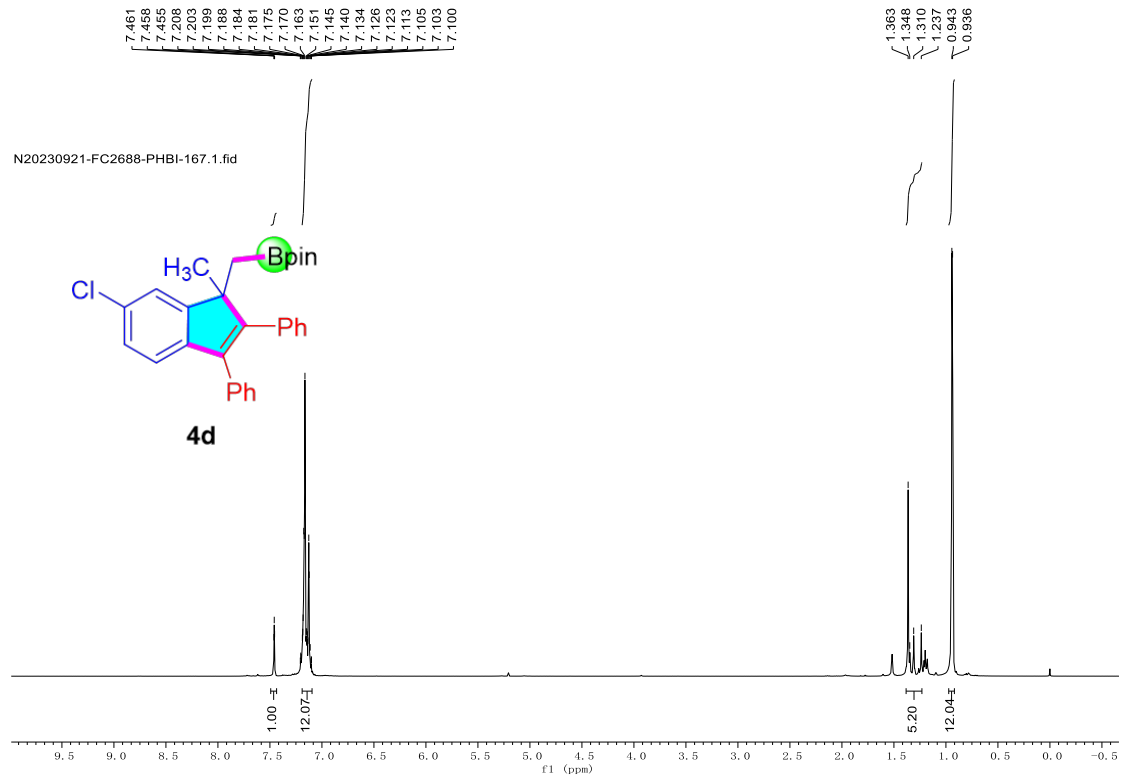

<sup>13</sup>C{<sup>1</sup>H} NMR (101 MHz, CDCl<sub>3</sub>) Spectrum of **4d**

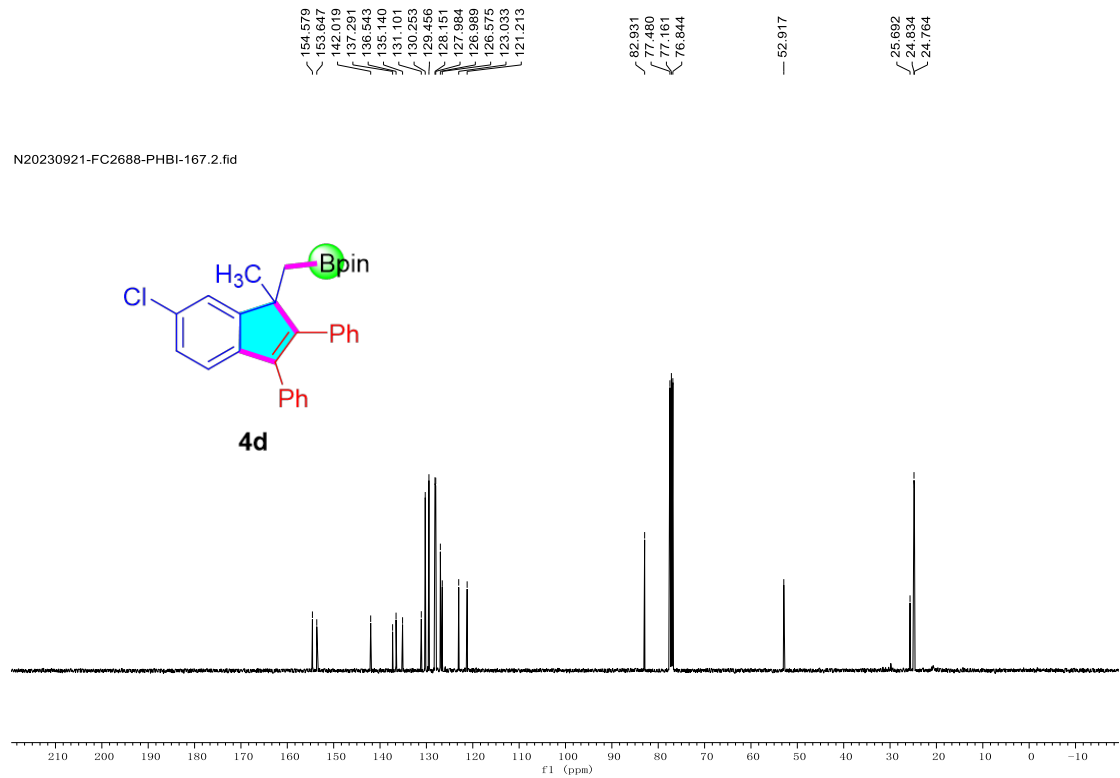

<sup>1</sup>H NMR (400 MHz, CDCl<sub>3</sub>) Spectrum of **4e**

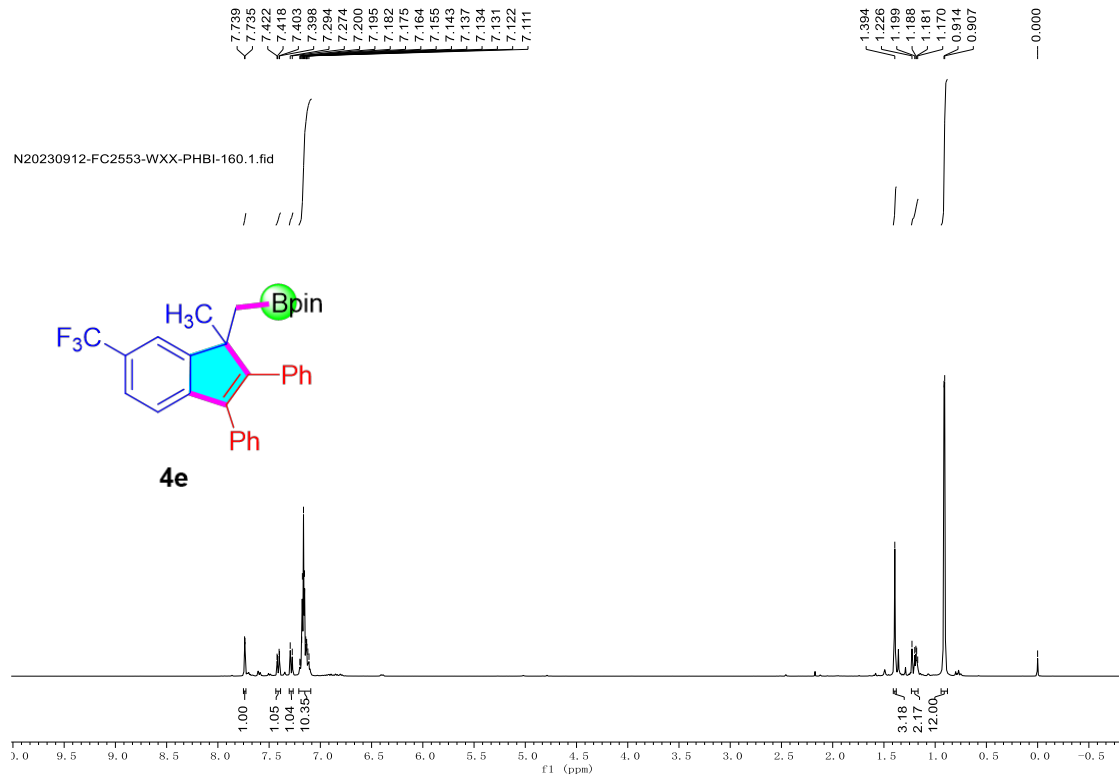

<sup>13</sup>C{<sup>1</sup>H} NMR (101 MHz, CDCl<sub>3</sub>) Spectrum of **4e**

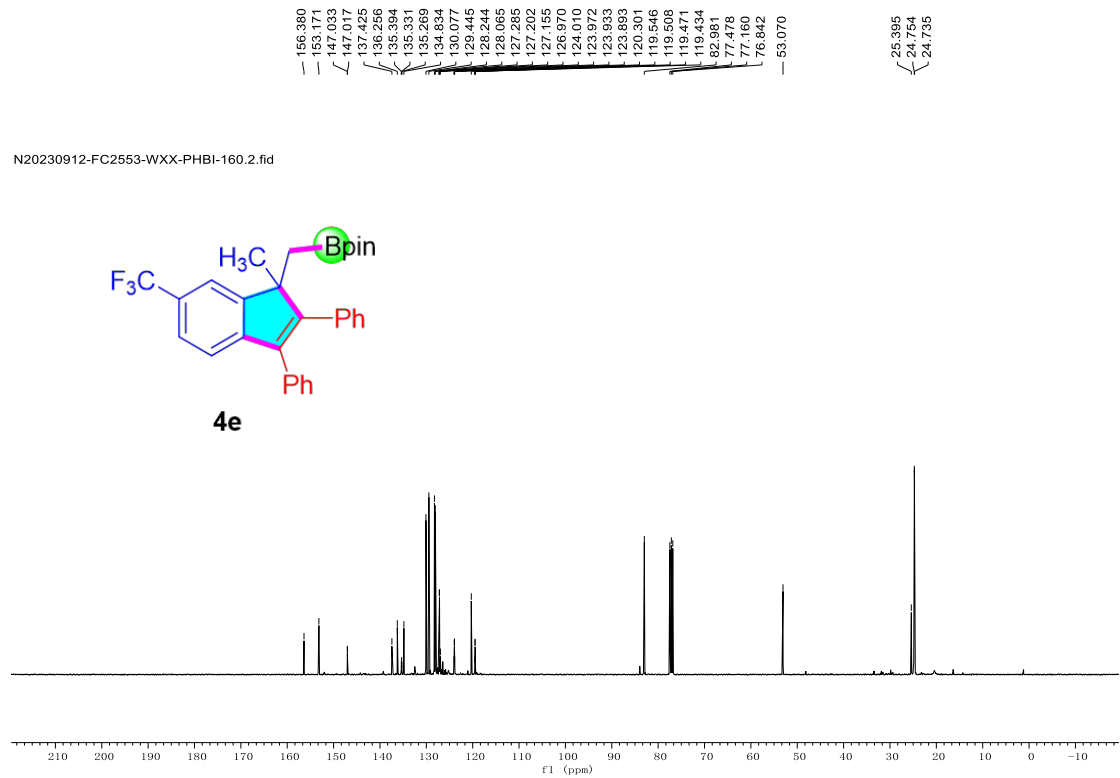

$^{19}\text{F}$  NMR (376 MHz,  $\text{CDCl}_3$ ) Spectrum of **4e**

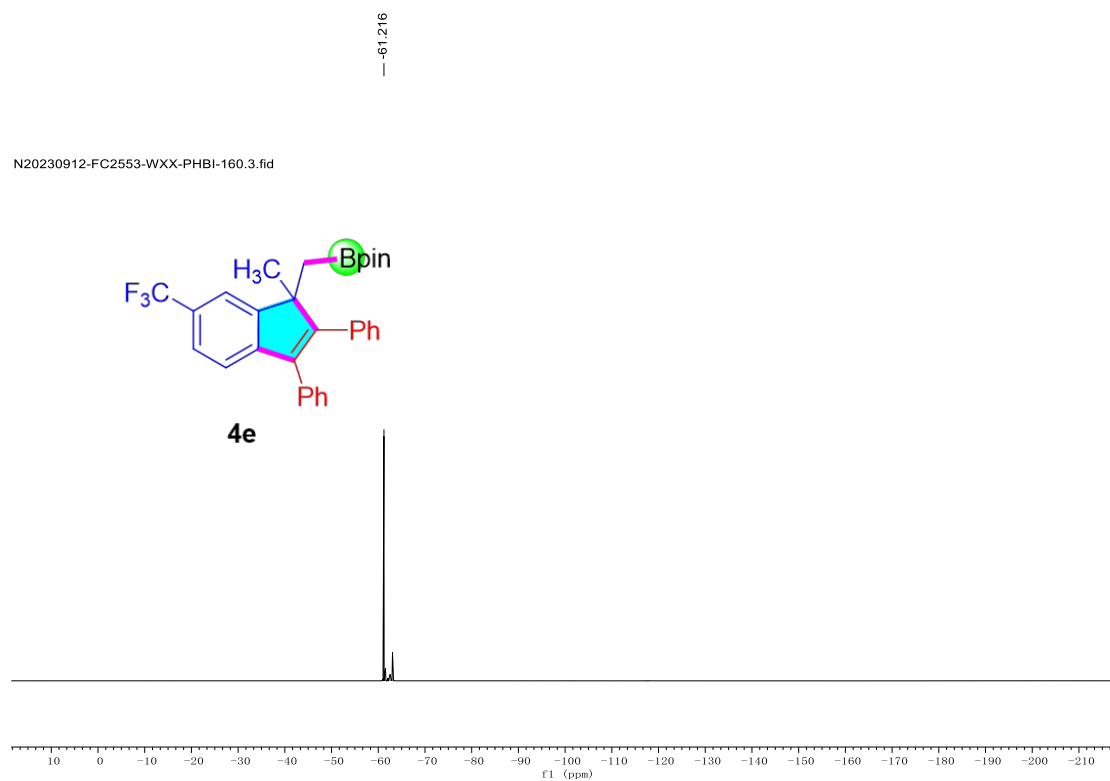

<sup>1</sup>H NMR (400 MHz, CDCl<sub>3</sub>) Spectrum of **4f**

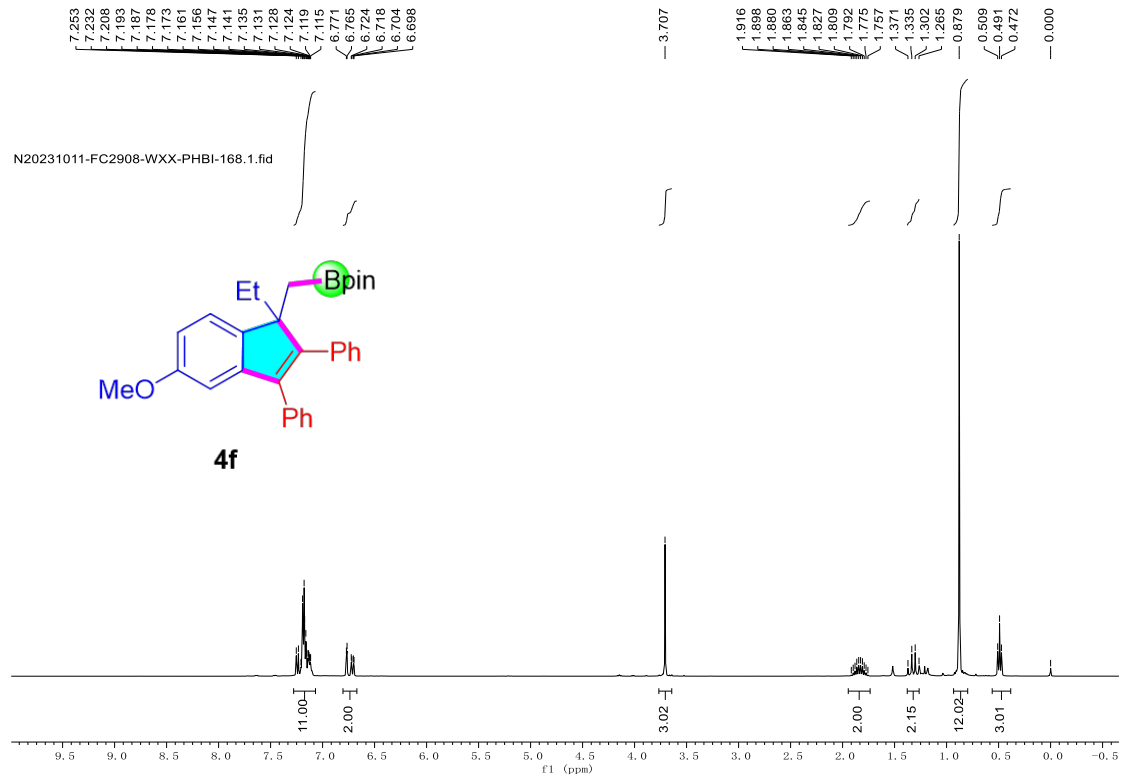

<sup>13</sup>C{<sup>1</sup>H} NMR (101 MHz, CDCl<sub>3</sub>) Spectrum of **4f**

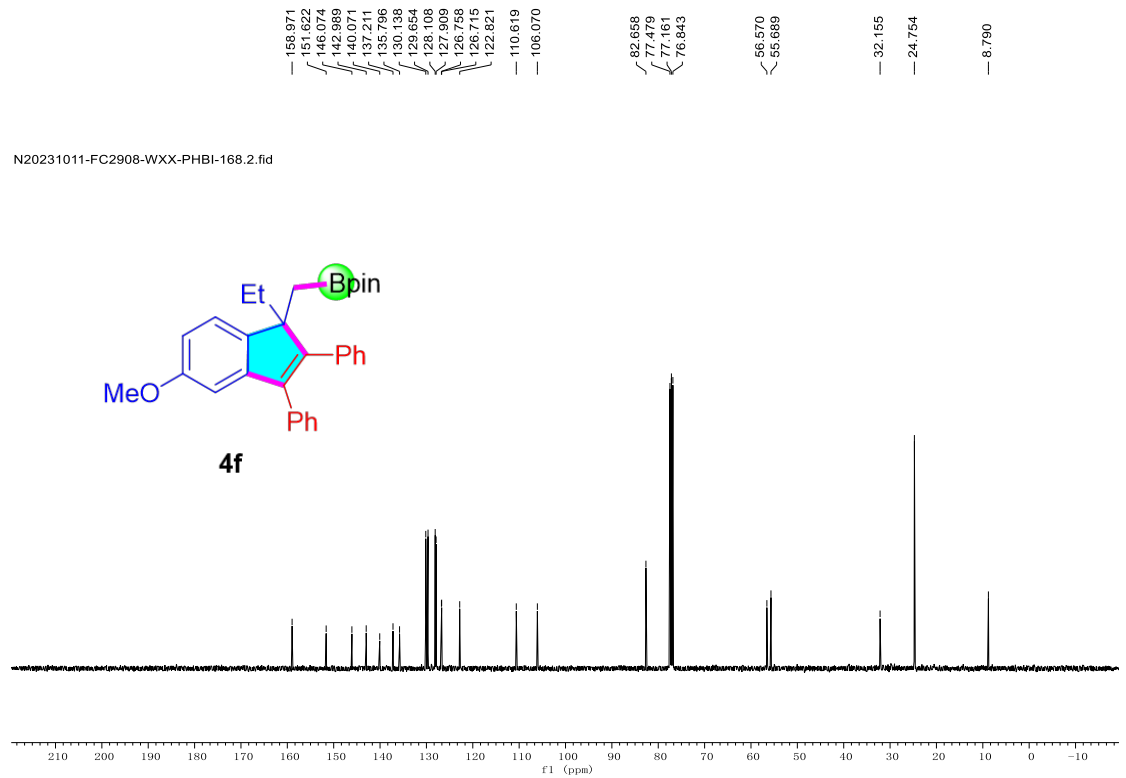

<sup>1</sup>H NMR (400 MHz, CDCl<sub>3</sub>) Spectrum of **4g**

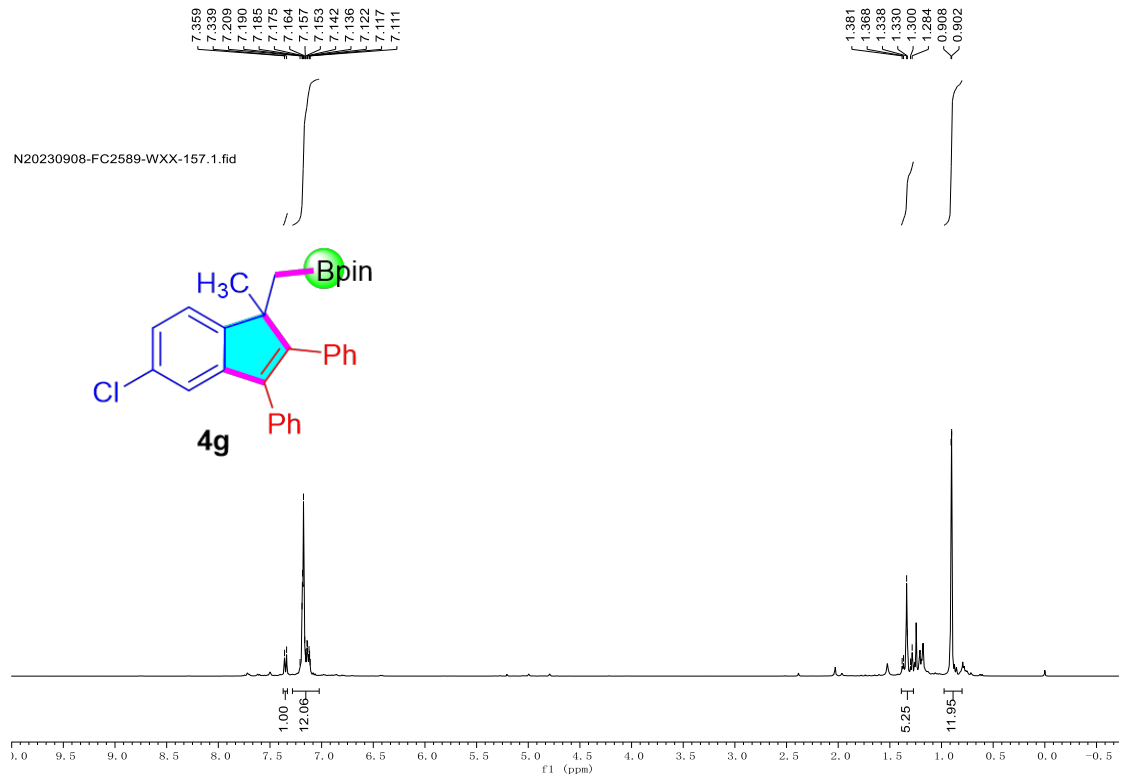

<sup>13</sup>C{<sup>1</sup>H} NMR (101 MHz, CDCl<sub>3</sub>) Spectrum of **4g**

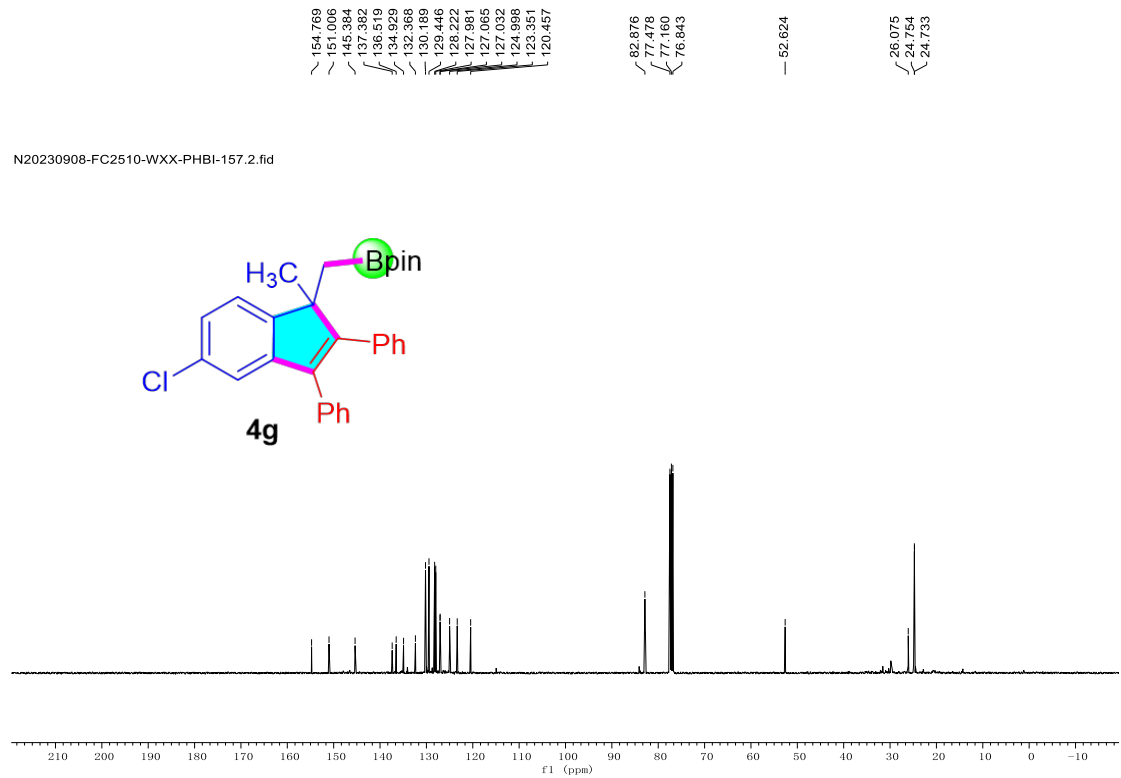

### <sup>1</sup>H NMR (400 MHz, CDCl<sub>3</sub>) Spectrum of **4h**

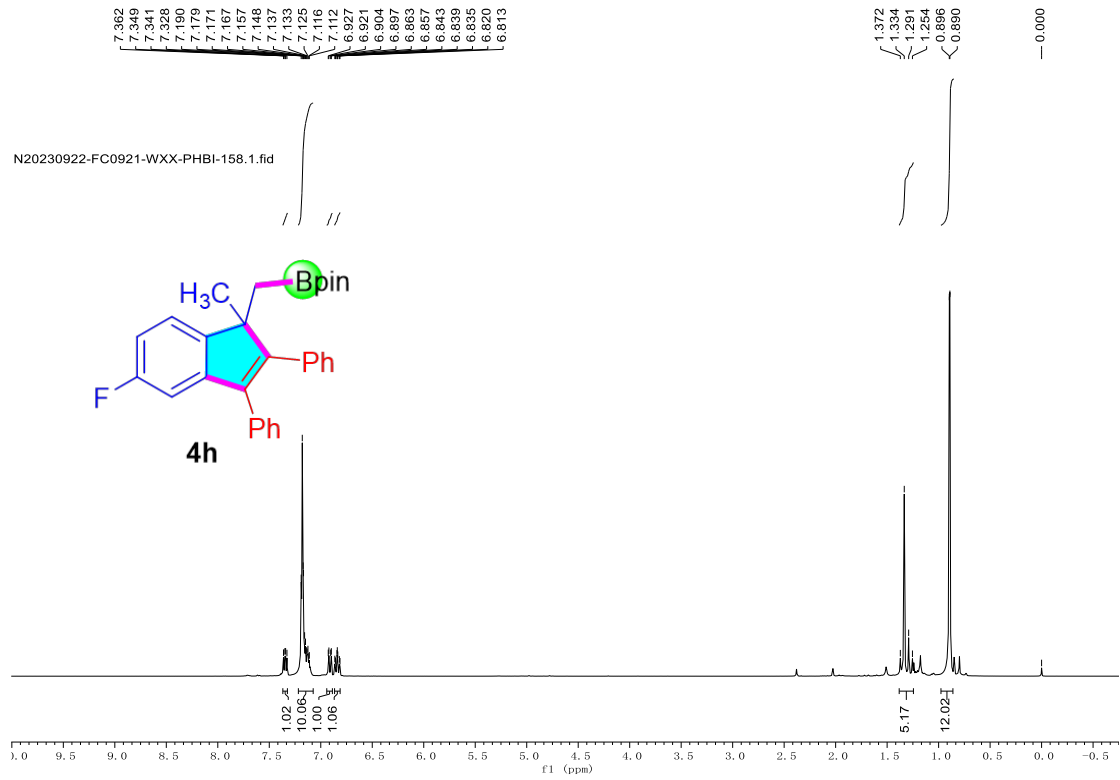

### <sup>13</sup>C{<sup>1</sup>H} NMR (101 MHz, CDCl<sub>3</sub>) Spectrum of **4h**

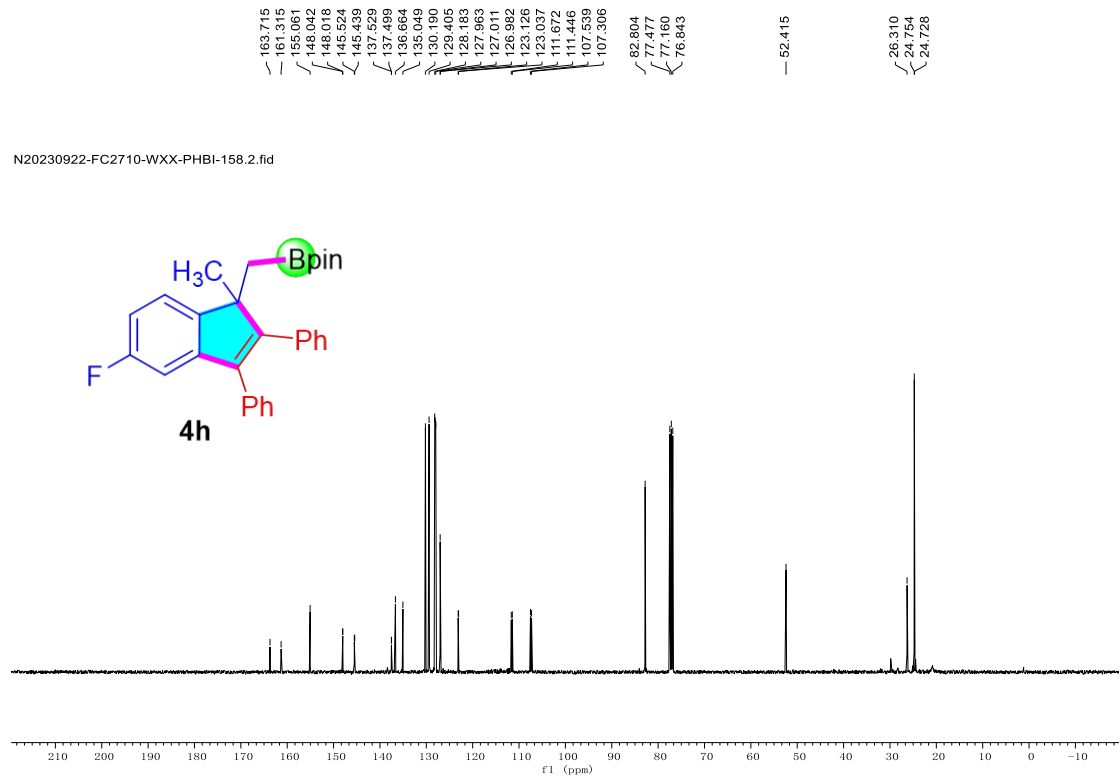

$^{19}\text{F}$  NMR (376 MHz,  $\text{CDCl}_3$ ) Spectrum of **4h**

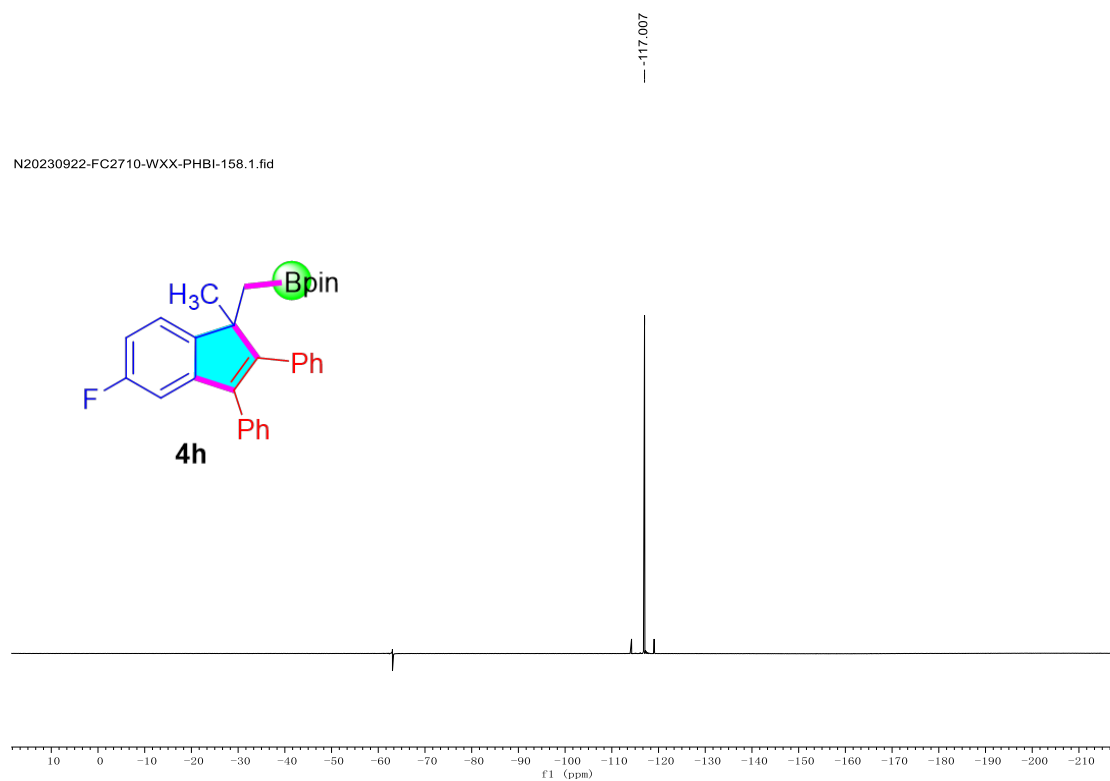

<sup>1</sup>H NMR (400 MHz, CDCl<sub>3</sub>) Spectrum of **4i**

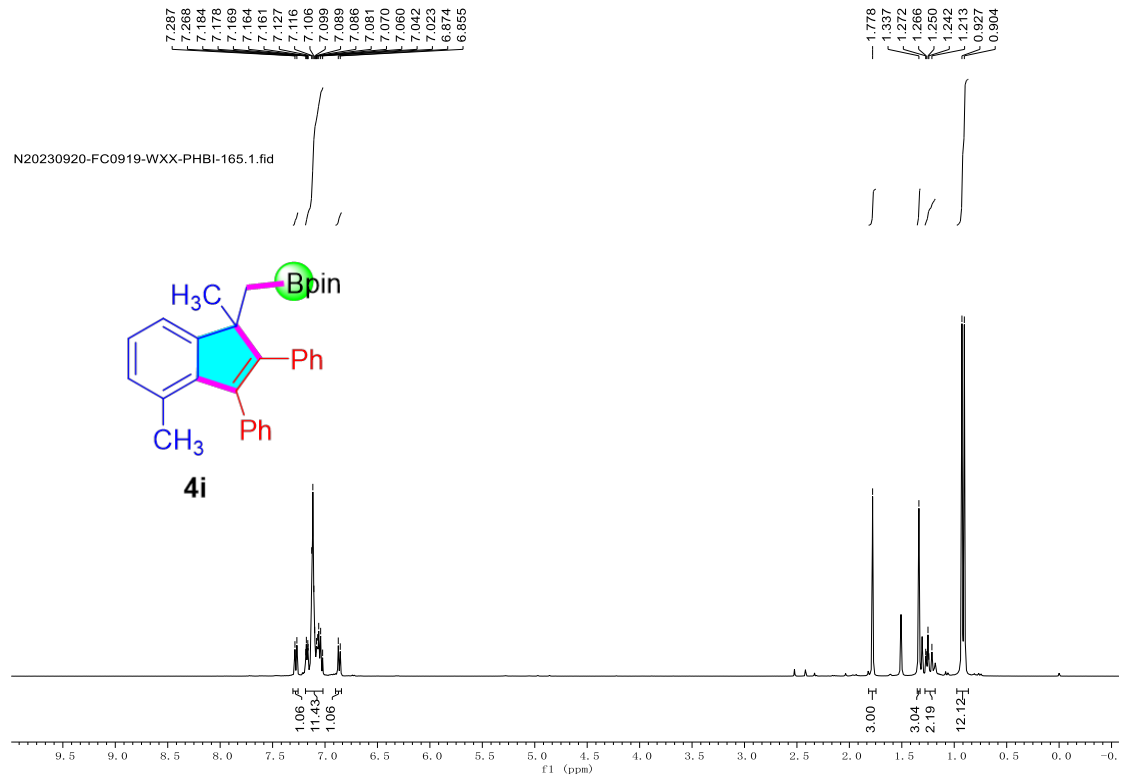

<sup>13</sup>C {<sup>1</sup>H} NMR (101 MHz, CDCl<sub>3</sub>) Spectrum of **4i**

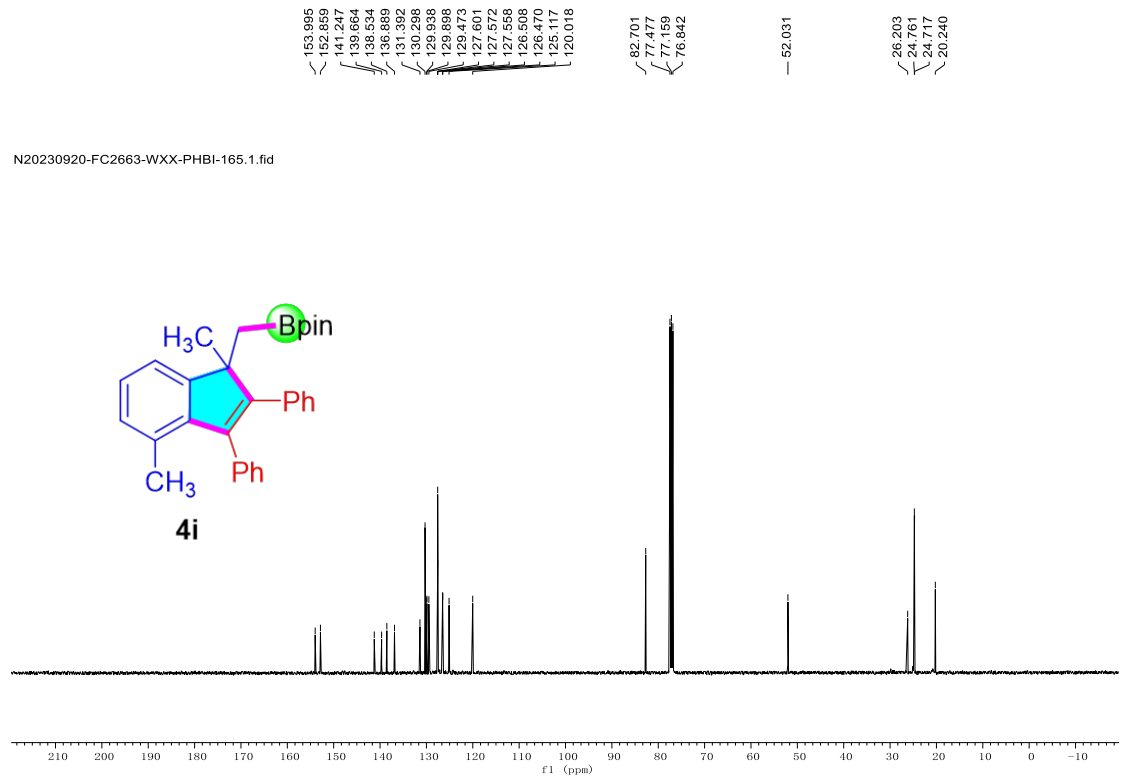



<sup>1</sup>H NMR (400 MHz, CDCl<sub>3</sub>) Spectrum of **4j**

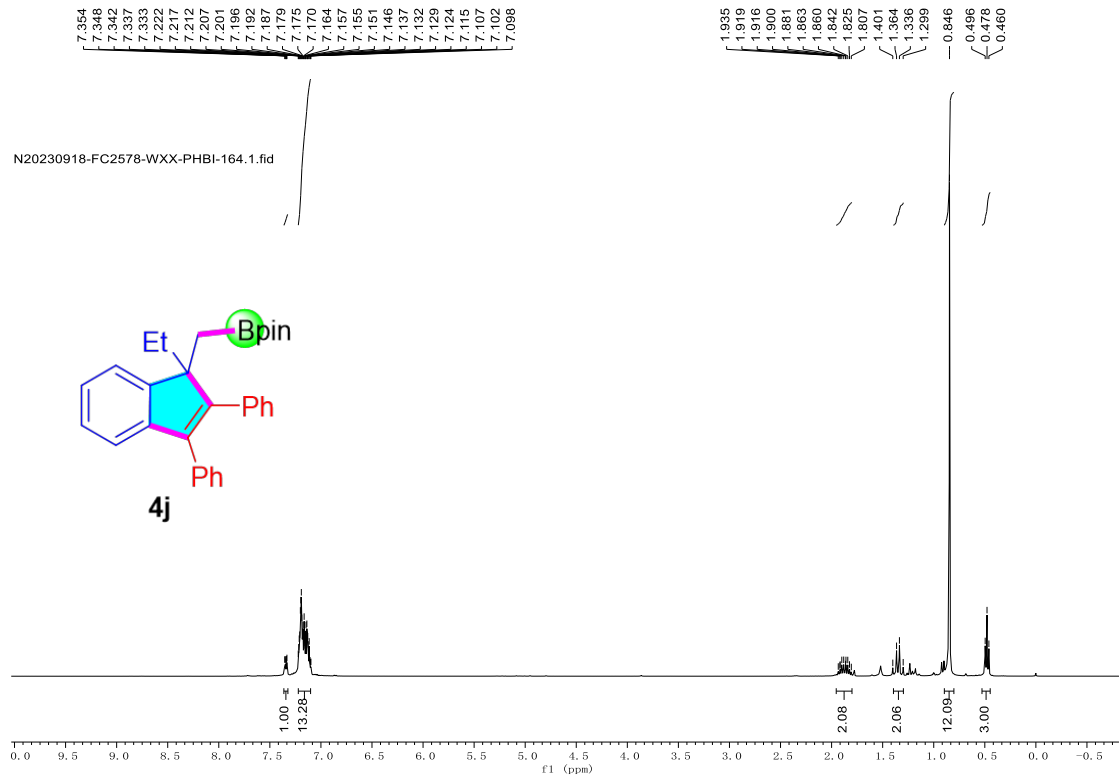

<sup>13</sup>C{<sup>1</sup>H} NMR (101 MHz, CDCl<sub>3</sub>) Spectrum of **4j**

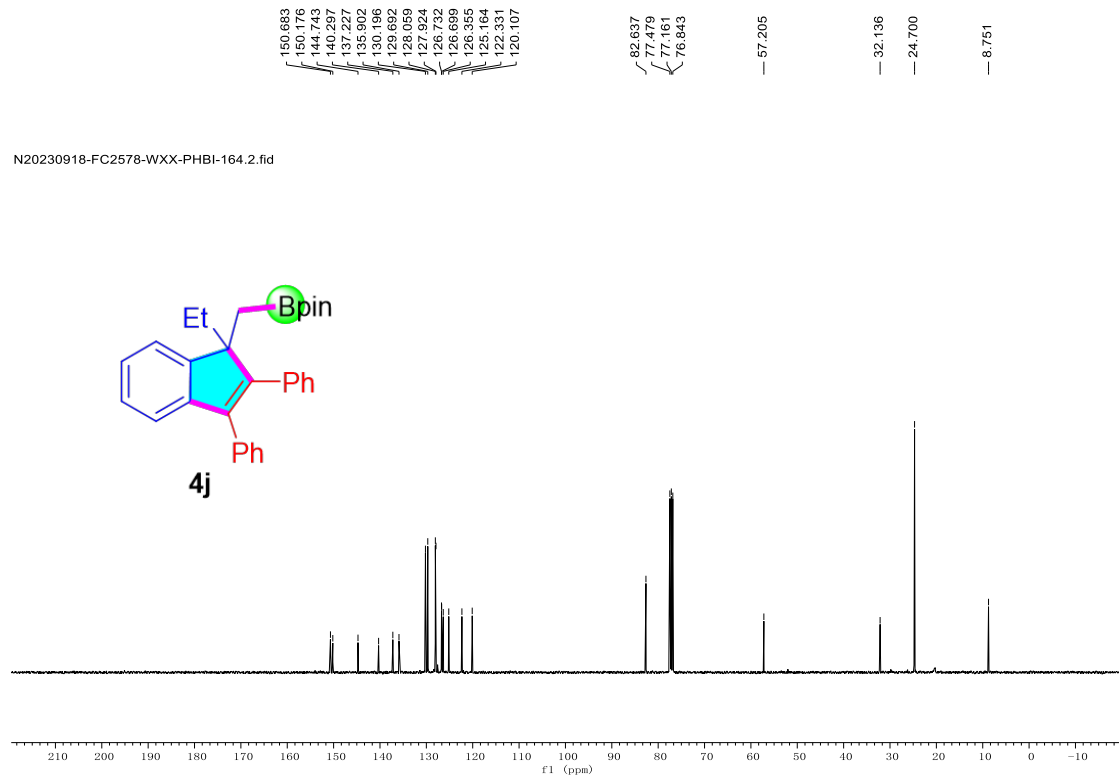

### $^1\text{H}$ NMR (400 MHz, $\text{CDCl}_3$ ) Spectrum of **4k**

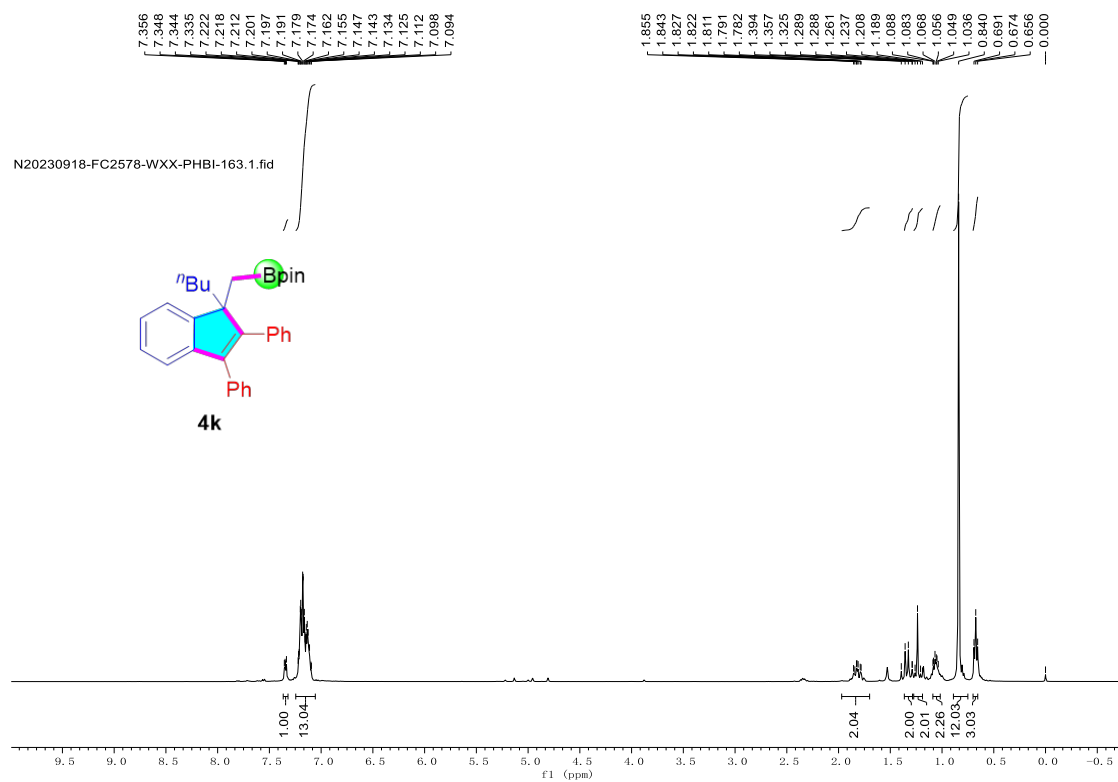

### $^{13}\text{C}\{^1\text{H}\}$ NMR (101 MHz, $\text{CDCl}_3$ ) Spectrum of **4k**

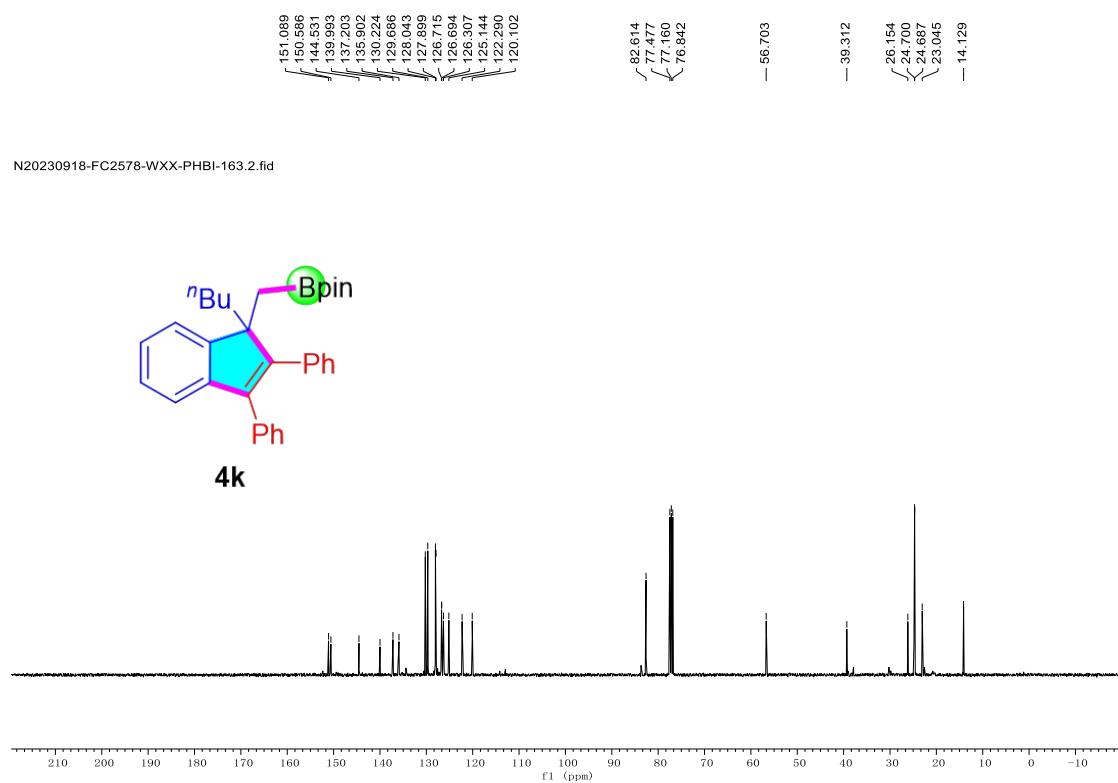

### <sup>1</sup>H NMR (400 MHz, CDCl<sub>3</sub>) Spectrum of **4m**

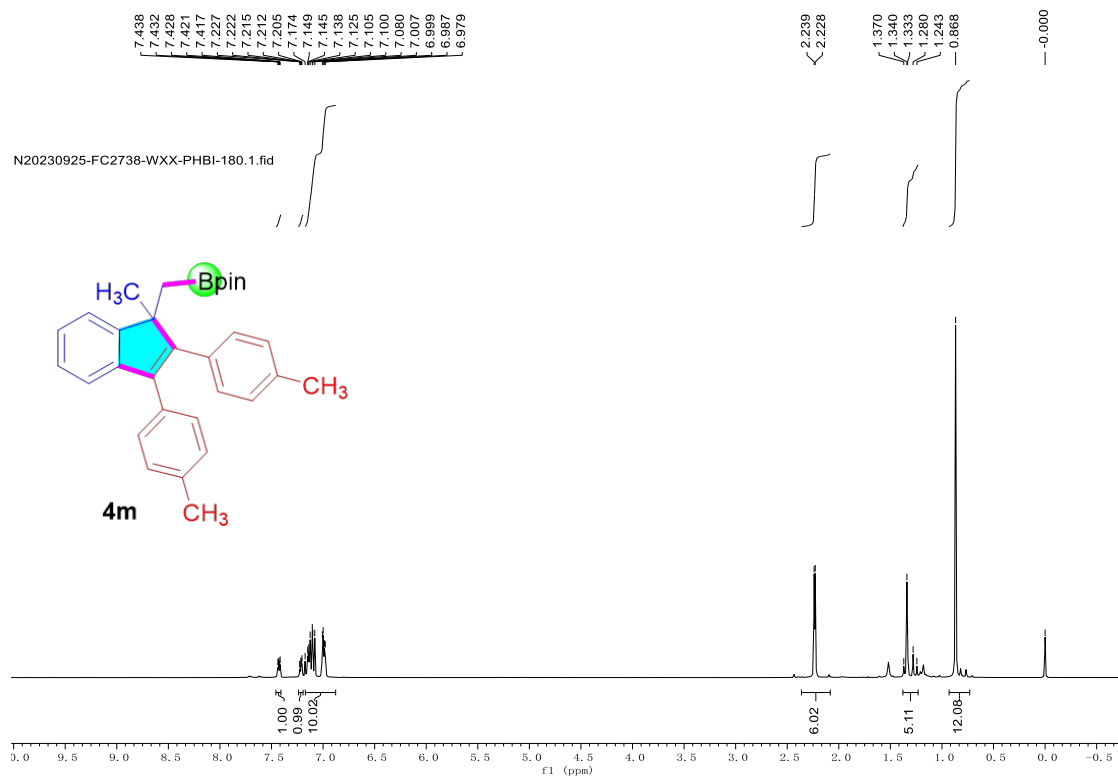

### <sup>13</sup>C{<sup>1</sup>H} NMR (101 MHz, CDCl<sub>3</sub>) Spectrum of **4m**

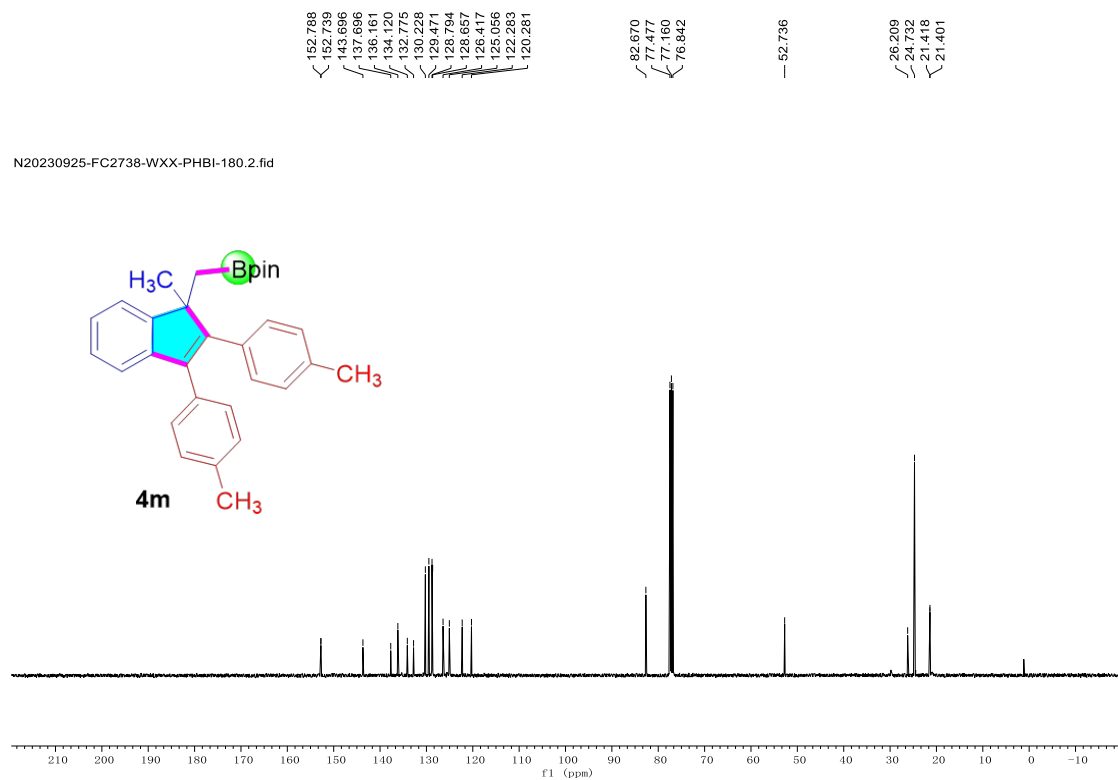

# <sup>1</sup>H NMR (400 MHz, CDCl<sub>3</sub>) Spectrum of **4n**

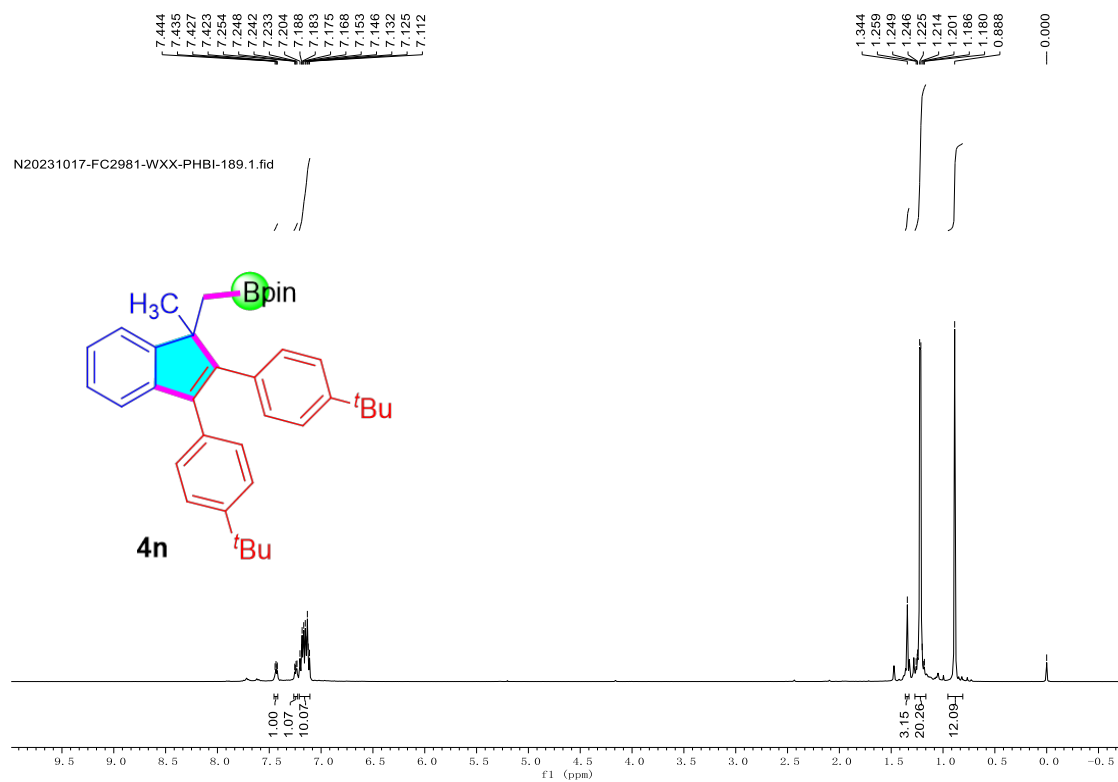

# <sup>13</sup>C{<sup>1</sup>H} NMR (101 MHz, CDCl<sub>3</sub>) Spectrum of **4n**

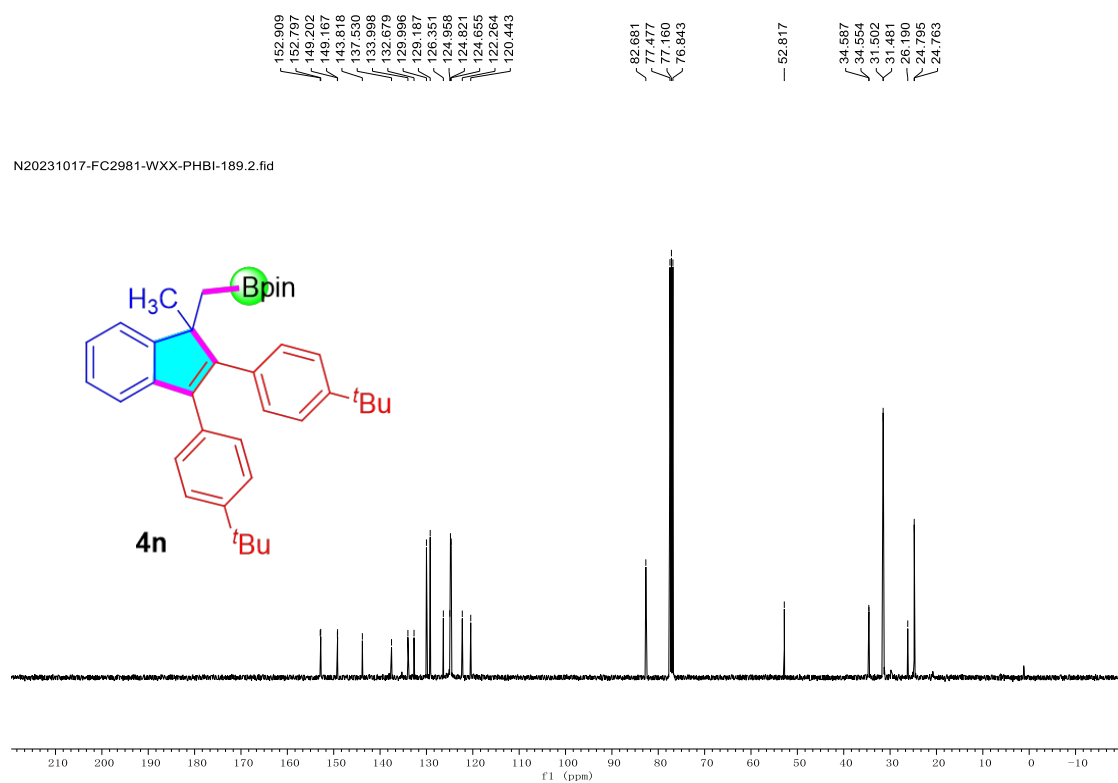

<sup>1</sup>H NMR (400 MHz, CDCl<sub>3</sub>) Spectrum of **4o**

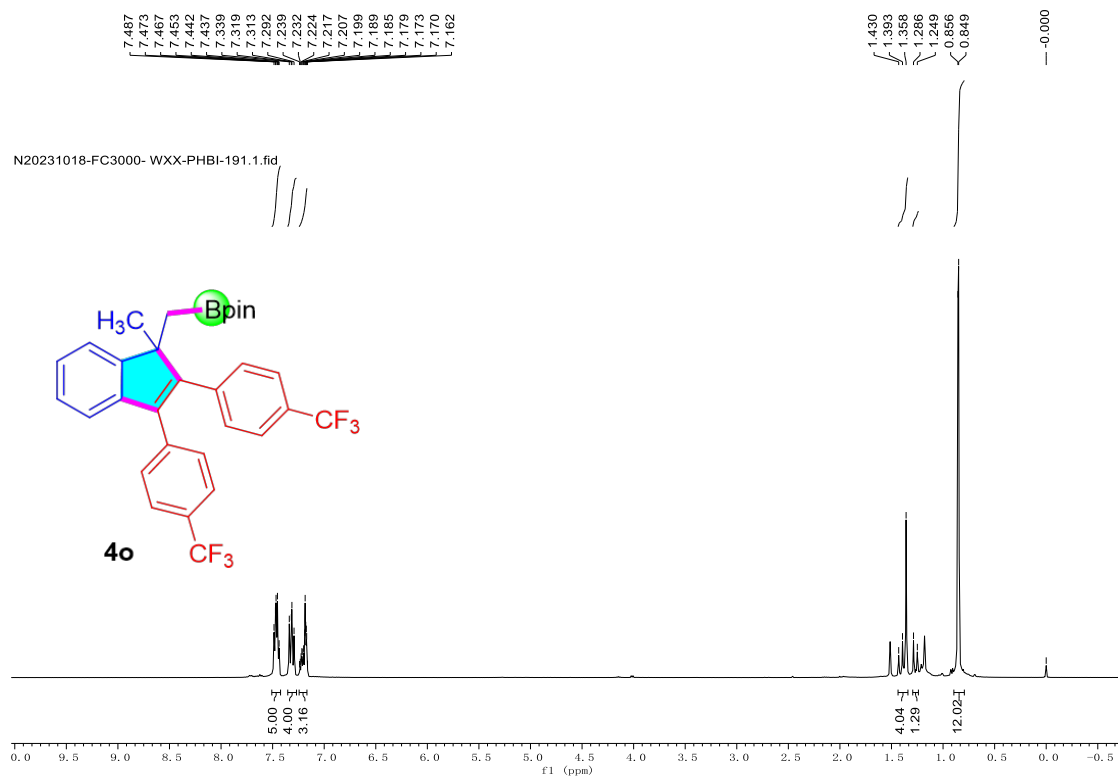

<sup>13</sup>C{<sup>1</sup>H} NMR (101 MHz, CDCl<sub>3</sub>) Spectrum of **4o**

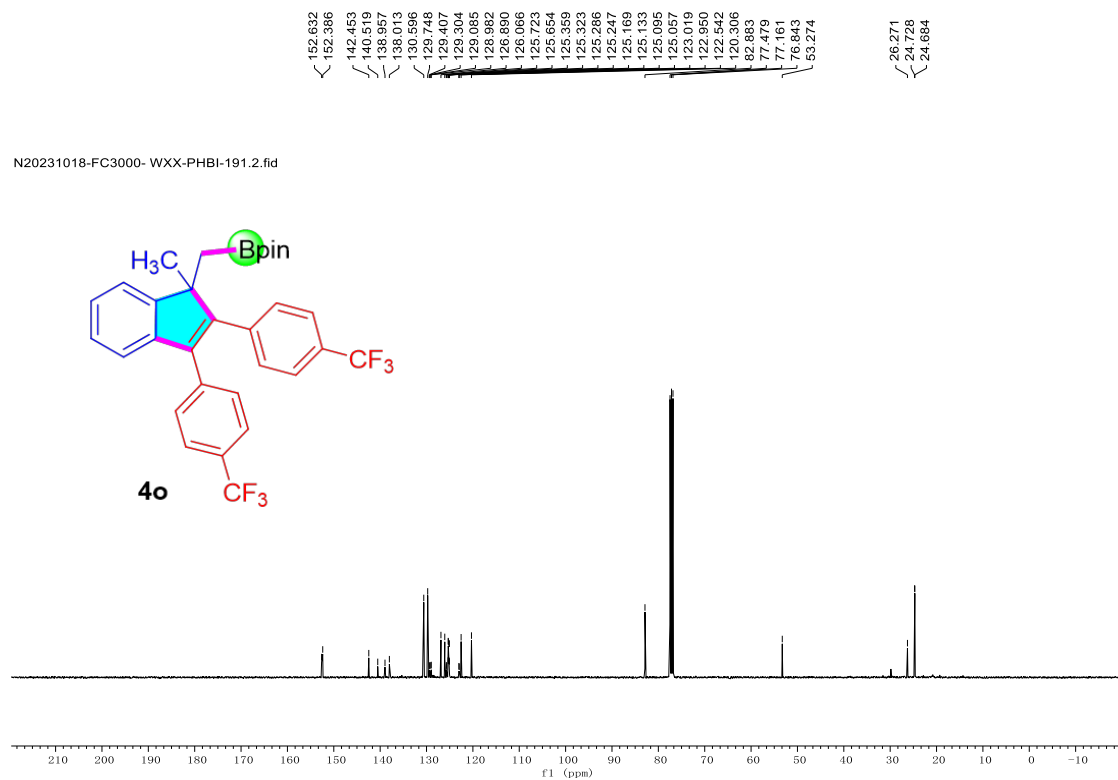

$^{19}\text{F}$  NMR (376 MHz,  $\text{CDCl}_3$ ) Spectrum of **4o**

-62.442  
-62.449

N20231018-FC3000- WXX-PHBI-191.3.fid

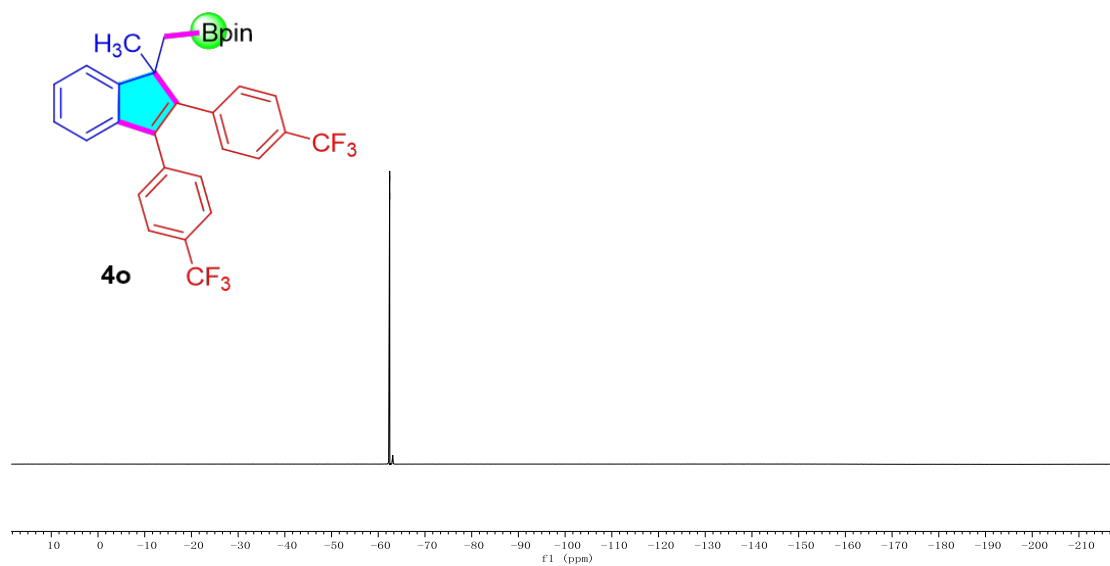

<sup>1</sup>H NMR (400 MHz, CDCl<sub>3</sub>) Spectrum of **4p**

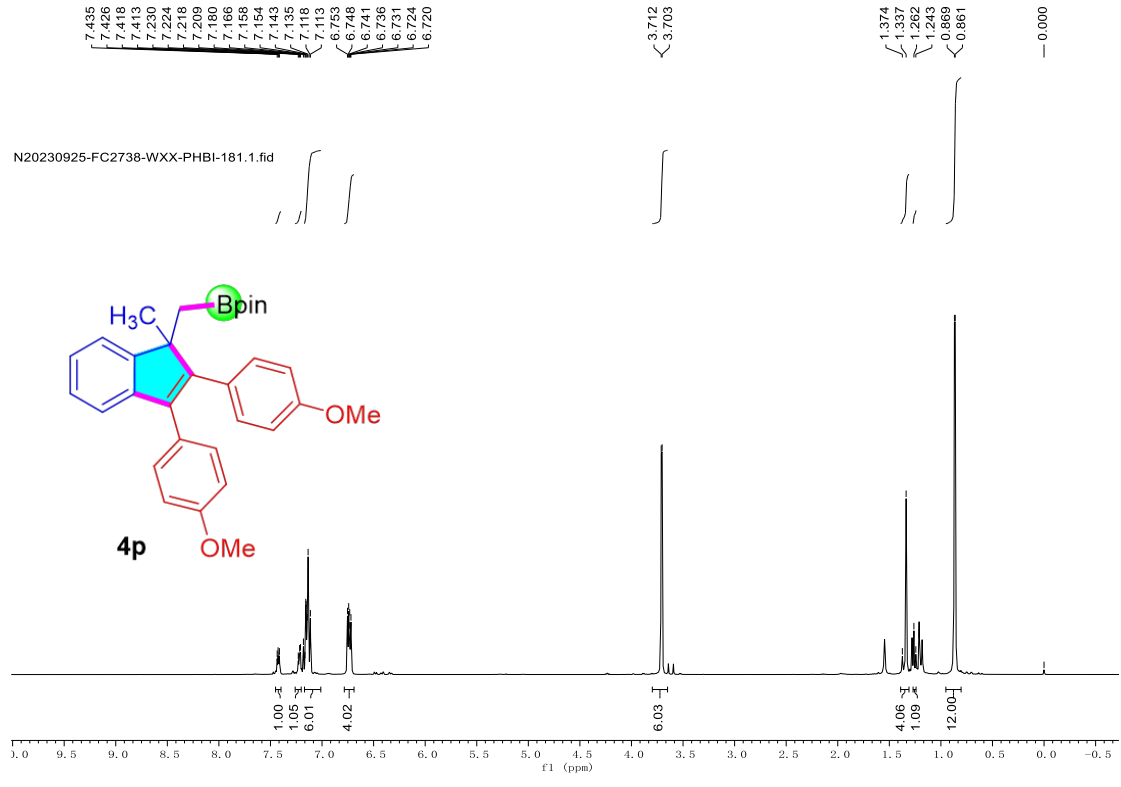

<sup>13</sup>C{<sup>1</sup>H} NMR (101 MHz, CDCl<sub>3</sub>) Spectrum of **4p**

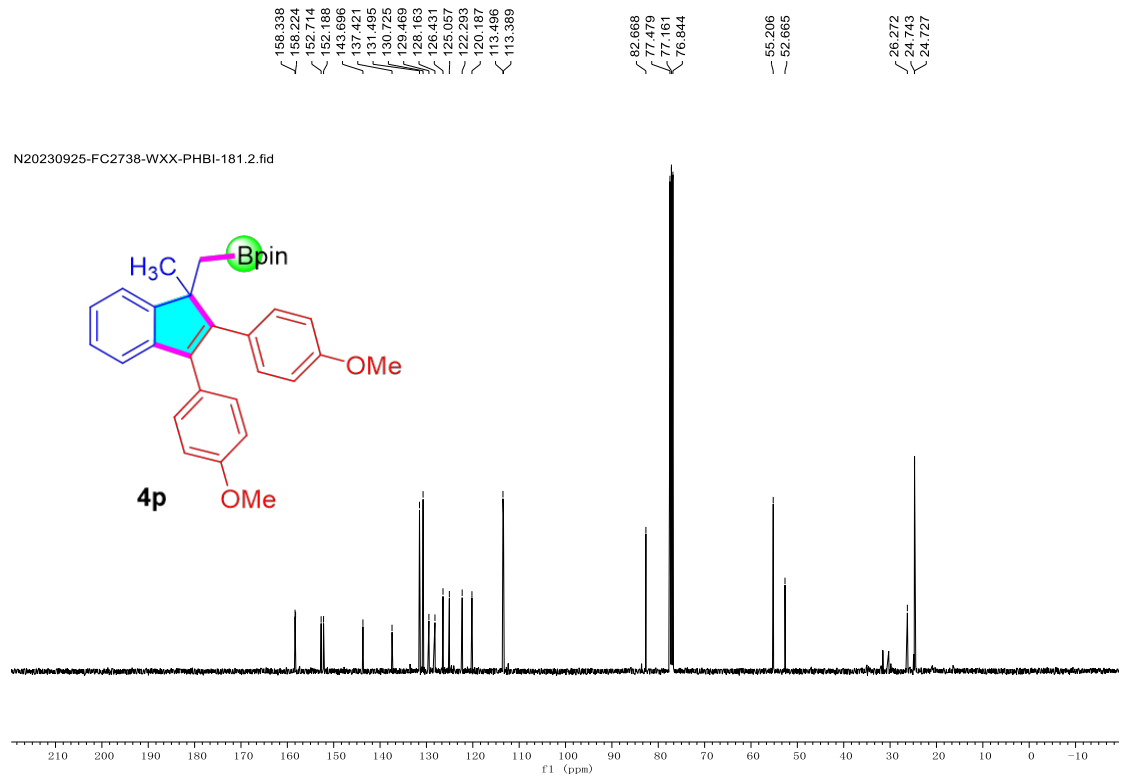

# <sup>1</sup>H NMR (400 MHz, CDCl<sub>3</sub>) Spectrum of 4q

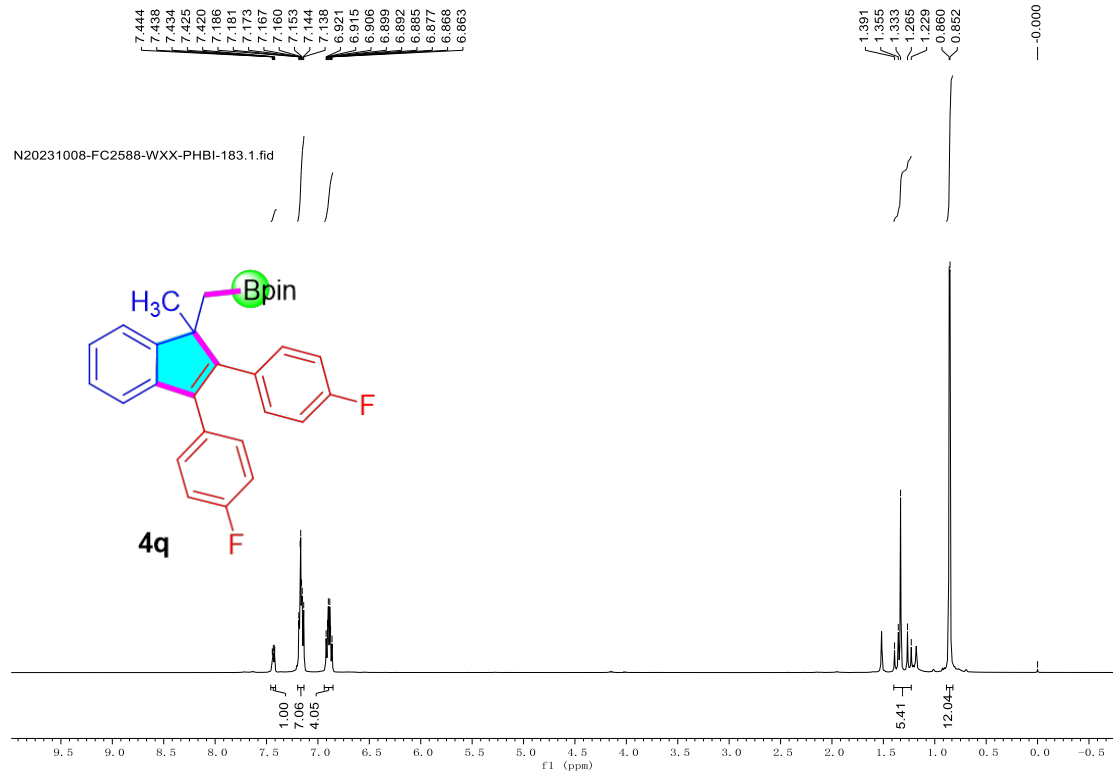

# <sup>13</sup>C{<sup>1</sup>H} NMR (101 MHz, CDCl<sub>3</sub>) Spectrum of 4q

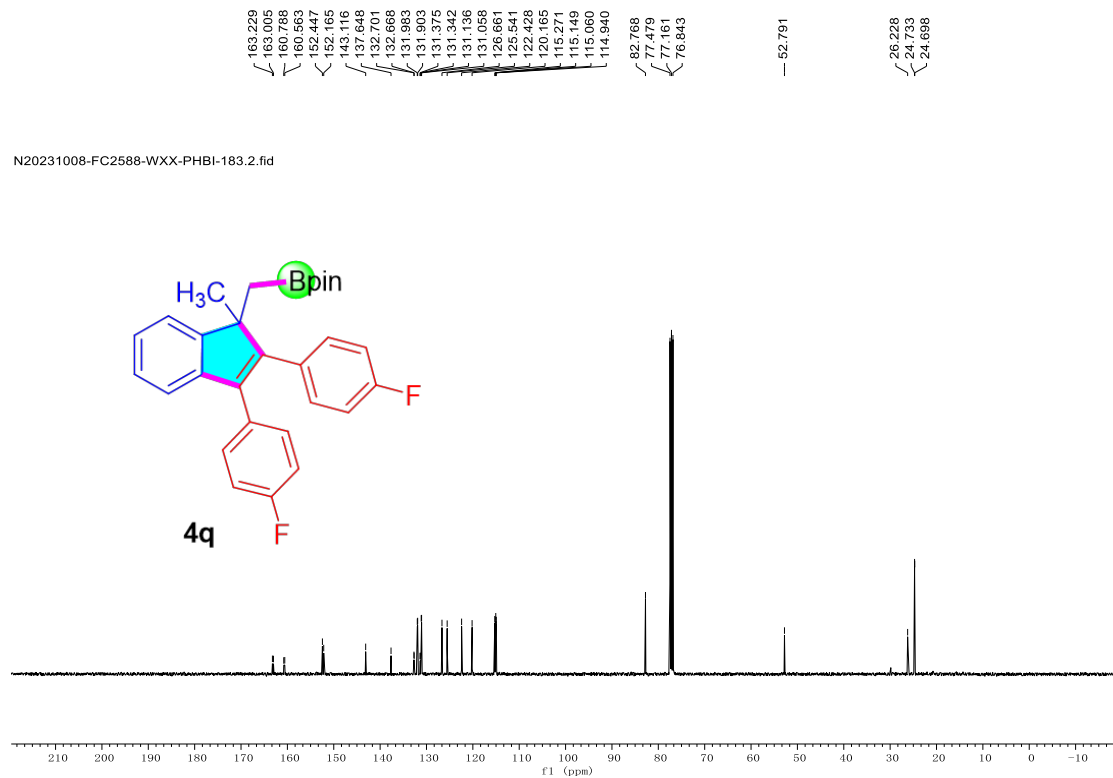



$^{19}\text{F}$  NMR (376 MHz,  $\text{CDCl}_3$ ) Spectrum of **4q**

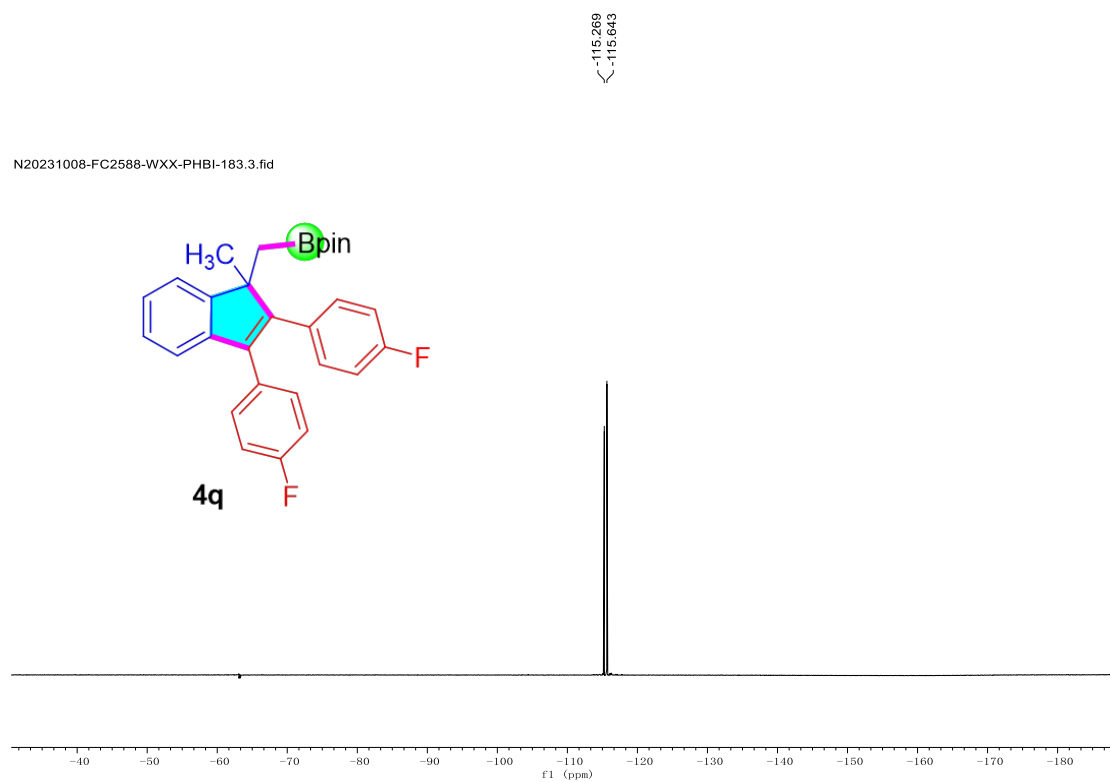

<sup>1</sup>H NMR (400 MHz, CDCl<sub>3</sub>) Spectrum of **4r**

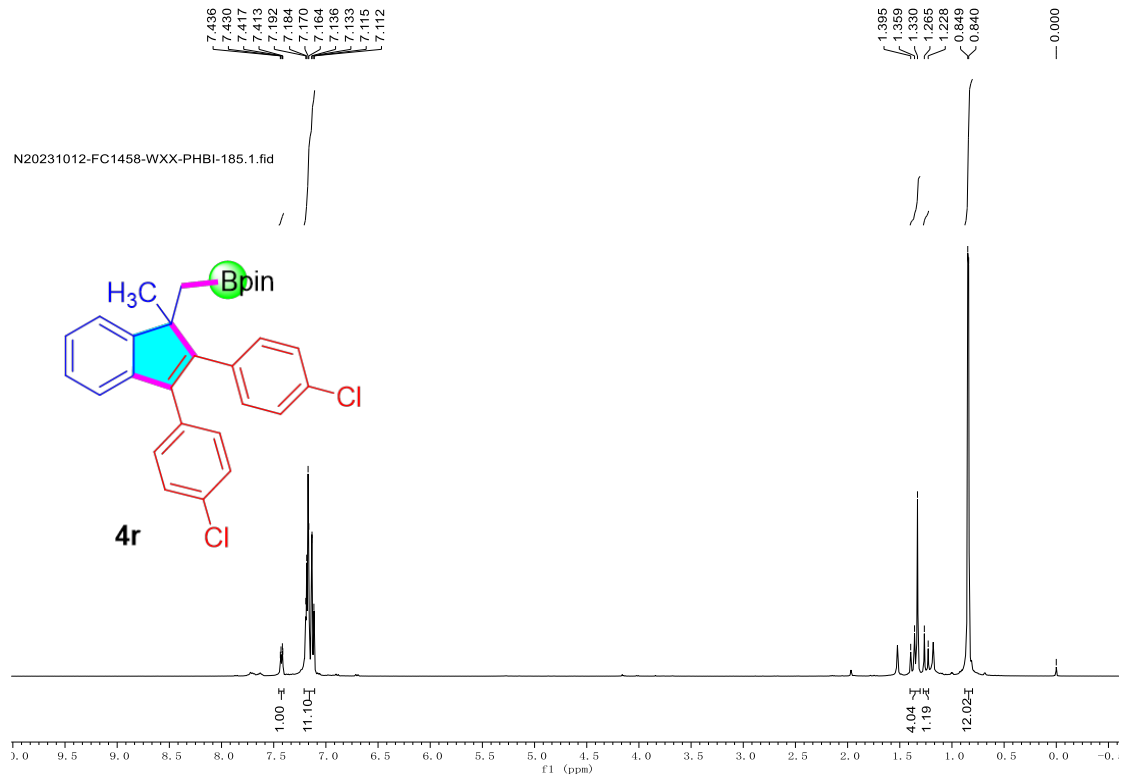

<sup>13</sup>C{<sup>1</sup>H} NMR (101 MHz, CDCl<sub>3</sub>) Spectrum of **4r**

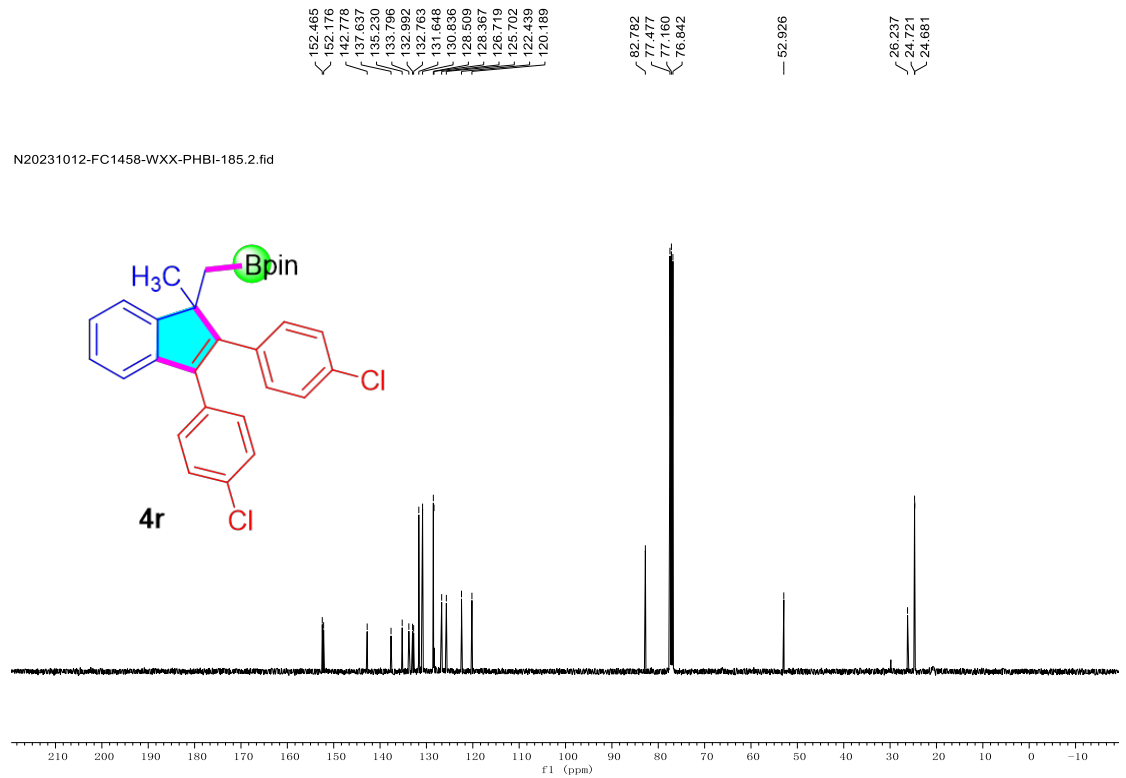

<sup>1</sup>H NMR (400 MHz, CDCl<sub>3</sub>) Spectrum of **4s**

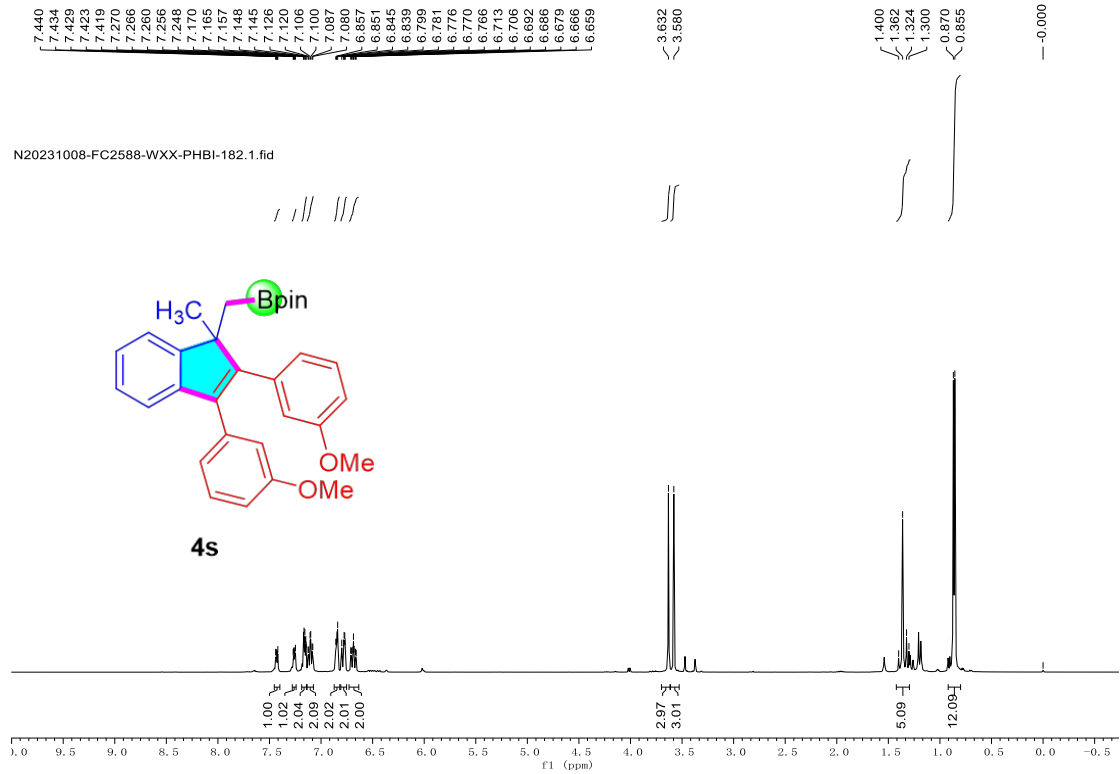

<sup>13</sup>C{<sup>1</sup>H} NMR (101 MHz, CDCl<sub>3</sub>) Spectrum of **4s**

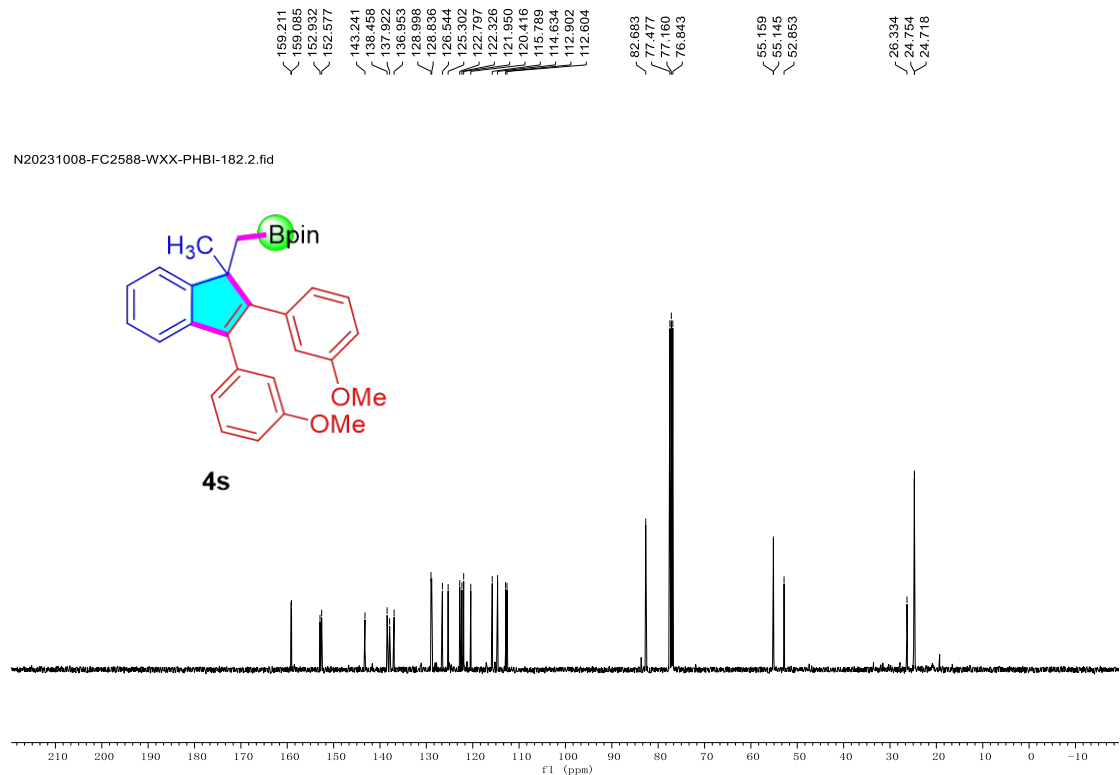

<sup>1</sup>H NMR (400 MHz, CDCl<sub>3</sub>) Spectrum of **4t**

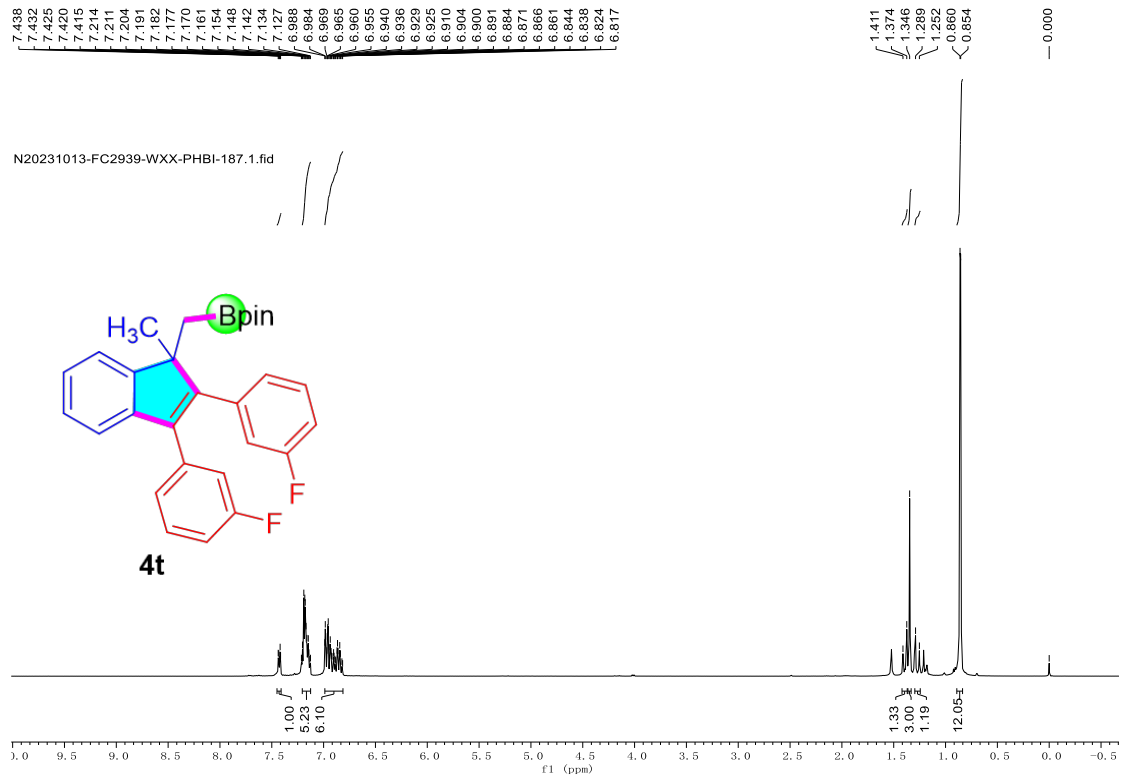

<sup>13</sup>C{<sup>1</sup>H} NMR (101 MHz, CDCl<sub>3</sub>) Spectrum of **4t**

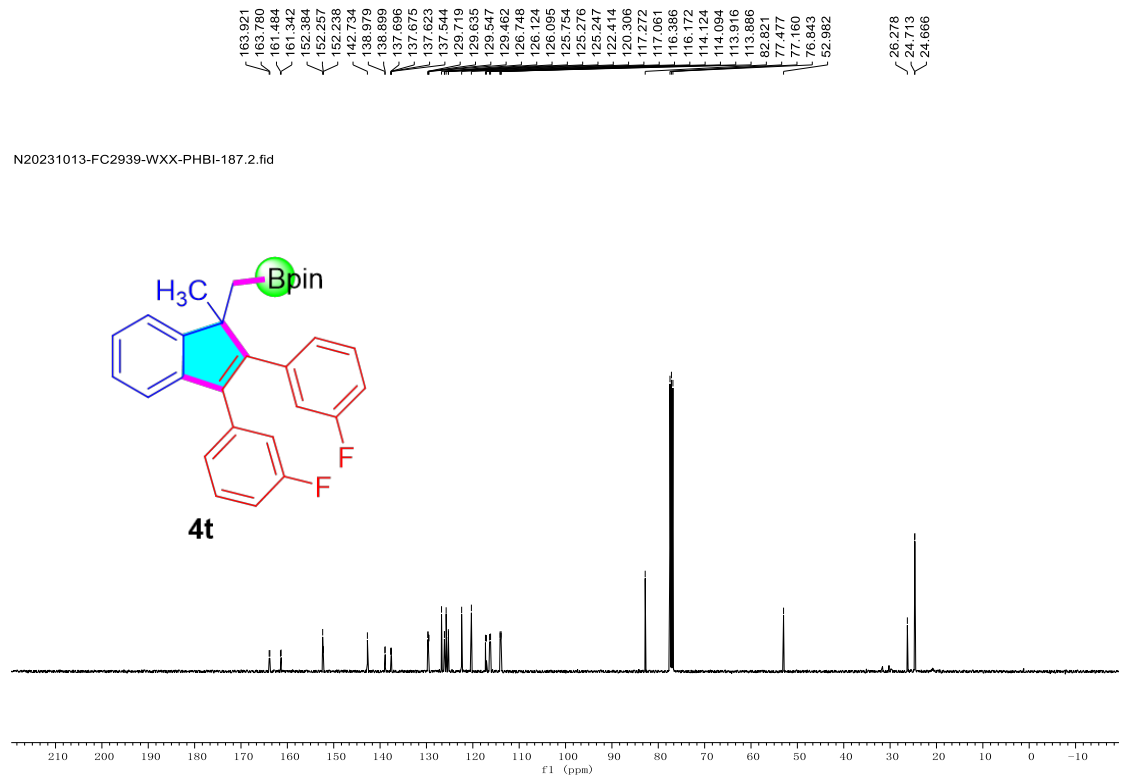

$^{19}\text{F}$  NMR (376 MHz,  $\text{CDCl}_3$ ) Spectrum of **4t**

113.608  
113.624

N20231014-FC2105-WXX-187-F.1.fid

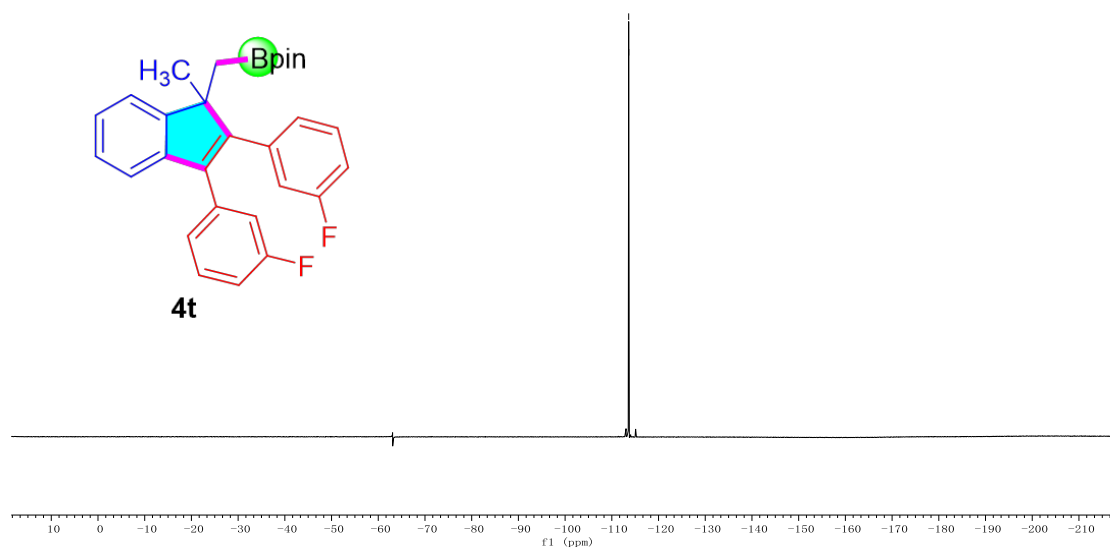

### $^1\text{H}$ NMR (400 MHz, $\text{CDCl}_3$ ) Spectrum of **4u**

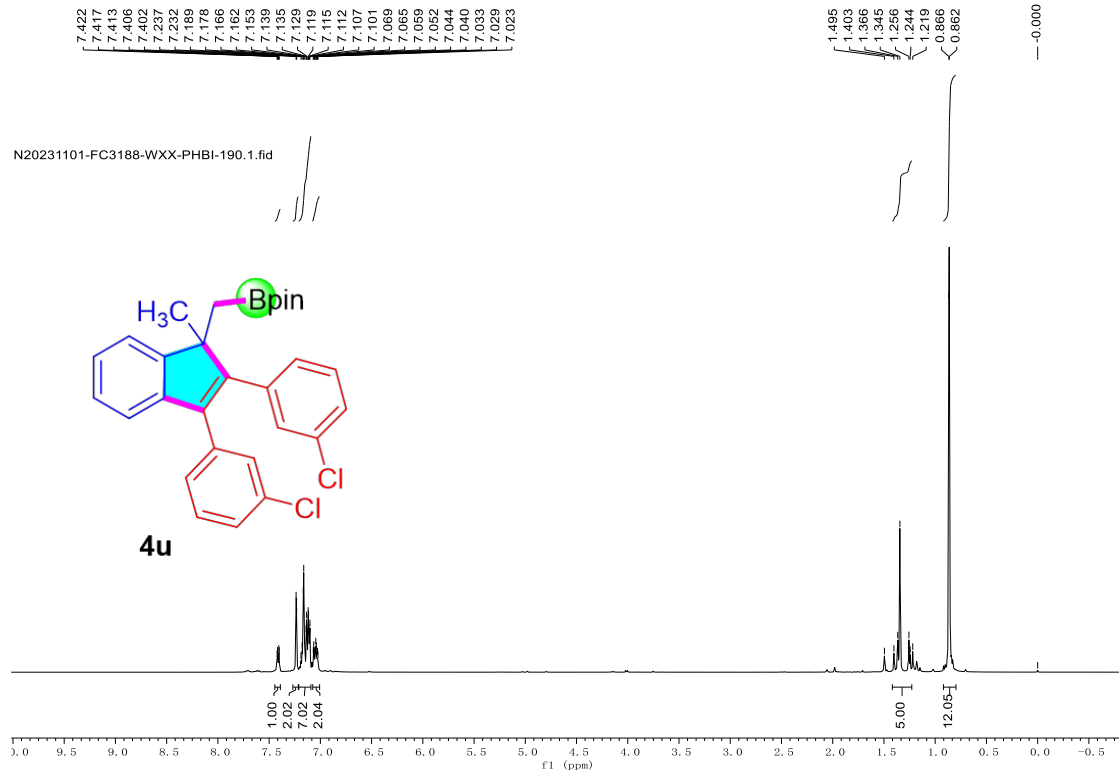

### $^{13}\text{C}\{^1\text{H}\}$ NMR (101 MHz, $\text{CDCl}_3$ ) Spectrum of **4u**

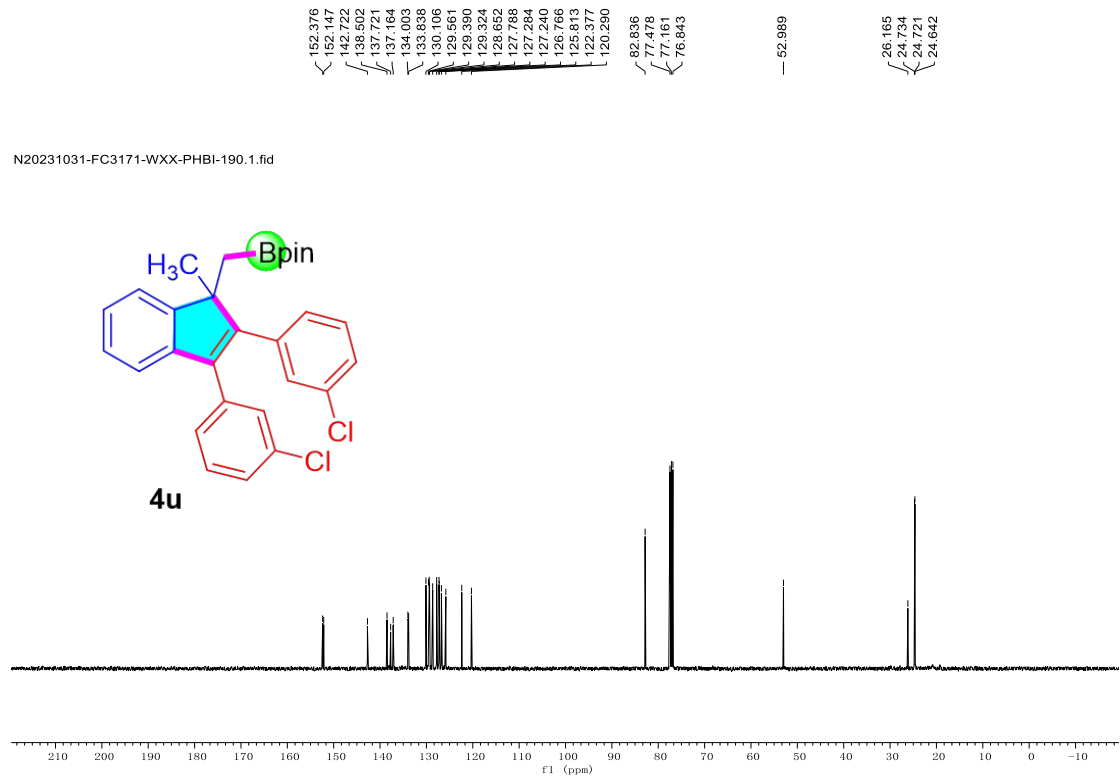

<sup>1</sup>H NMR (400 MHz, CDCl<sub>3</sub>) Spectrum of **4v**

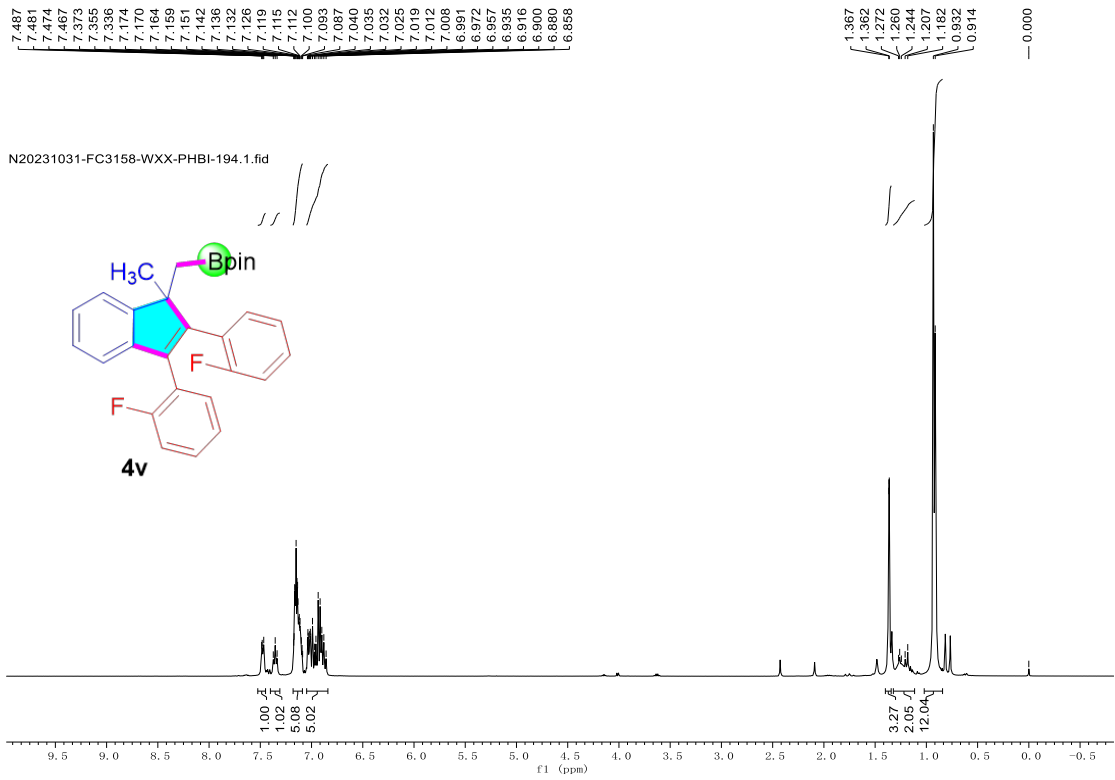

<sup>13</sup>C{<sup>1</sup>H} NMR (101 MHz, CDCl<sub>3</sub>) Spectrum of **4v**

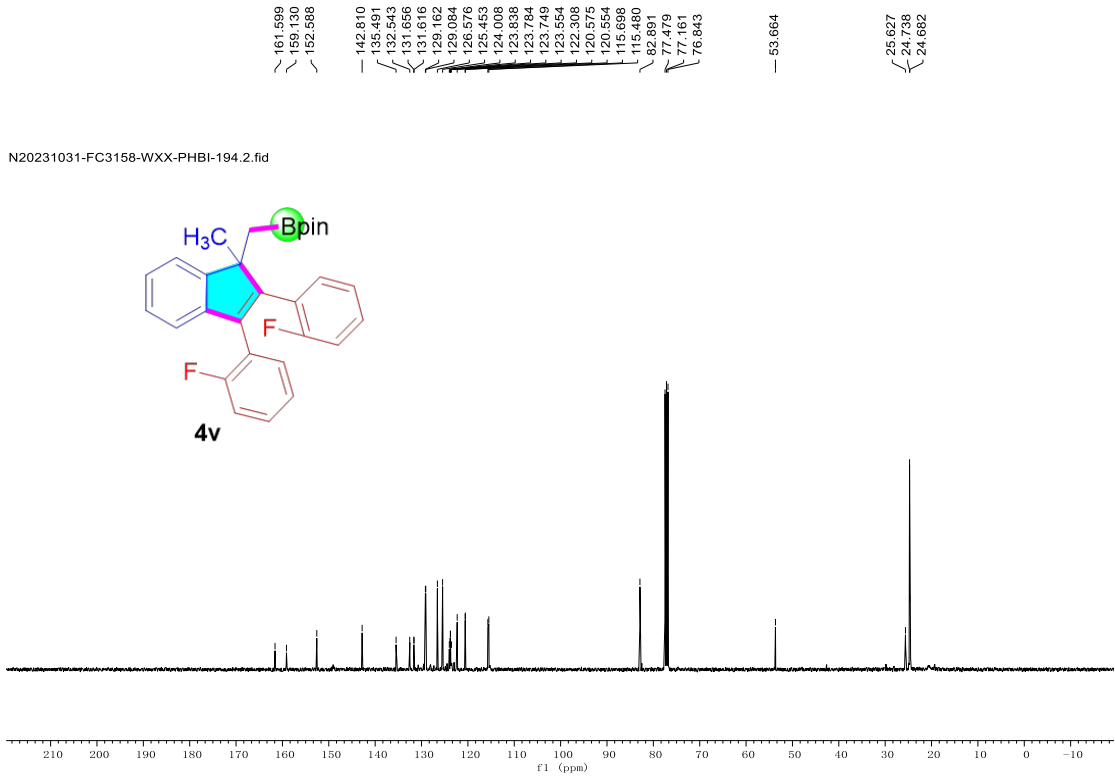

$^{19}\text{F}$  NMR (376 MHz,  $\text{CDCl}_3$ ) Spectrum of **4v**

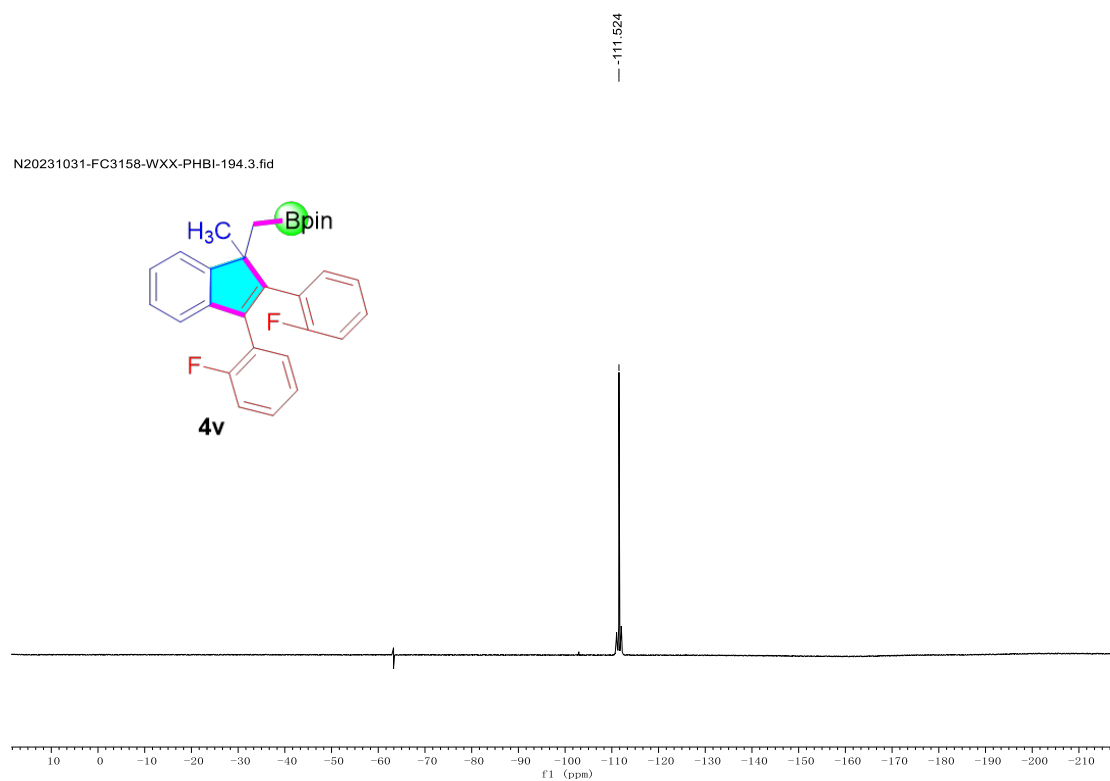



# $^1\text{H}$ NMR (400 MHz, $\text{CDCl}_3$ ) Spectrum of **4w**

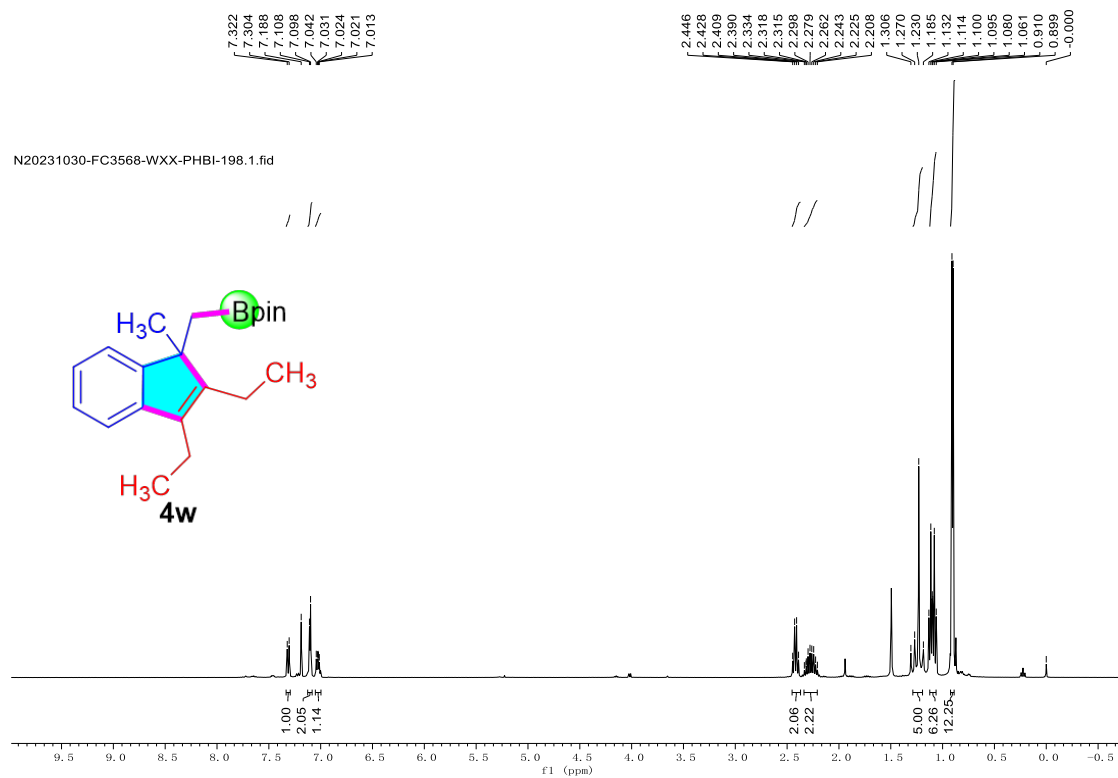

# $^{13}\text{C}\{^1\text{H}\}$ NMR (101 MHz, $\text{CDCl}_3$ ) Spectrum of **4w**

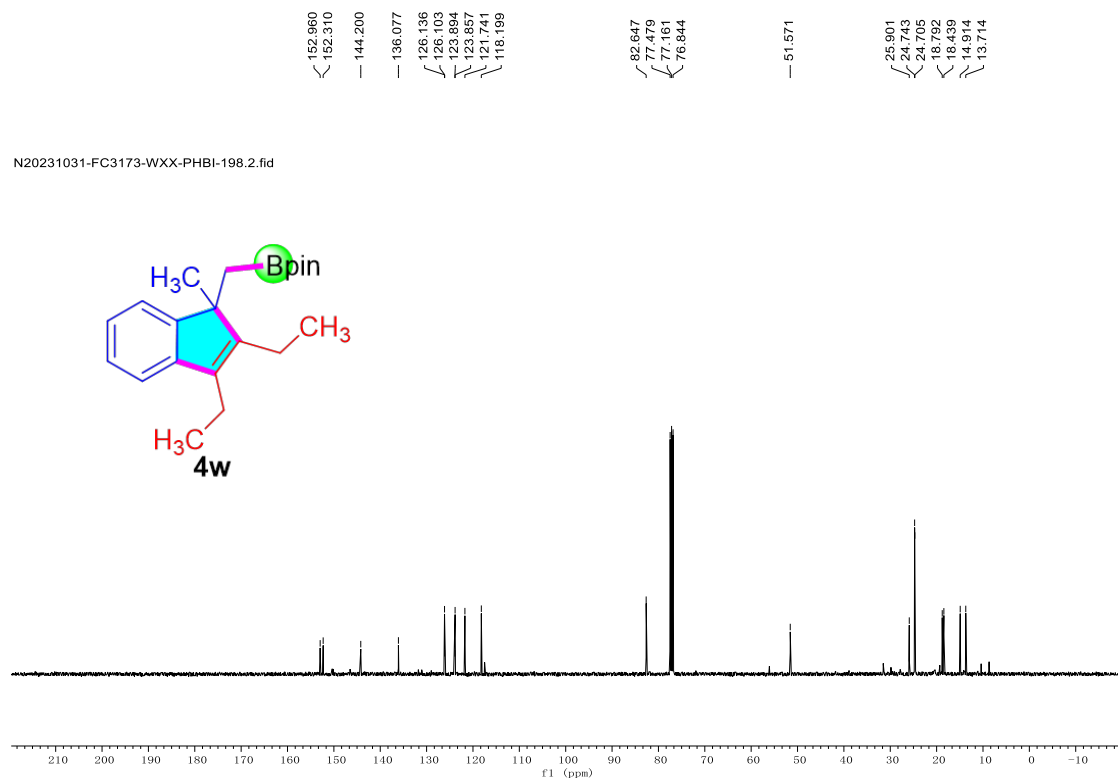

# <sup>1</sup>H NMR (400 MHz, CDCl<sub>3</sub>) Spectrum of **4x**

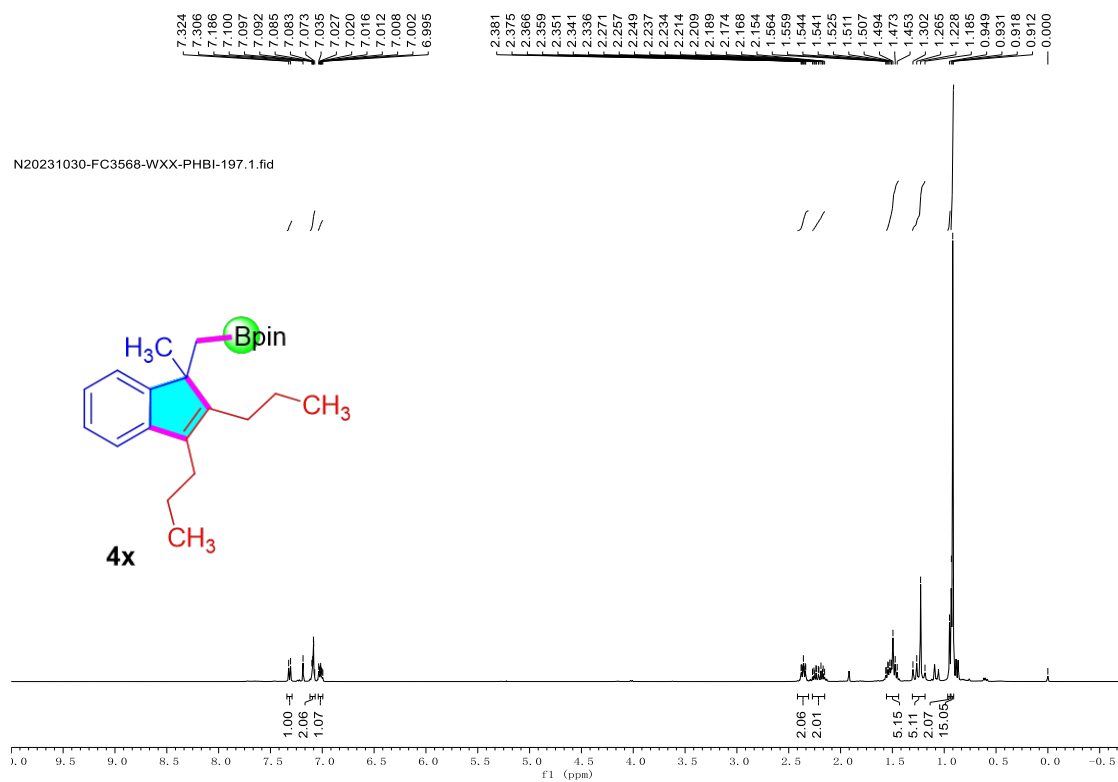

# <sup>13</sup>C{<sup>1</sup>H} NMR (101 MHz, CDCl<sub>3</sub>) Spectrum of **4x**

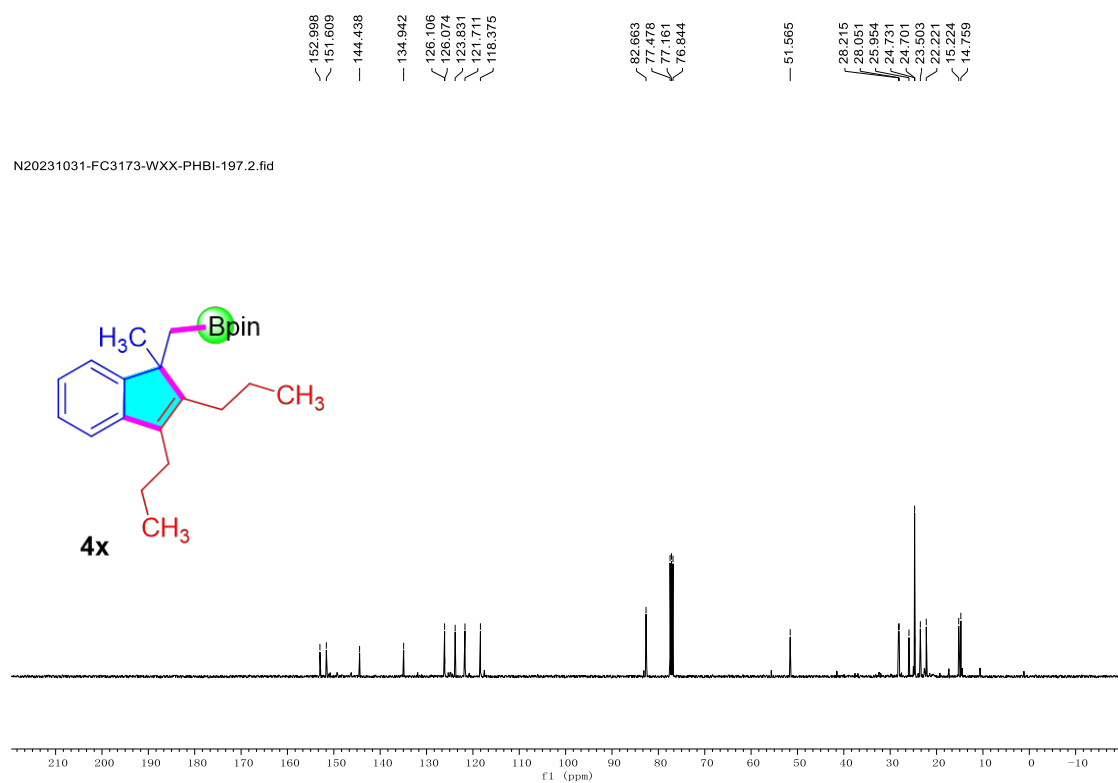

# <sup>1</sup>H NMR (400 MHz, CDCl<sub>3</sub>) Spectrum of 4y

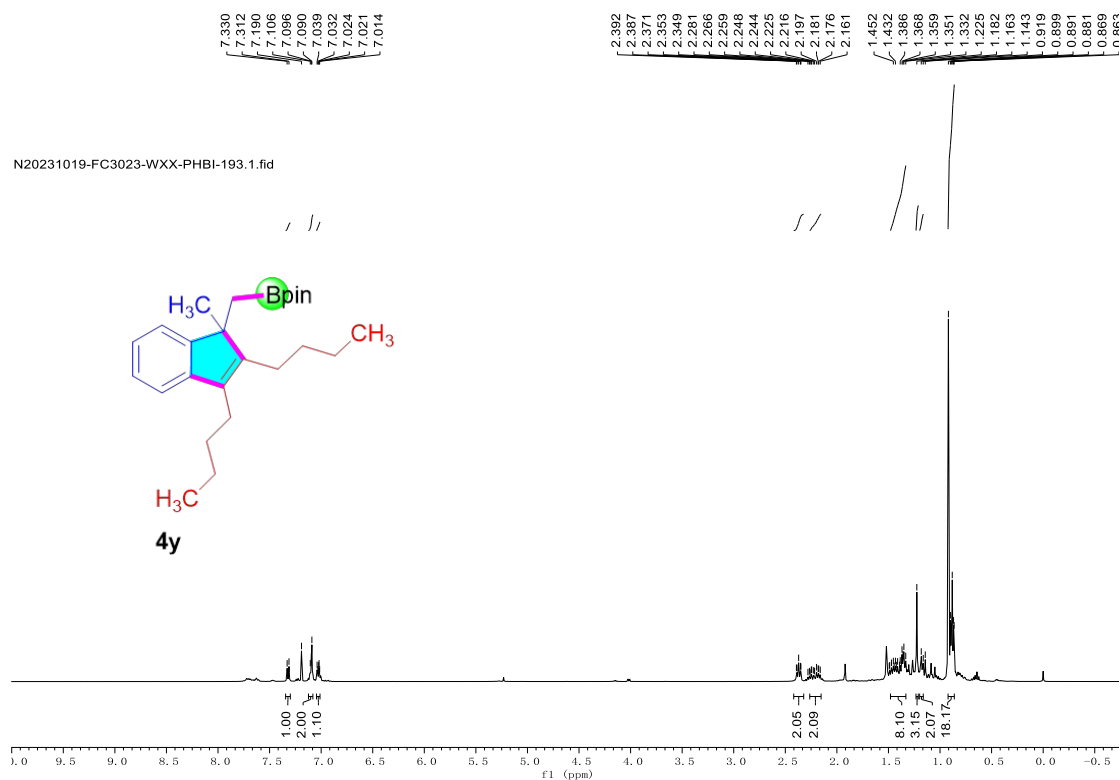

# <sup>13</sup>C{<sup>1</sup>H} NMR (101 MHz, CDCl<sub>3</sub>) Spectrum of 4y

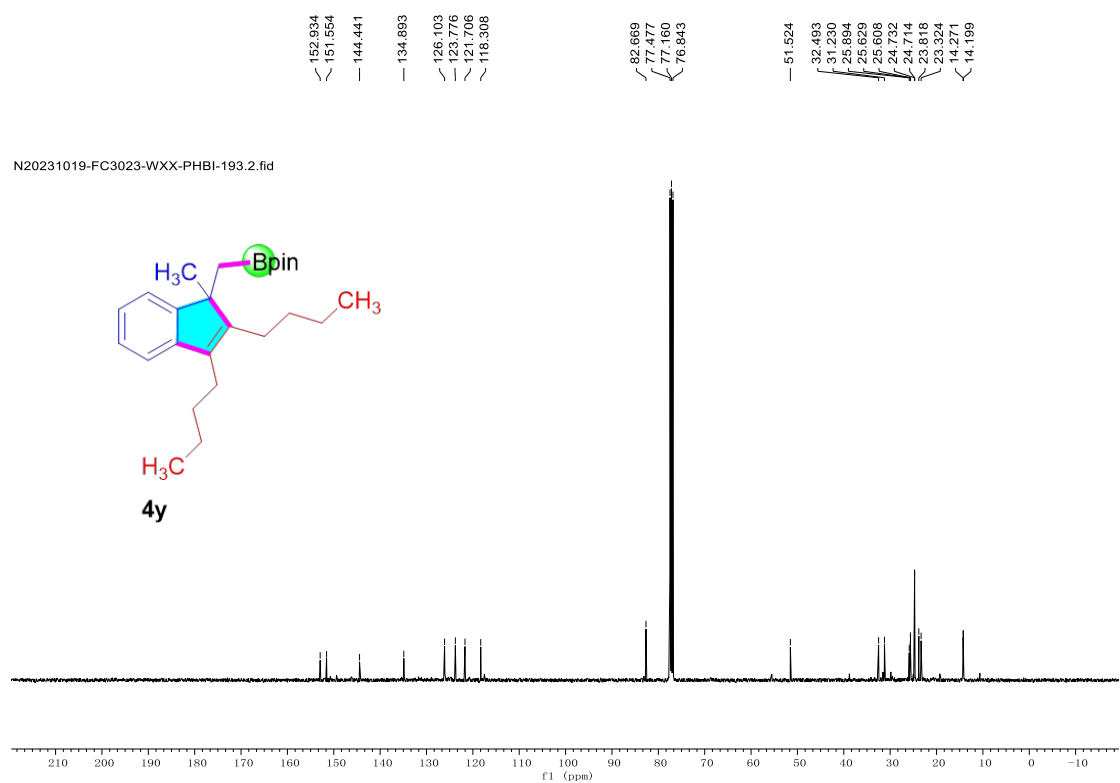

### <sup>1</sup>H NMR (400 MHz, CDCl<sub>3</sub>) Spectrum of **4z**

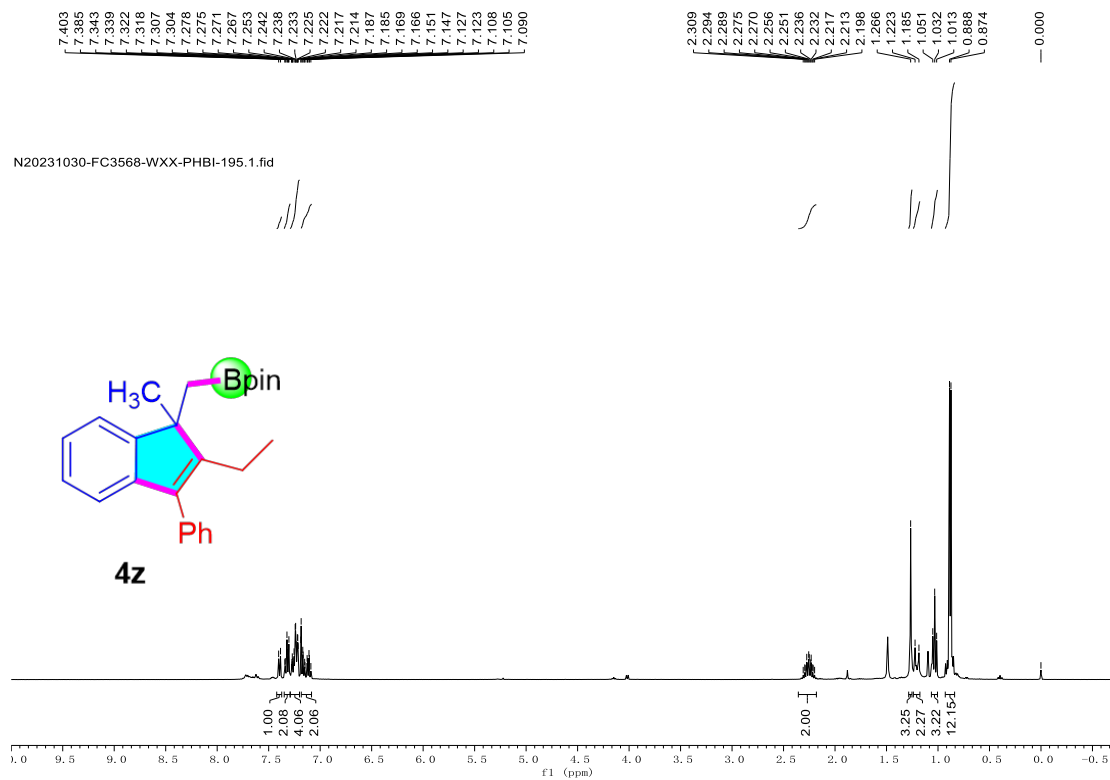

### <sup>13</sup>C{<sup>1</sup>H} NMR (101 MHz, CDCl<sub>3</sub>) Spectrum of **4z**

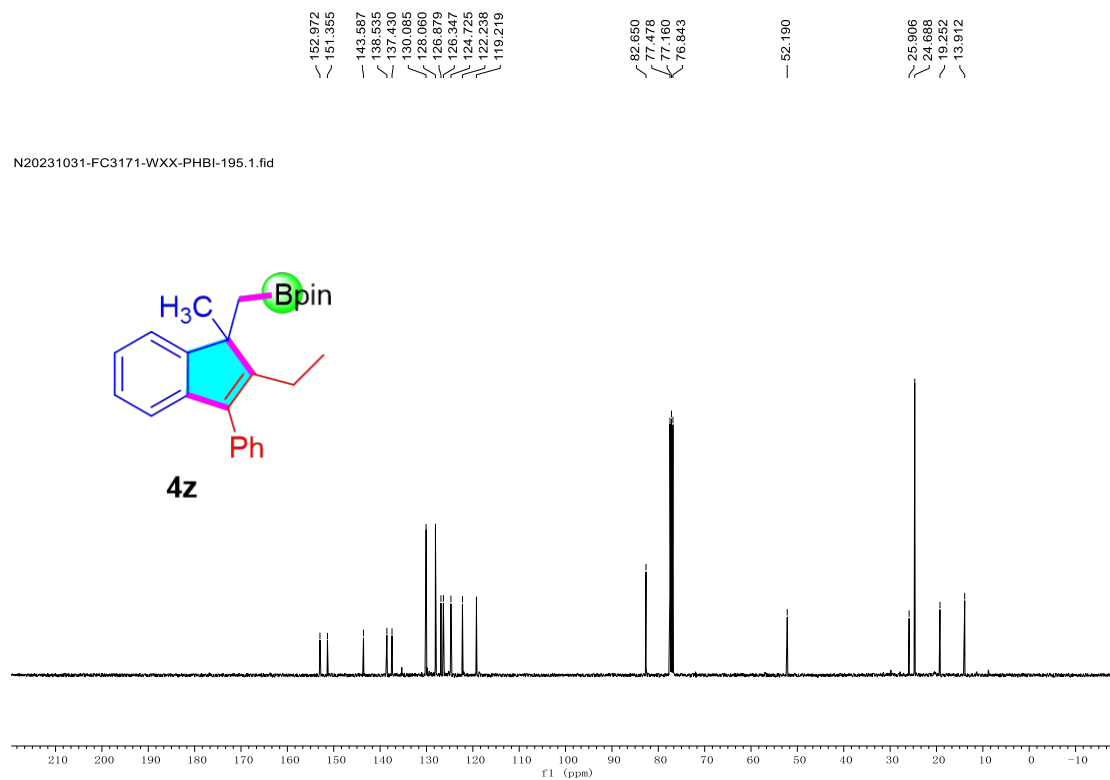

<sup>1</sup>H NMR (400 MHz, CDCl<sub>3</sub>) Spectrum of **4aa**

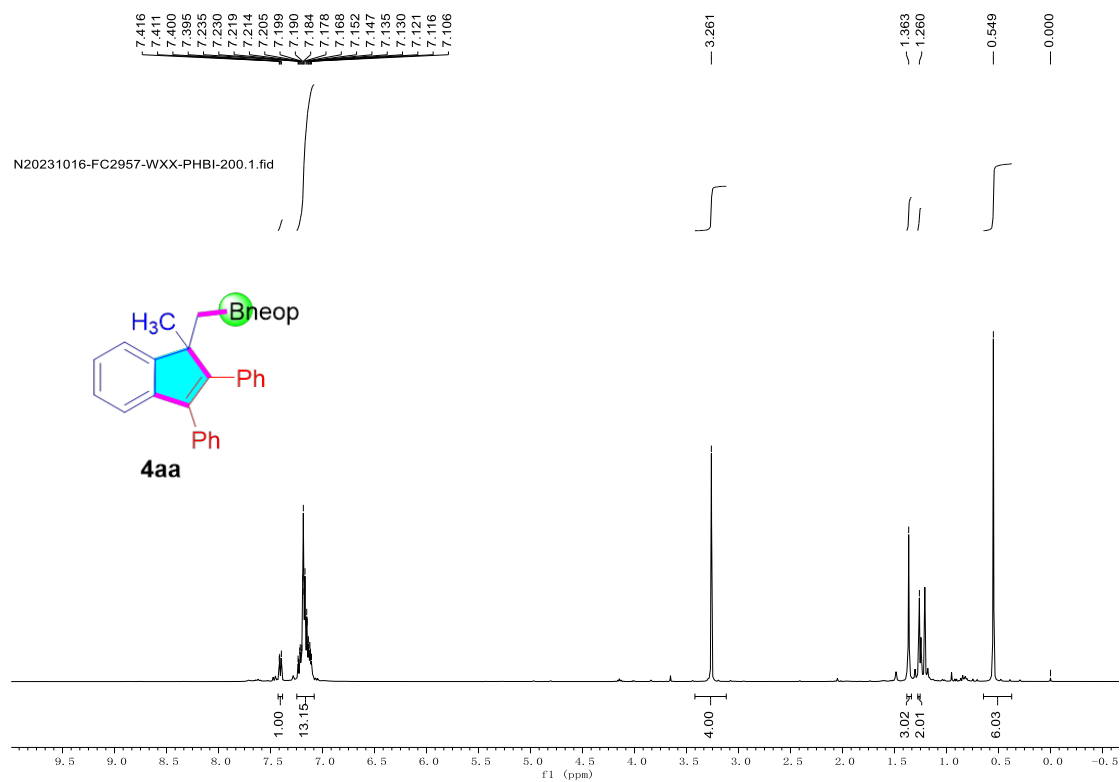

<sup>13</sup>C{<sup>1</sup>H} NMR (101 MHz, CDCl<sub>3</sub>) Spectrum of **4aa**

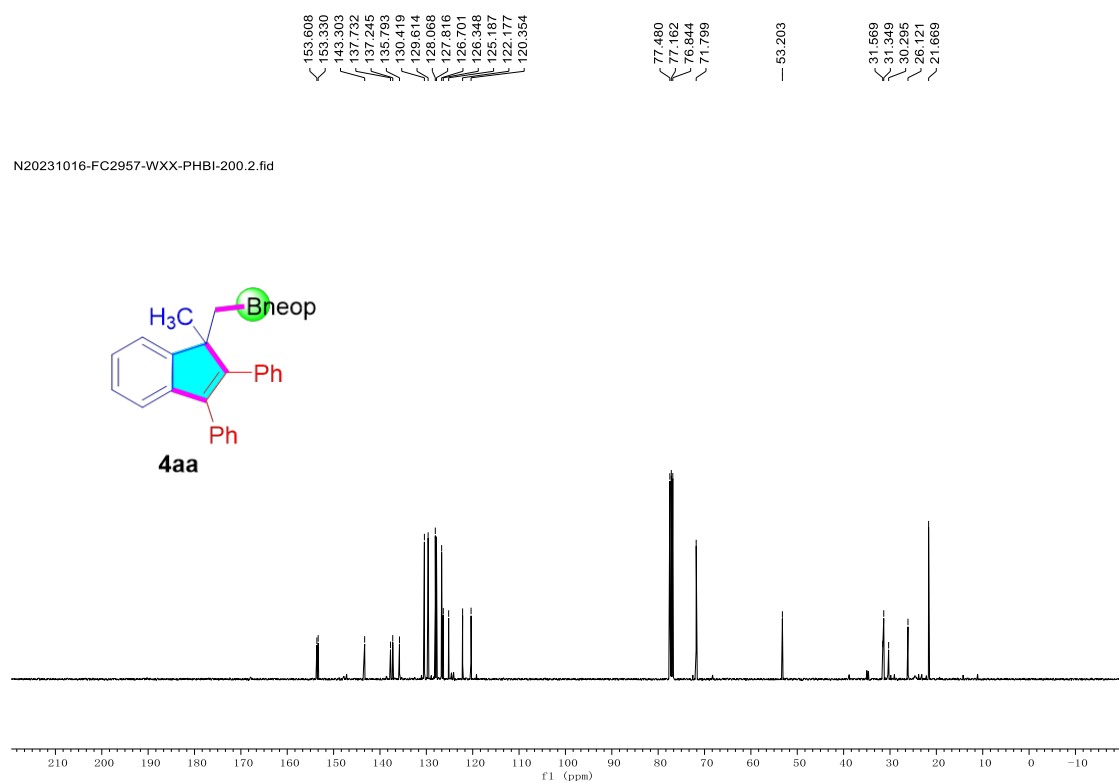

<sup>1</sup>H NMR (400 MHz, CDCl<sub>3</sub>) Spectrum of **4ab**

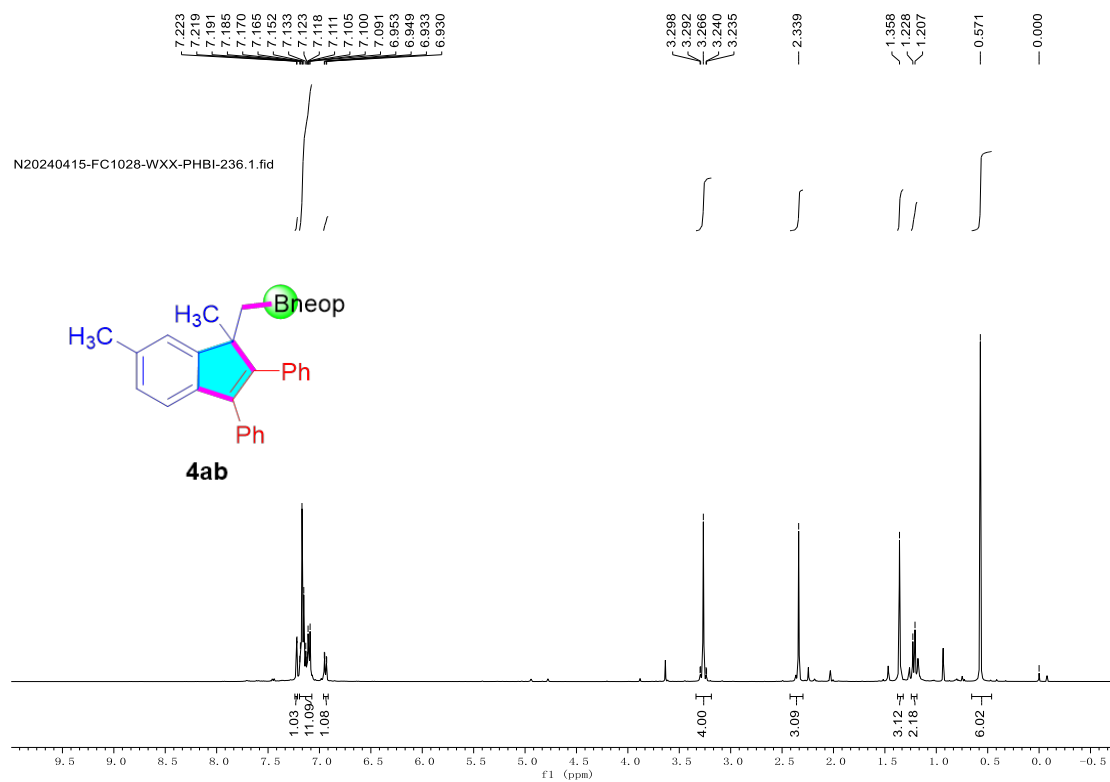

<sup>13</sup>C {<sup>1</sup>H} NMR (101 MHz, CDCl<sub>3</sub>) Spectrum of **4ab**

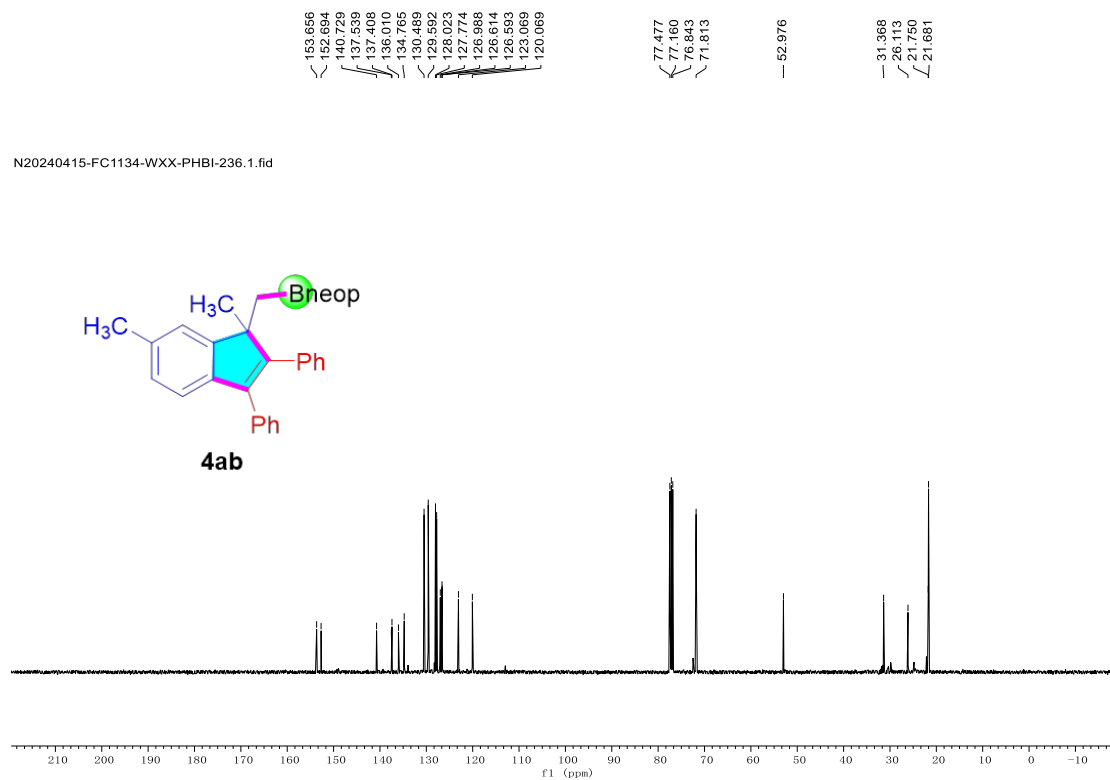

<sup>1</sup>H NMR (400 MHz, CDCl<sub>3</sub>) Spectrum of **4ac**

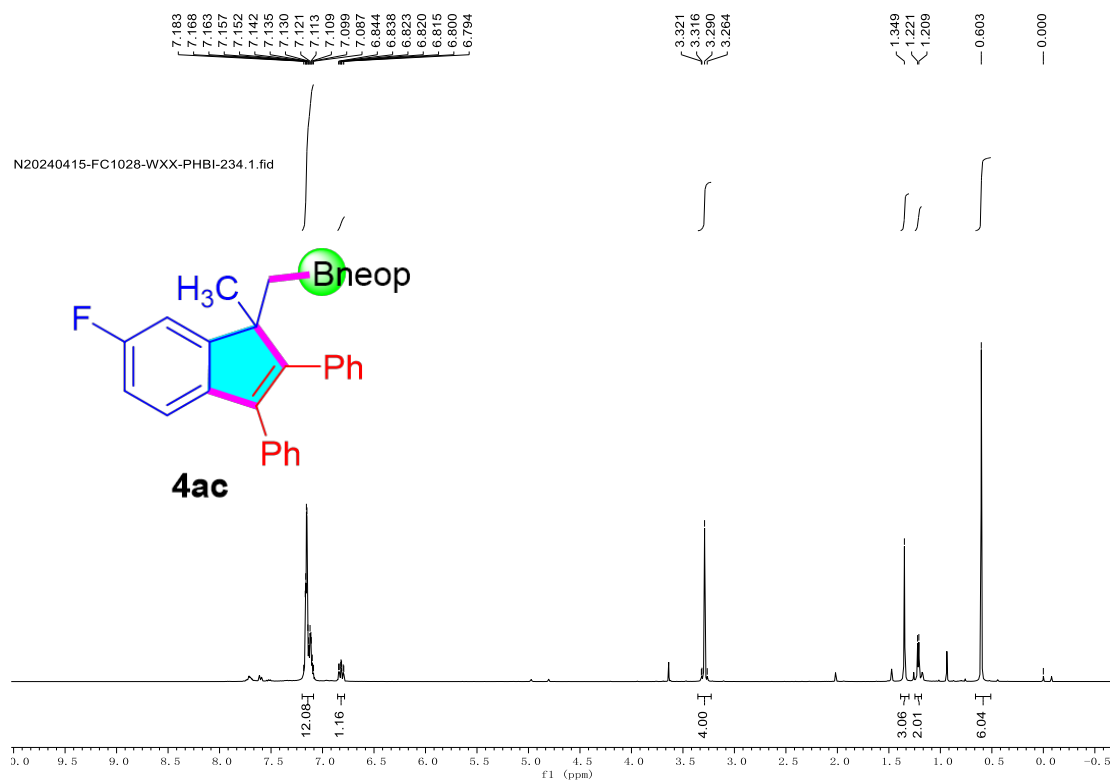

<sup>13</sup>C{<sup>1</sup>H} NMR (101 MHz, CDCl<sub>3</sub>) Spectrum of **4ac**

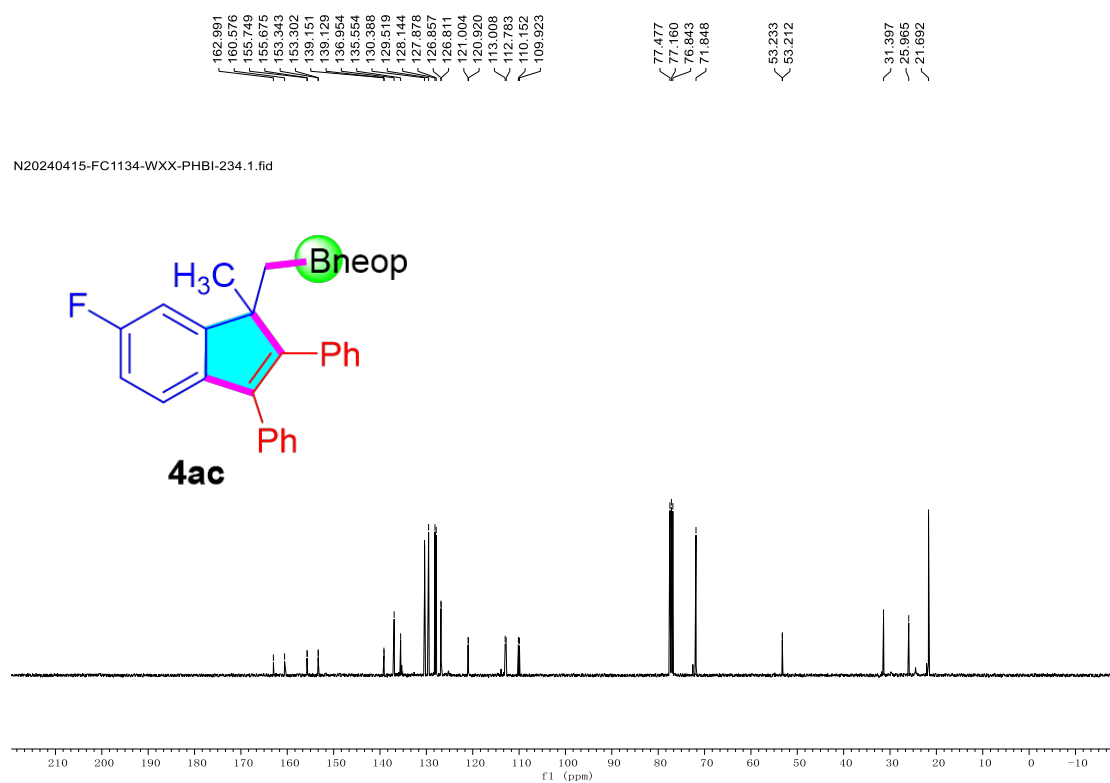

$^{19}\text{F}$  NMR (376 MHz,  $\text{CDCl}_3$ ) Spectrum of **4ac**

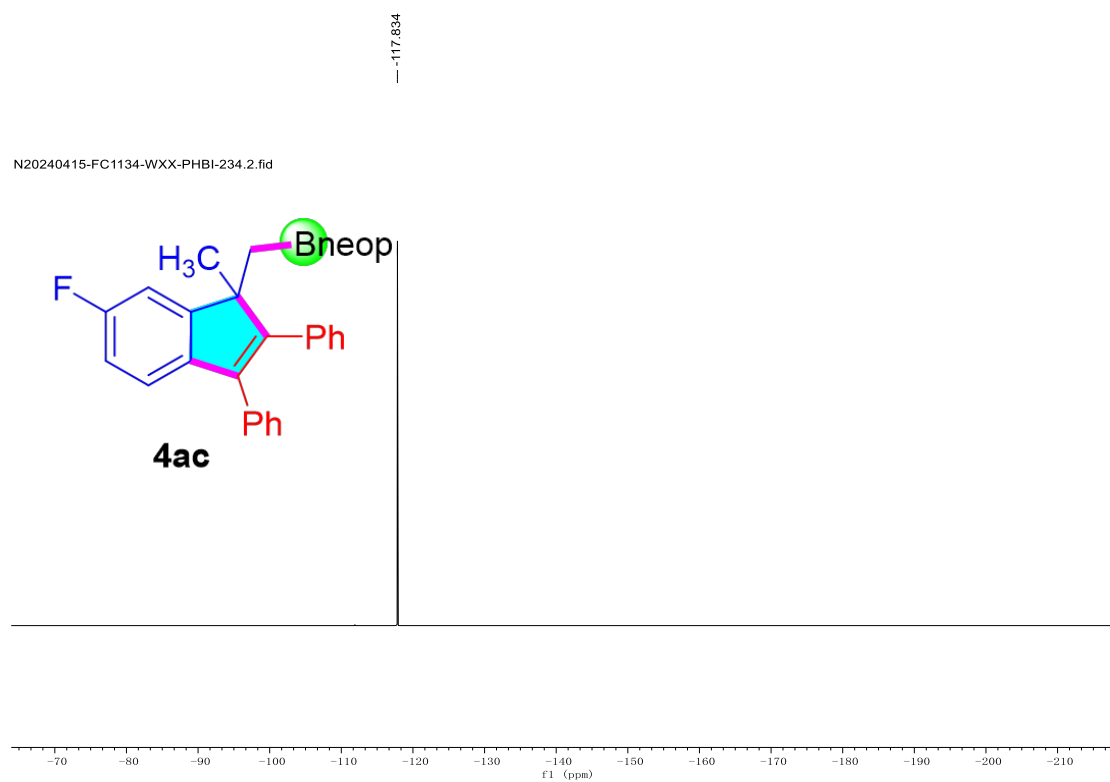



<sup>1</sup>H NMR (400 MHz, CDCl<sub>3</sub>) Spectrum of **4ad**

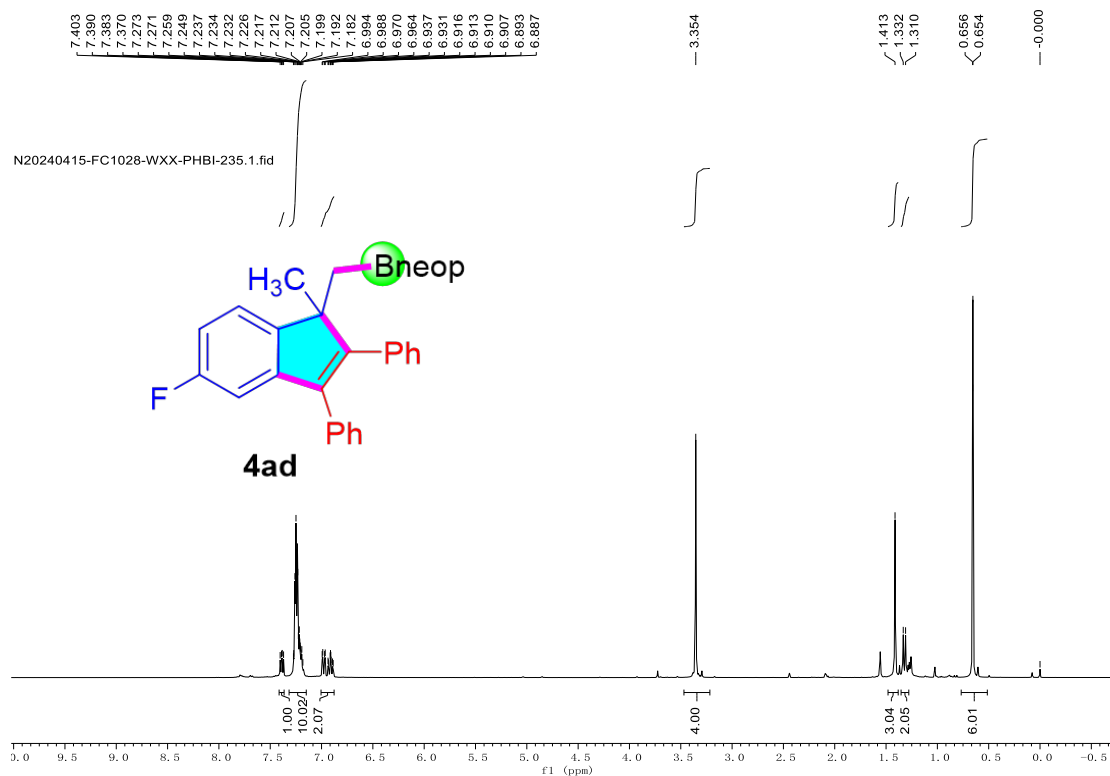

<sup>13</sup>C {<sup>1</sup>H} NMR (101 MHz, CDCl<sub>3</sub>) Spectrum of **4ad**

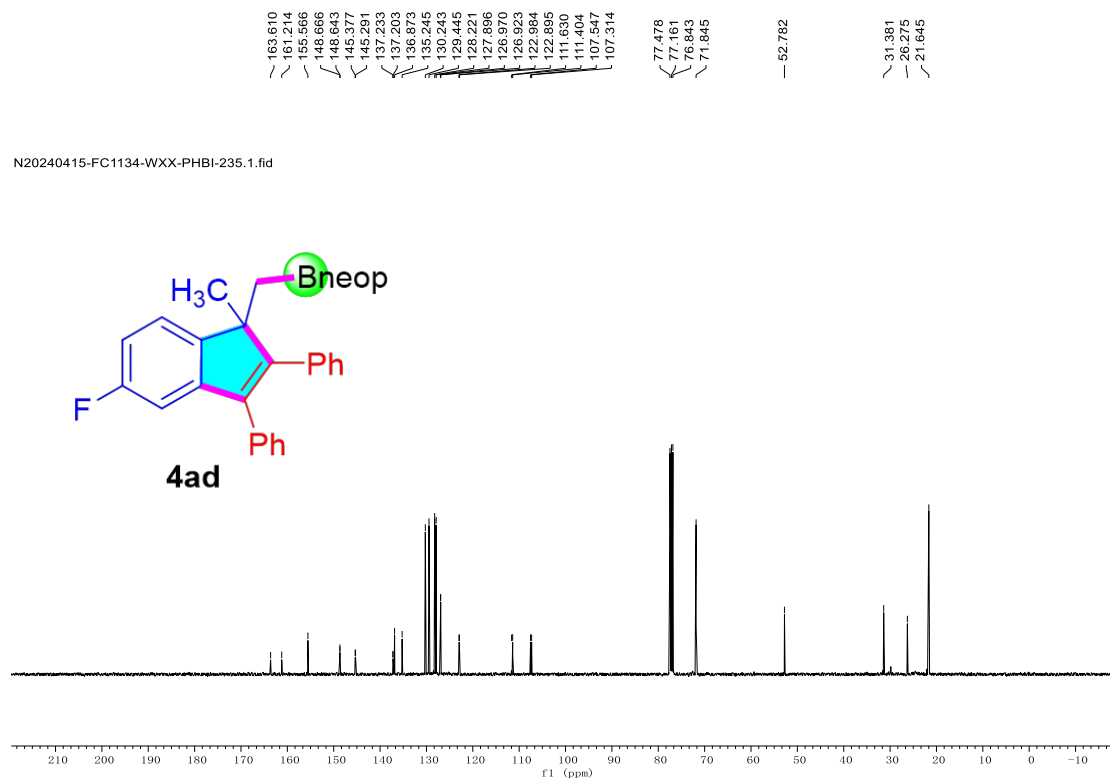

$^{19}\text{F}$  NMR (376 MHz,  $\text{CDCl}_3$ ) Spectrum of **4ad**

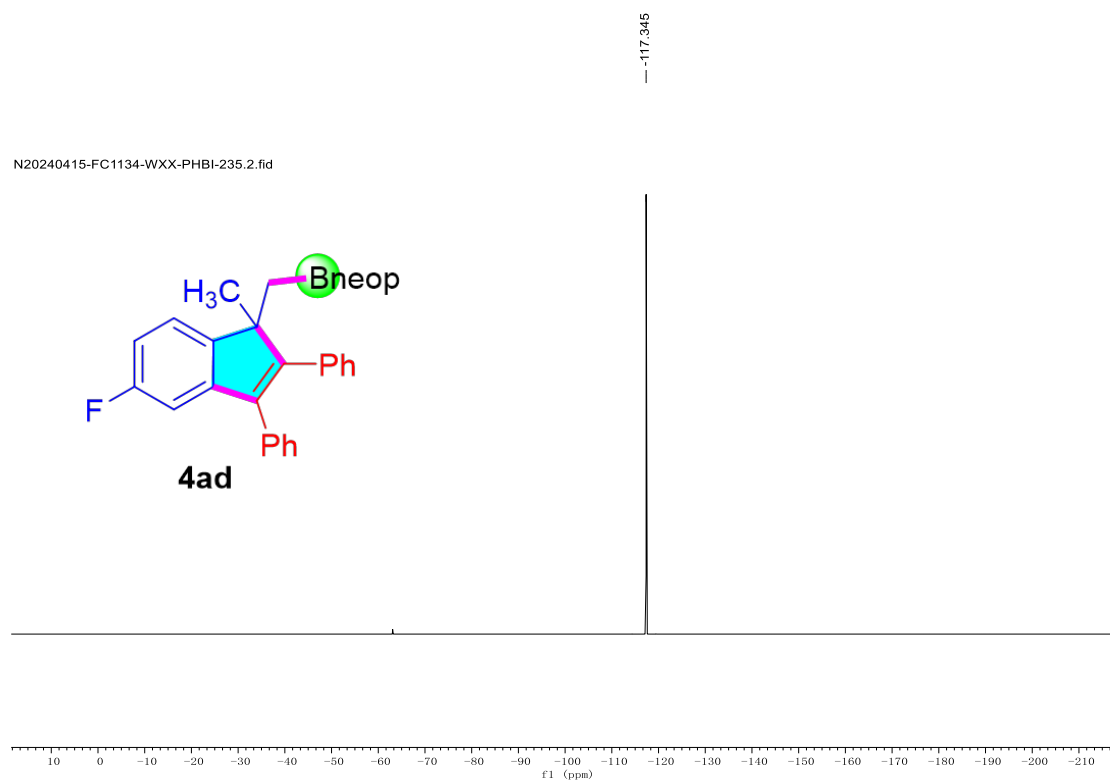

<sup>1</sup>H NMR (400 MHz, CDCl<sub>3</sub>) Spectrum of **4ae**

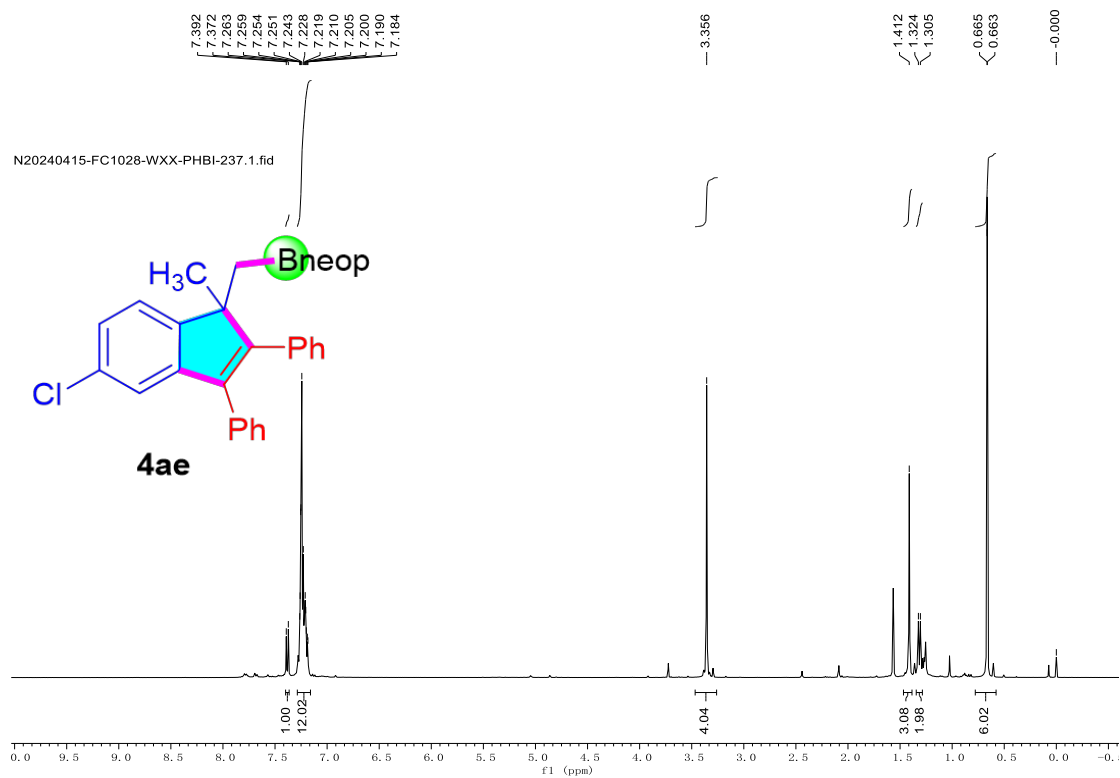

<sup>13</sup>C{<sup>1</sup>H} NMR (101 MHz, CDCl<sub>3</sub>) Spectrum of **4ae**

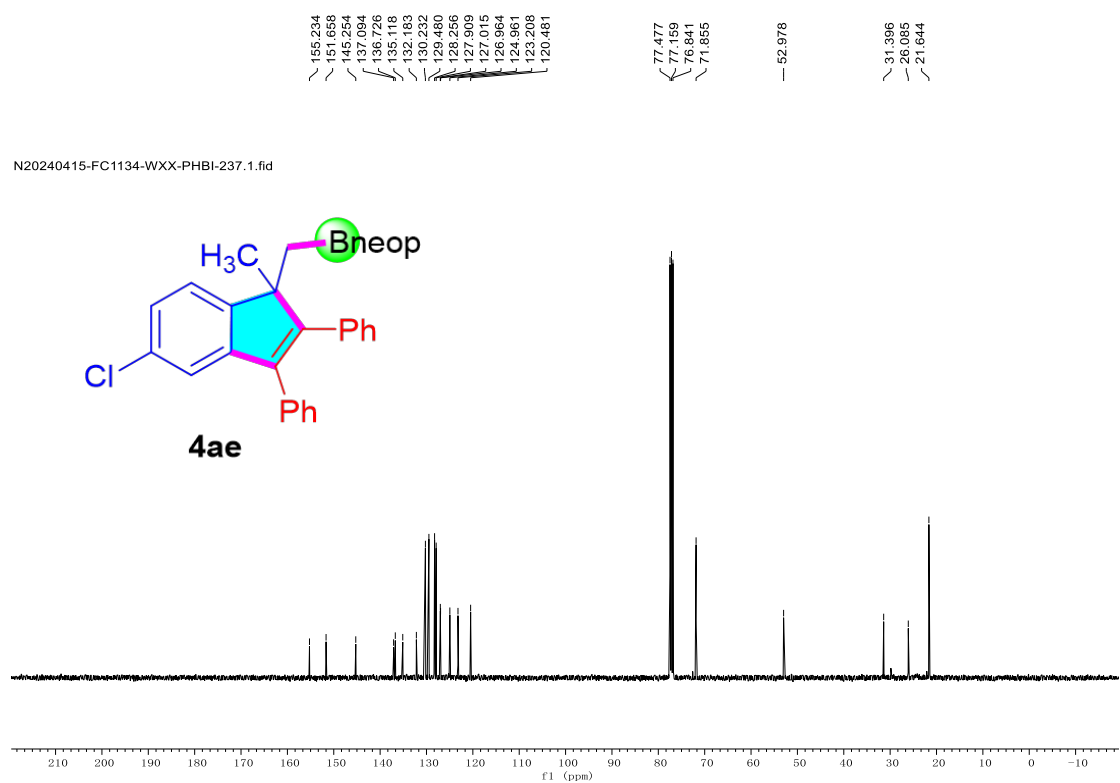

### $^1\text{H}$ NMR (400 MHz, $\text{CDCl}_3$ ) Spectrum of **4af**

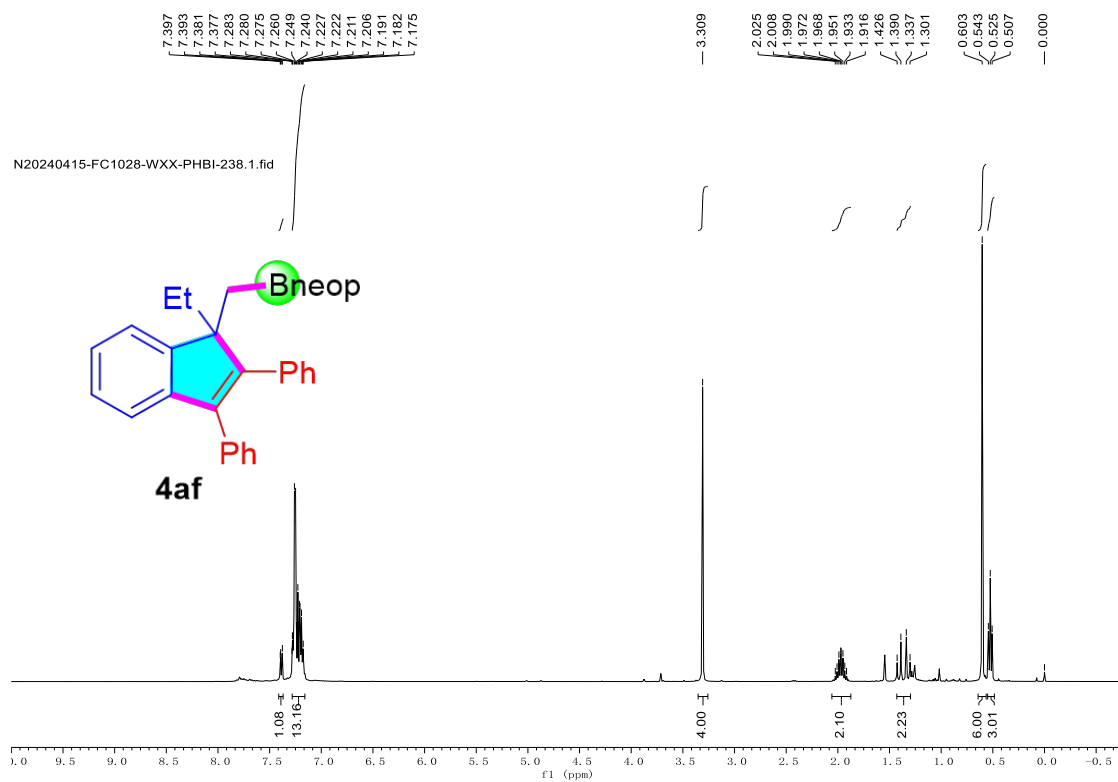

### $^{13}\text{C}\{^1\text{H}\}$ NMR (101 MHz, $\text{CDCl}_3$ ) Spectrum of **4af**

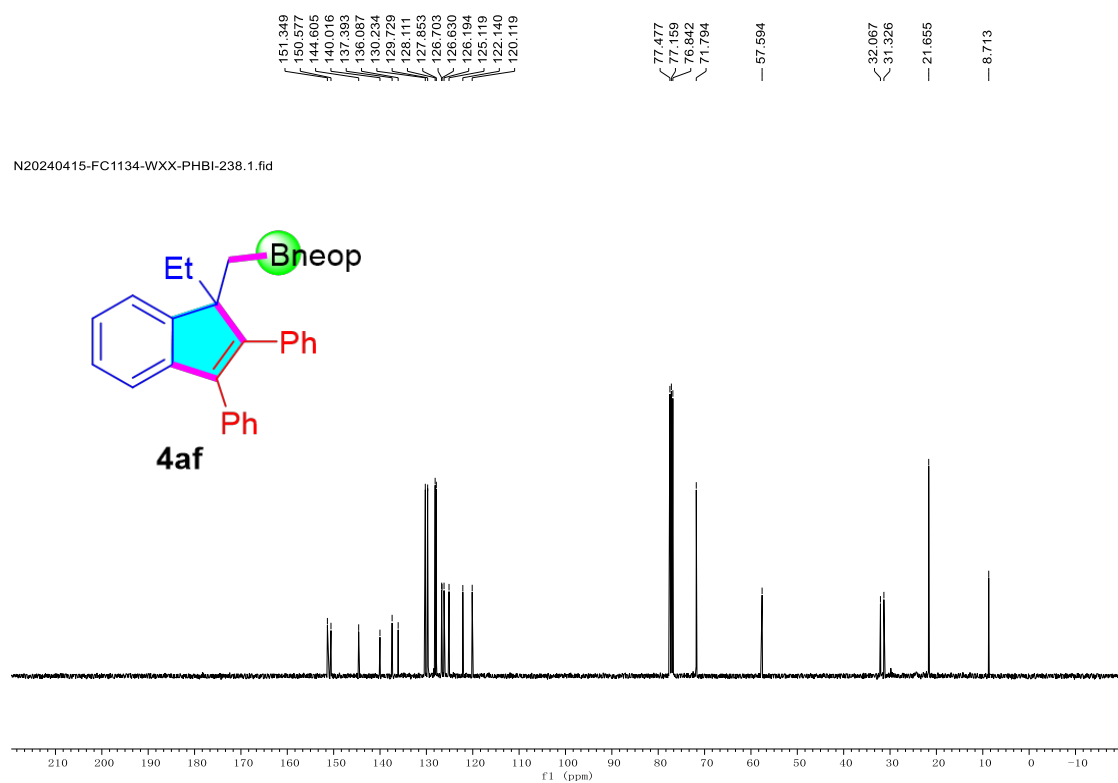

<sup>1</sup>H NMR (400 MHz, CDCl<sub>3</sub>) Spectrum of **4ag**

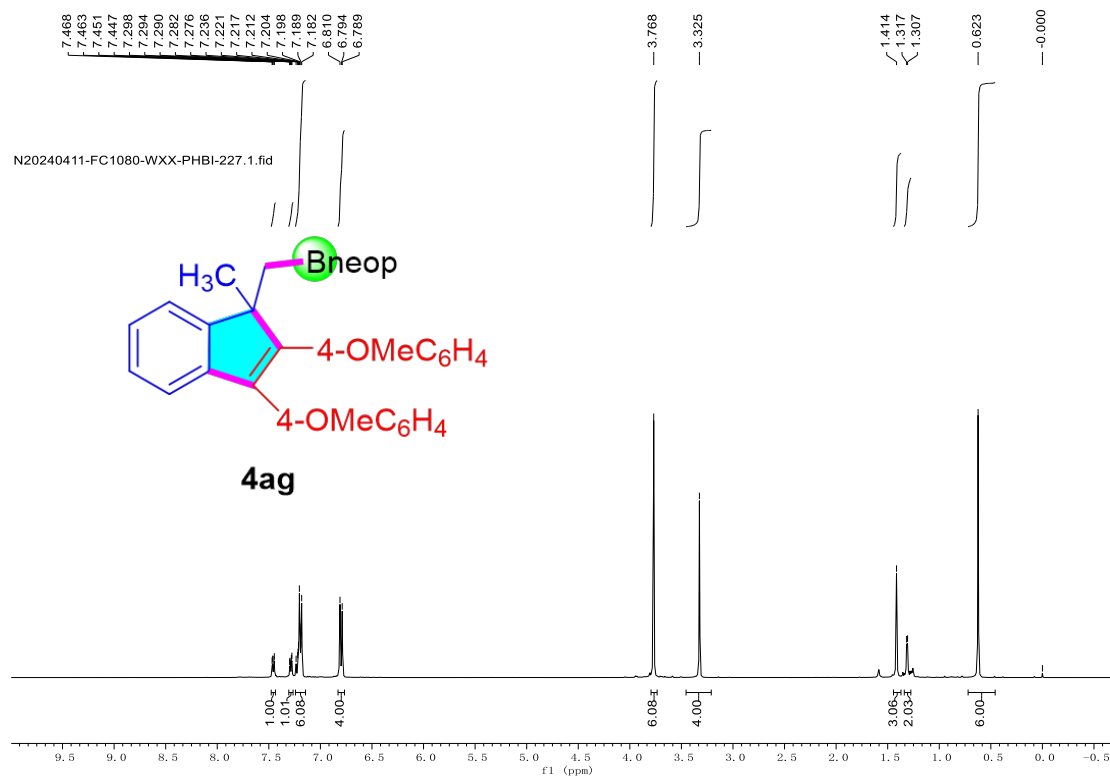

<sup>13</sup>C {<sup>1</sup>H} NMR (101 MHz, CDCl<sub>3</sub>) Spectrum of **4ag**

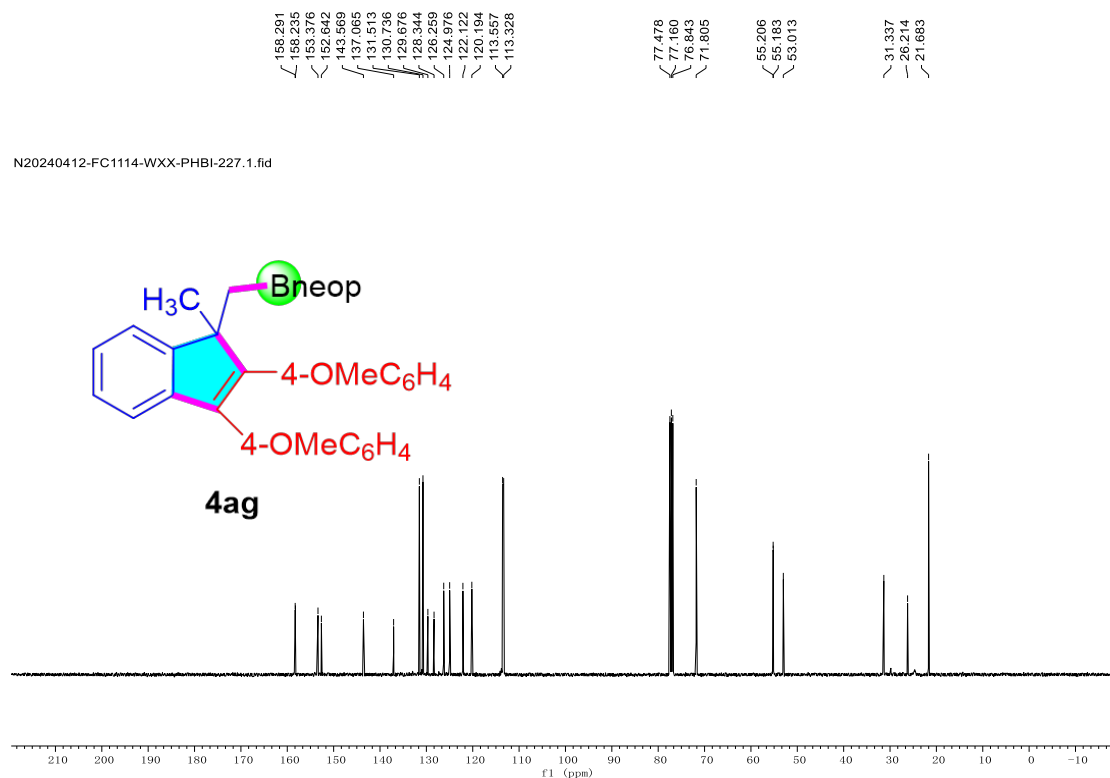

<sup>1</sup>H NMR (400 MHz, CDCl<sub>3</sub>) Spectrum of **4ah**

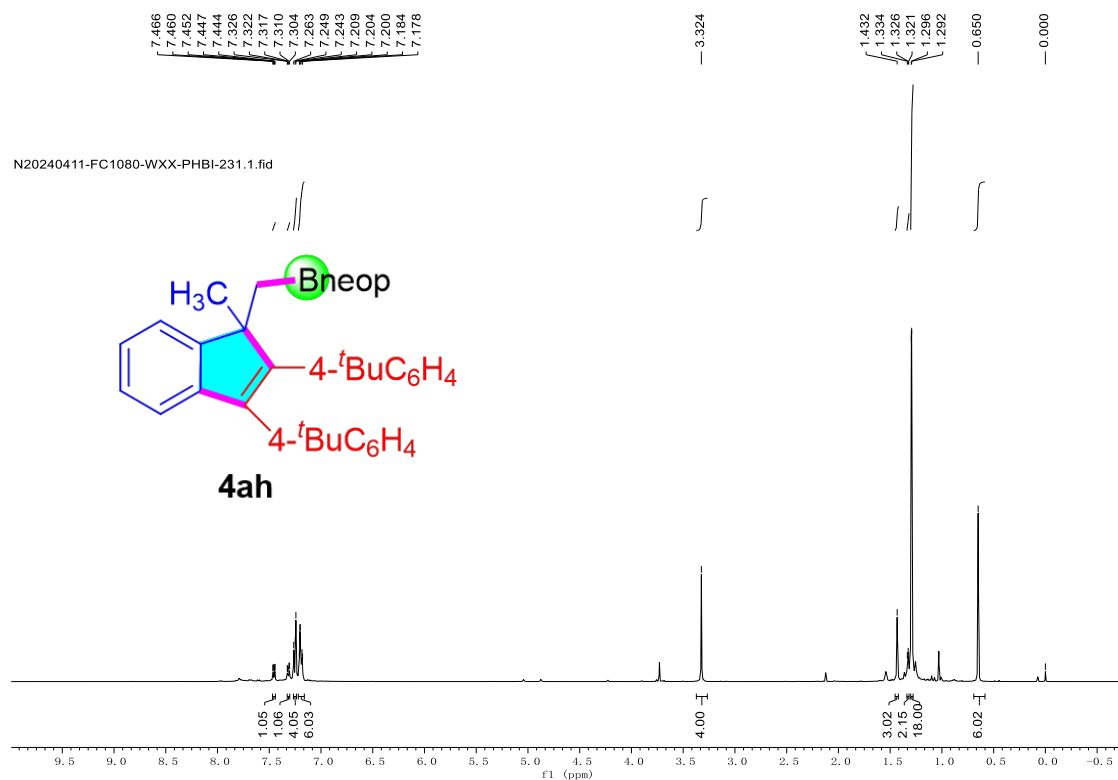

<sup>13</sup>C {<sup>1</sup>H} NMR (101 MHz, CDCl<sub>3</sub>) Spectrum of **4ah**

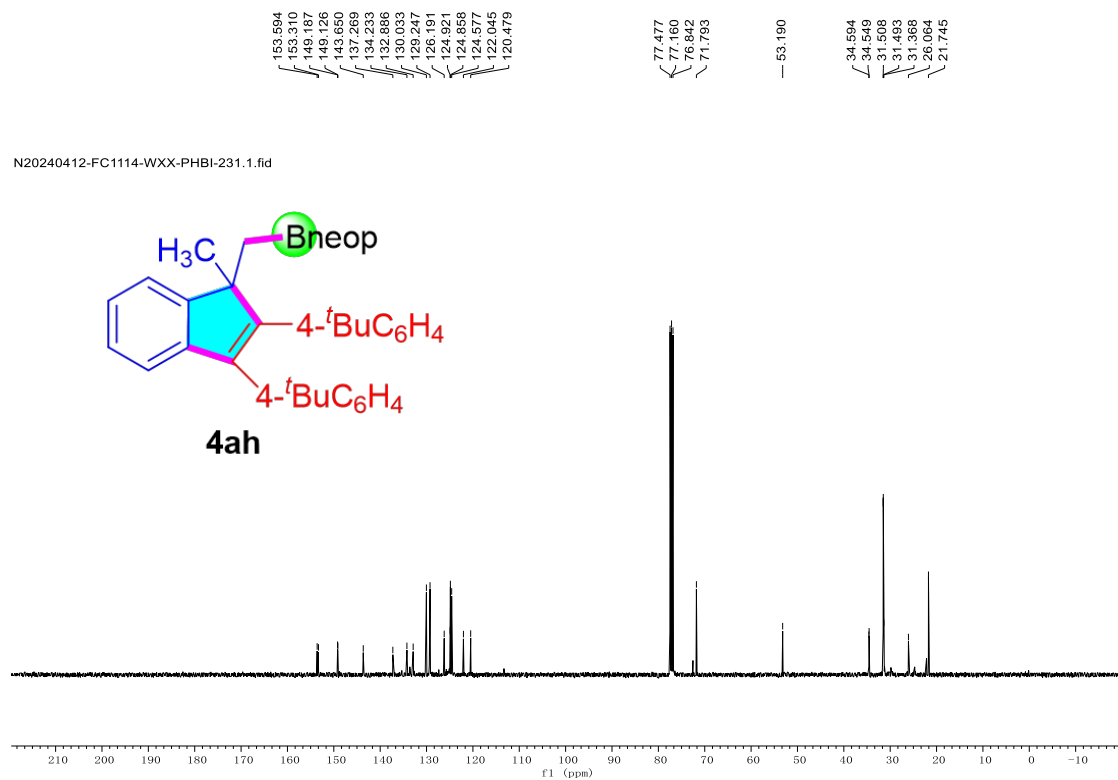

<sup>1</sup>H NMR (400 MHz, CDCl<sub>3</sub>) Spectrum of **4ai**

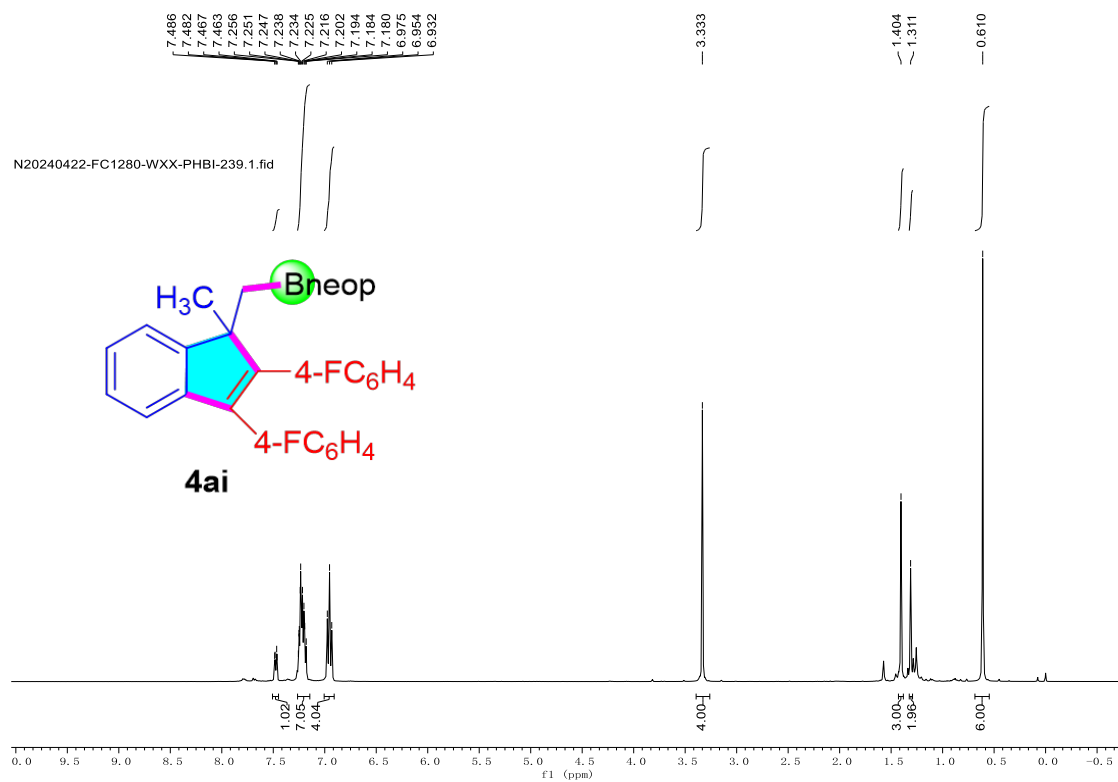

<sup>13</sup>C{<sup>1</sup>H} NMR (101 MHz, CDCl<sub>3</sub>) Spectrum of **4ai**

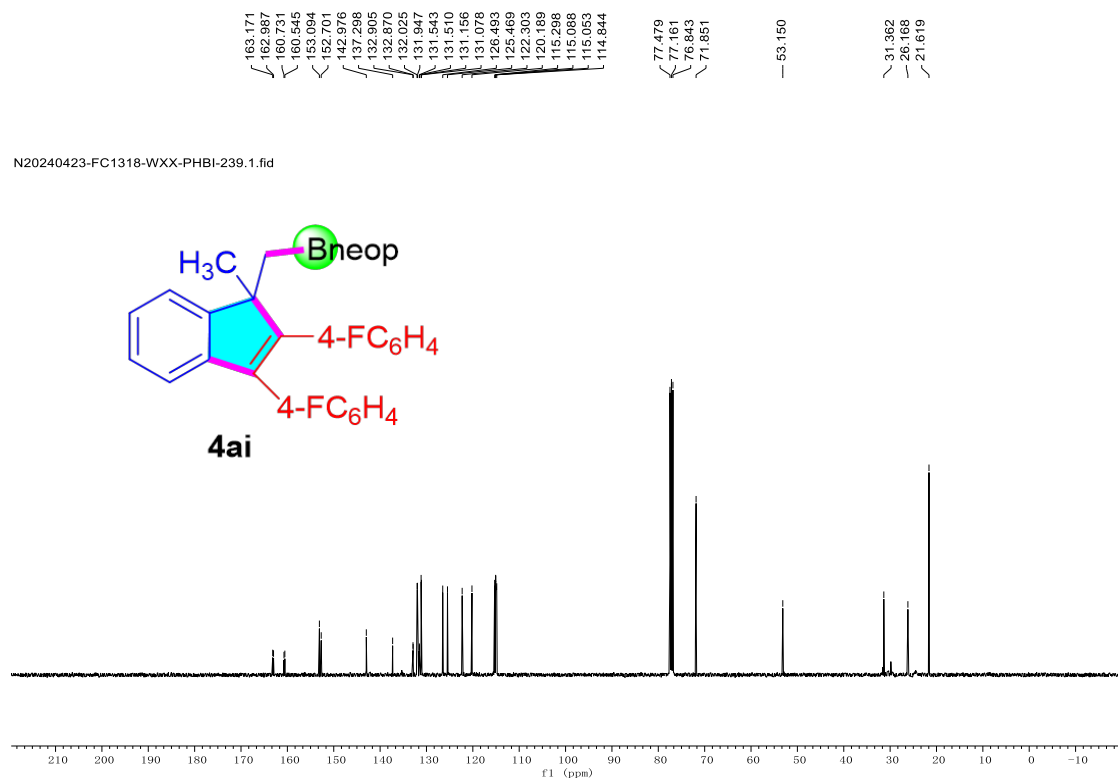

$^{19}\text{F}$  NMR (376 MHz,  $\text{CDCl}_3$ ) Spectrum of **4ai**

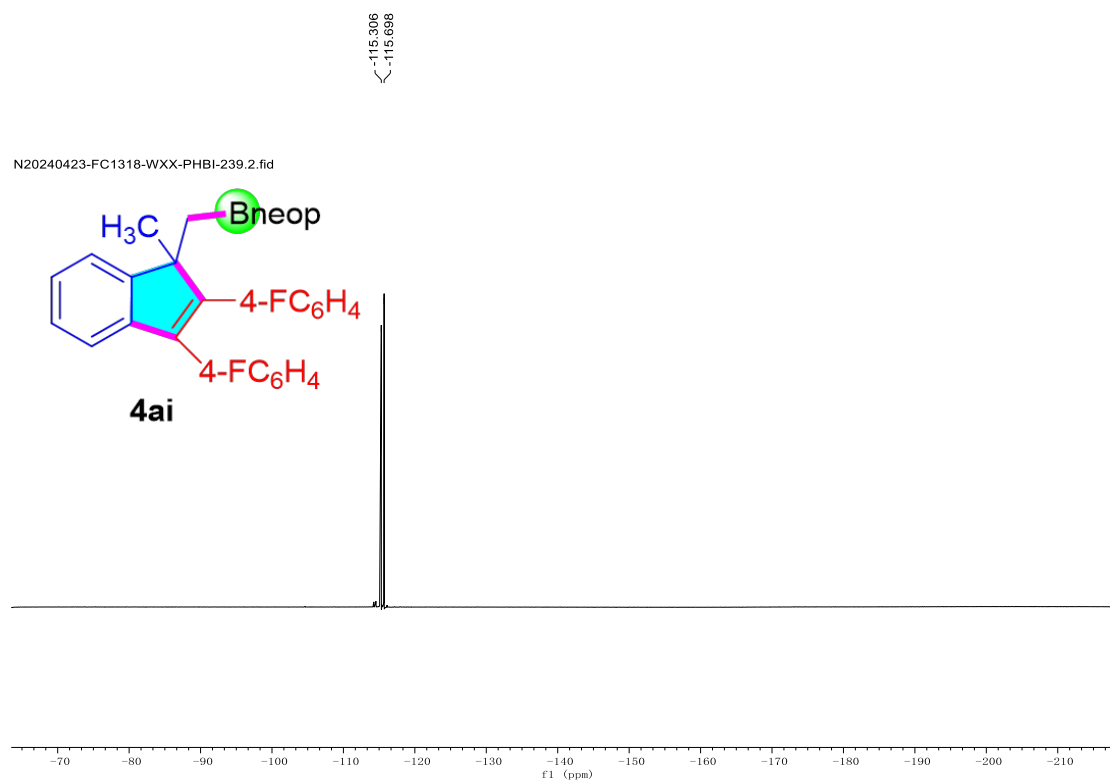



# <sup>1</sup>H NMR (400 MHz, CDCl<sub>3</sub>) Spectrum of 4aj

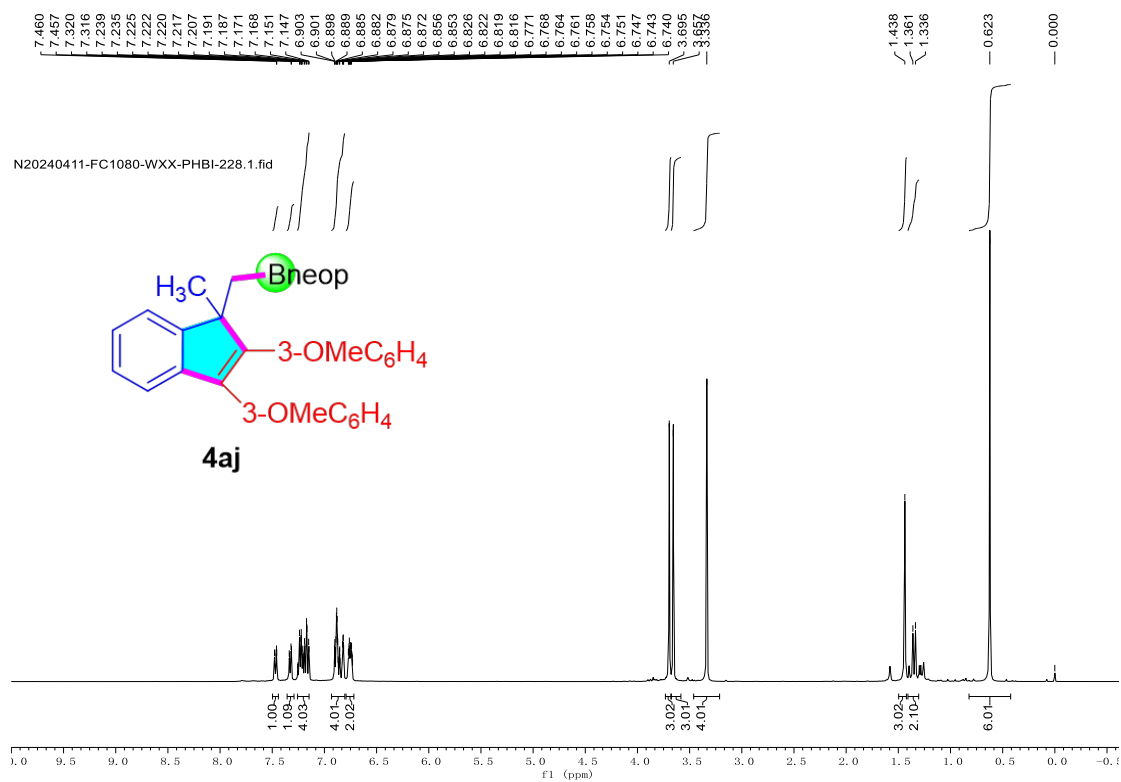

# <sup>13</sup>C{<sup>1</sup>H} NMR (101 MHz, CDCl<sub>3</sub>) Spectrum of 4aj

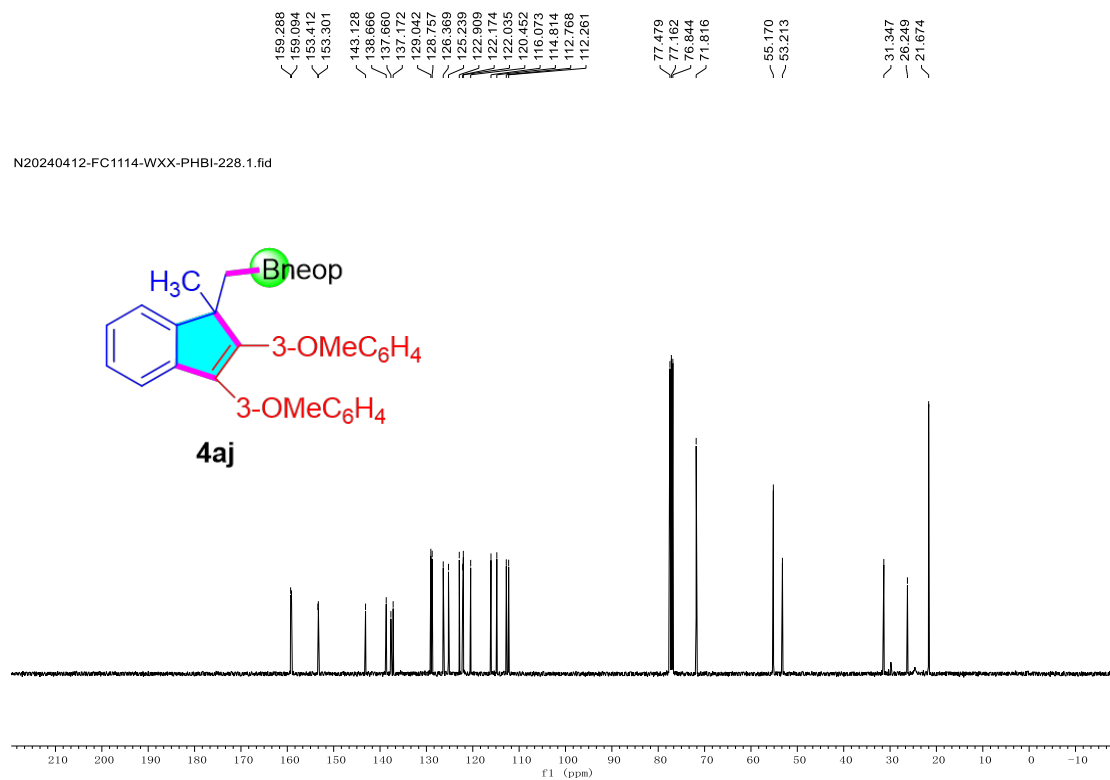

<sup>1</sup>H NMR (400 MHz, CDCl<sub>3</sub>) Spectrum of **4ak**

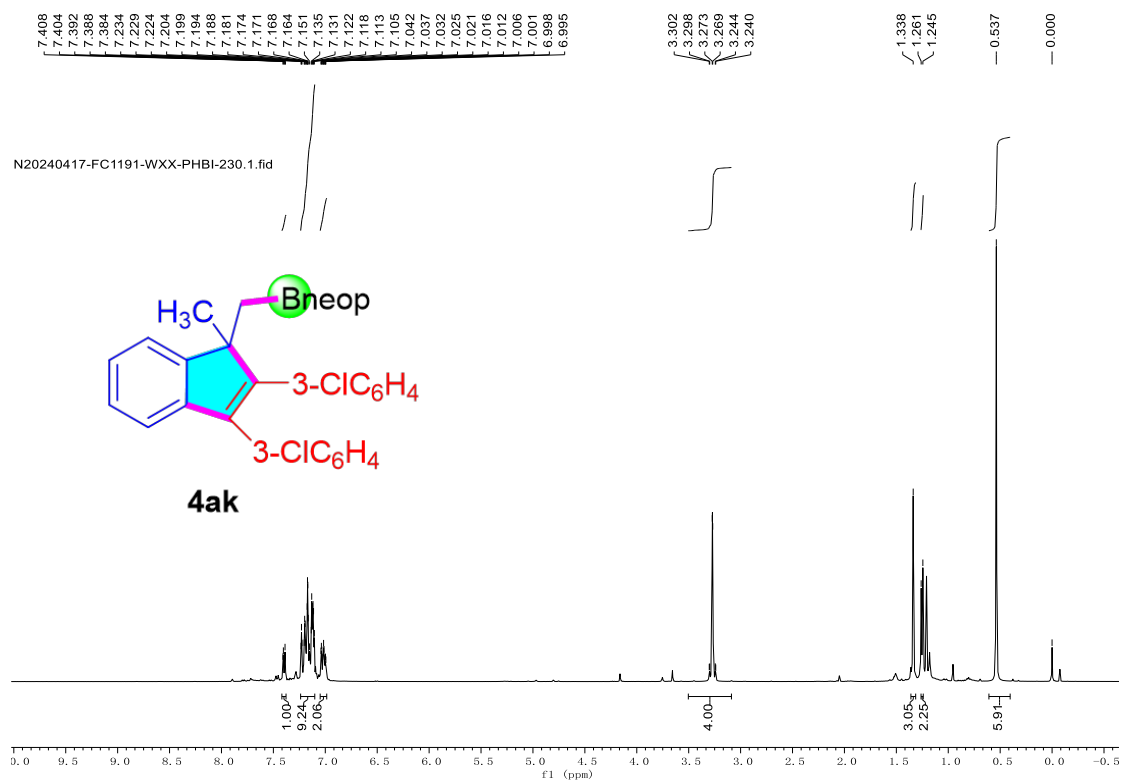

<sup>13</sup>C {<sup>1</sup>H} NMR (101 MHz, CDCl<sub>3</sub>) Spectrum of **4ak**

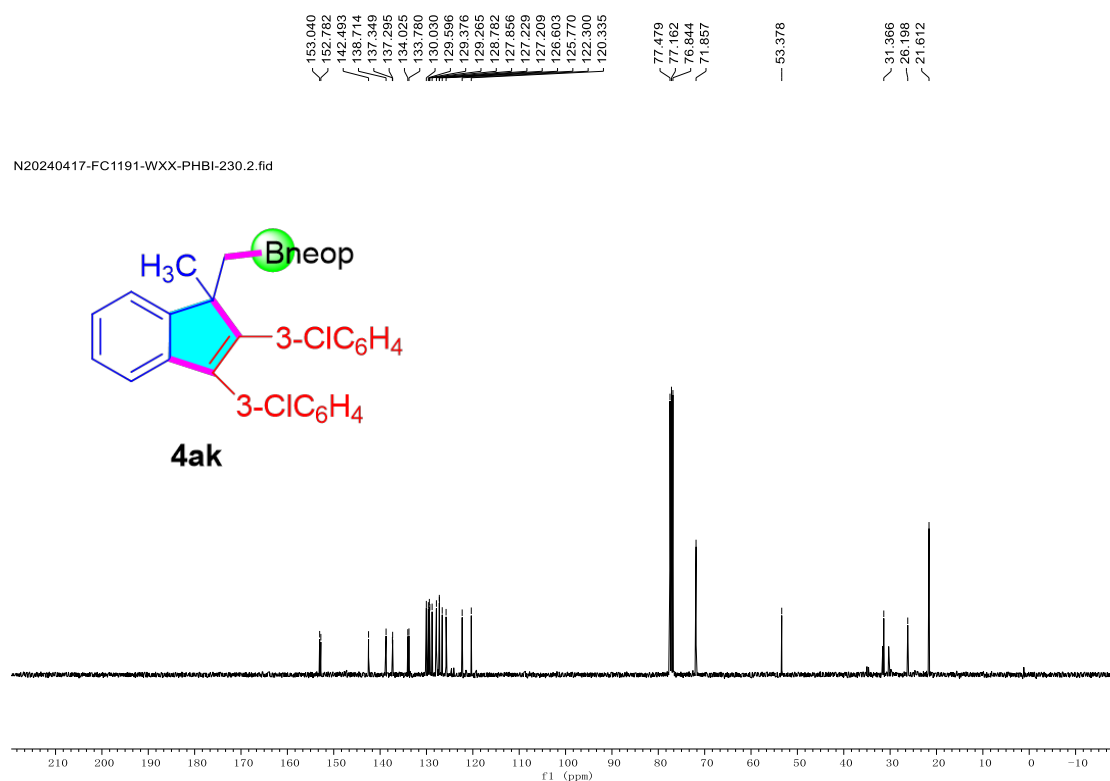

### <sup>1</sup>H NMR (400 MHz, CDCl<sub>3</sub>) Spectrum of **4al**

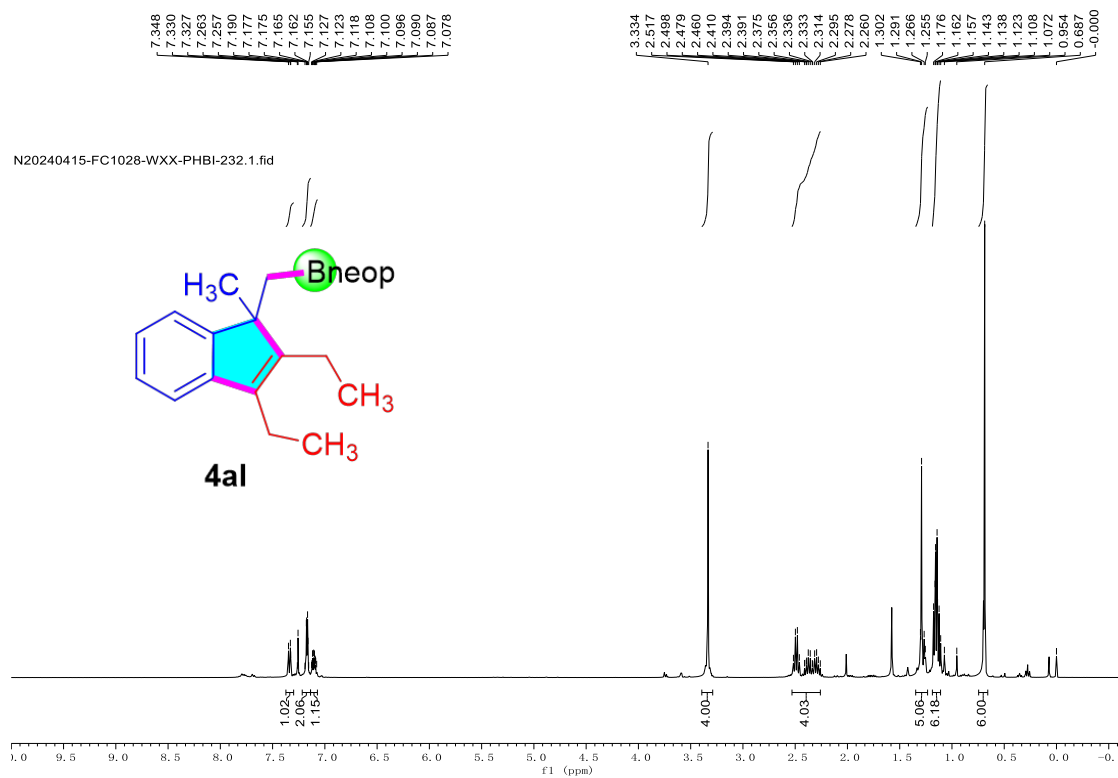

### <sup>13</sup>C{<sup>1</sup>H} NMR (101 MHz, CDCl<sub>3</sub>) Spectrum of **4al**

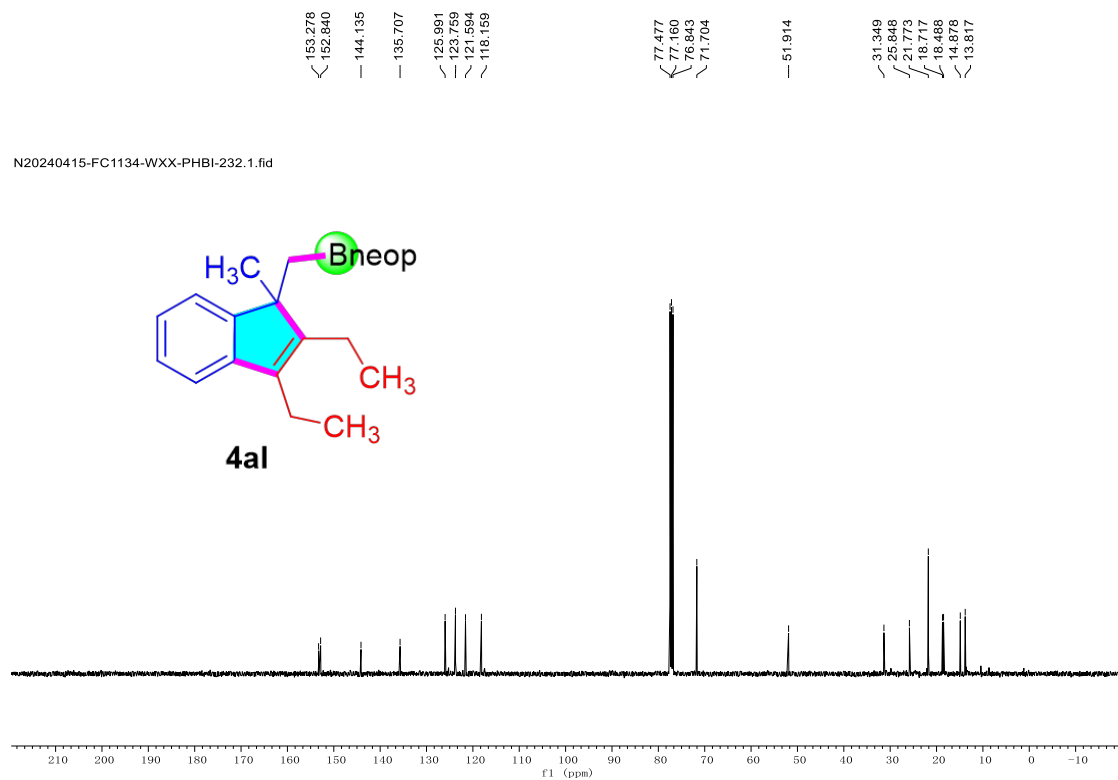

$^1\text{H}$  NMR (400 MHz,  $\text{CDCl}_3$ ) Spectrum of **5a**

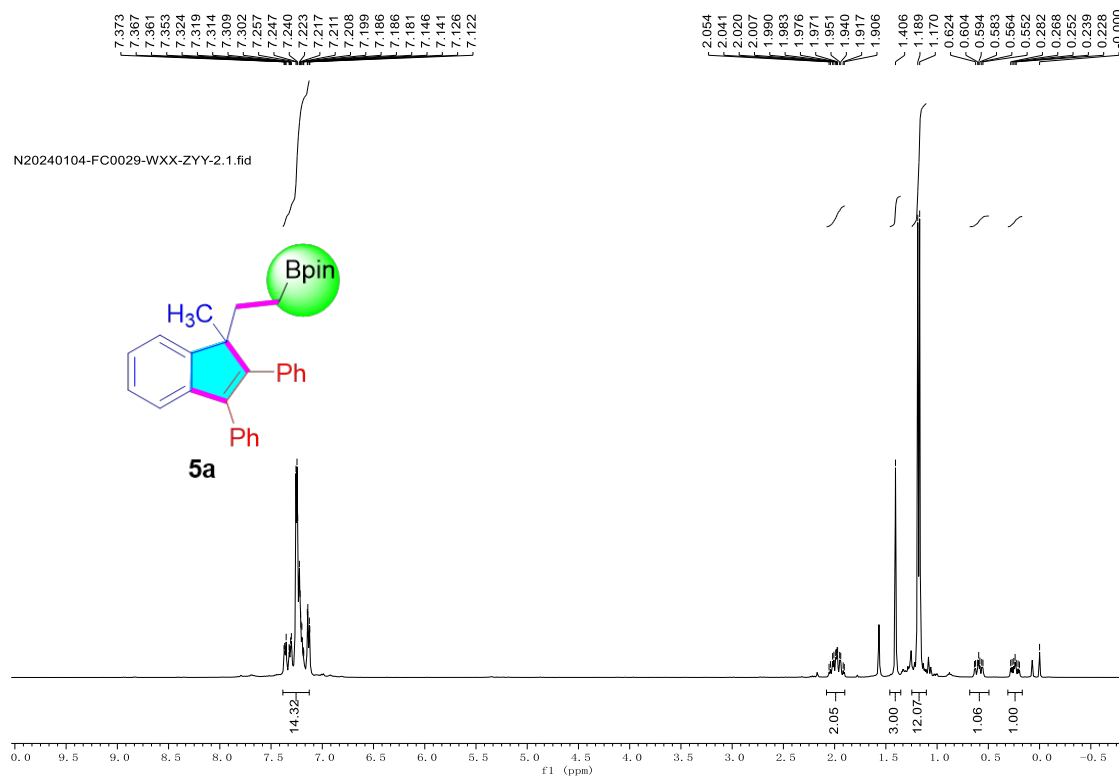

$^{13}\text{C}\{^1\text{H}\}$  NMR (101 MHz,  $\text{CDCl}_3$ ) Spectrum of **5a**

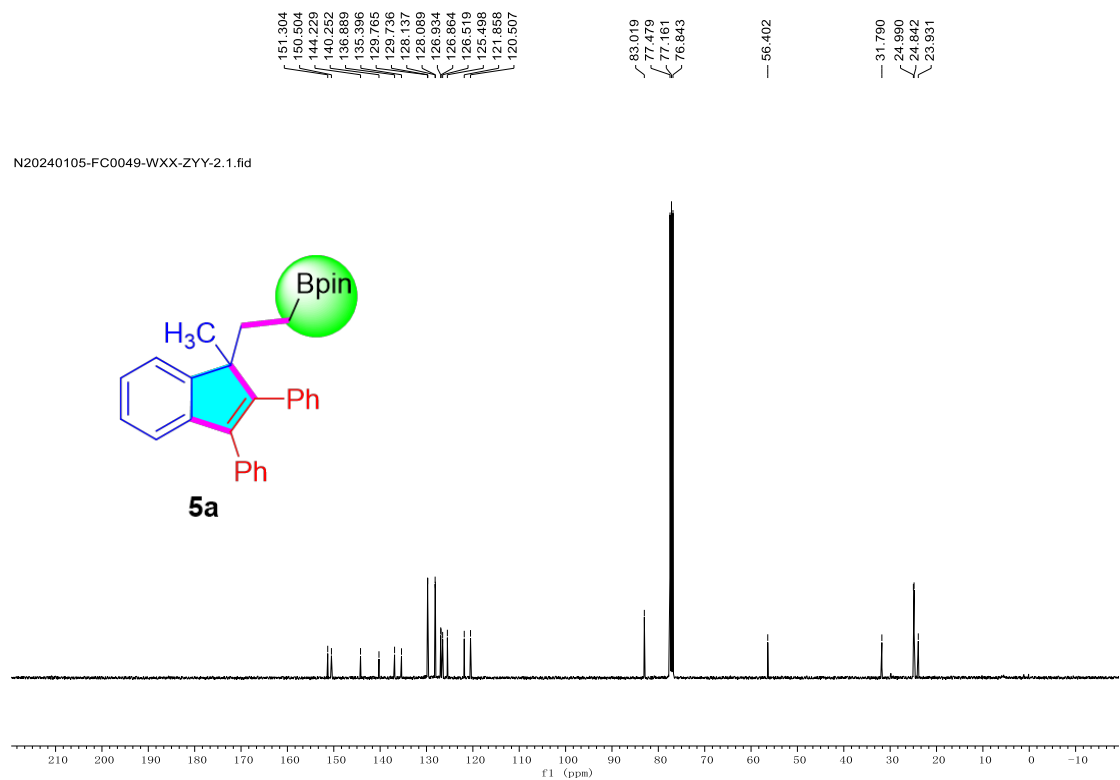

# <sup>1</sup>H NMR (400 MHz, CDCl<sub>3</sub>) Spectrum of **5b**

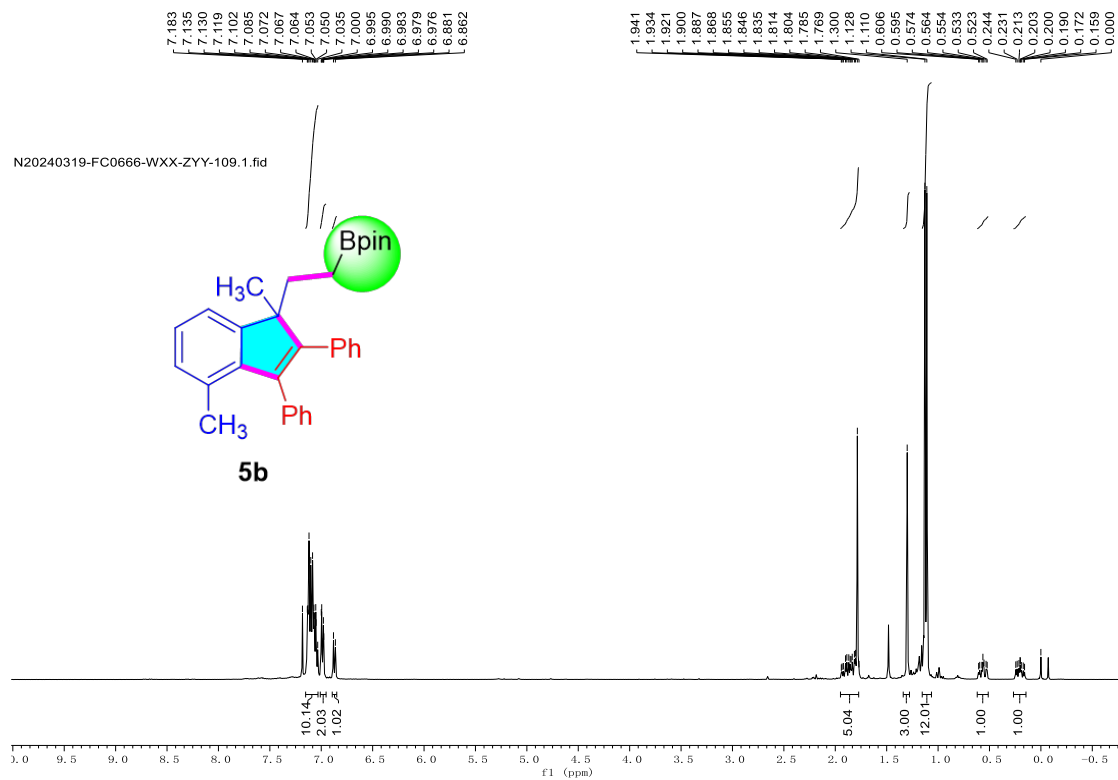

# <sup>13</sup>C{<sup>1</sup>H} NMR (101 MHz, CDCl<sub>3</sub>) Spectrum of **5b**

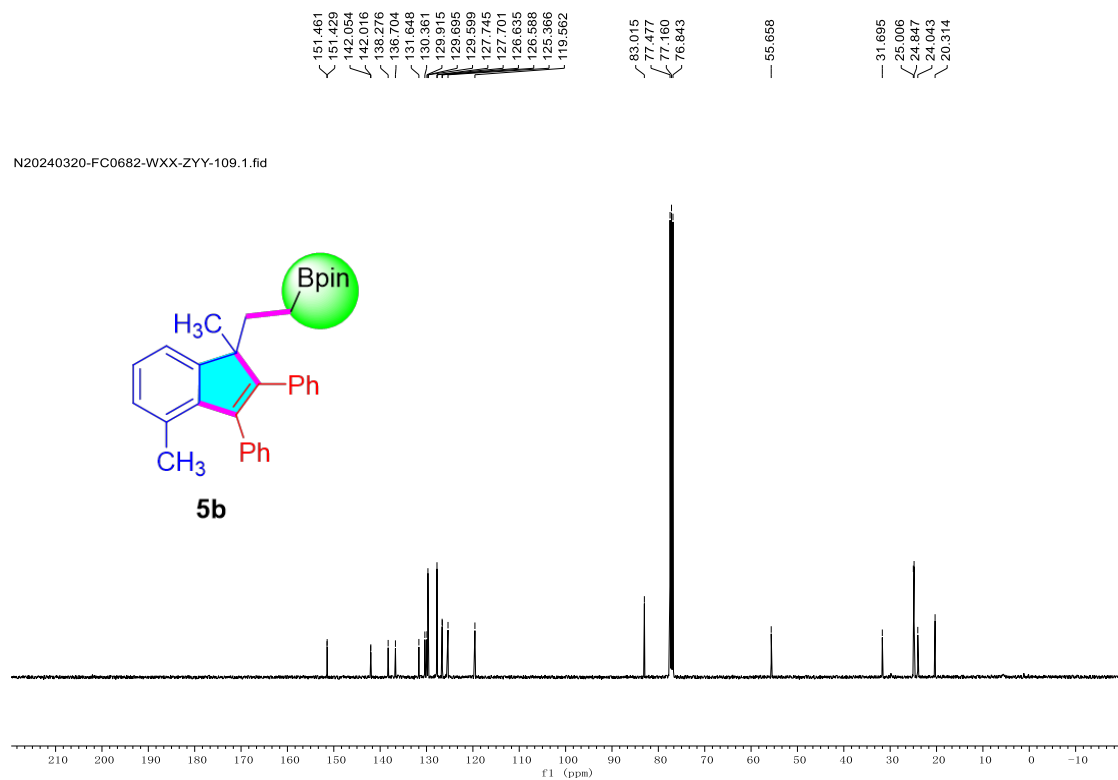

### <sup>1</sup>H NMR (400 MHz, CDCl<sub>3</sub>) Spectrum of **5c**

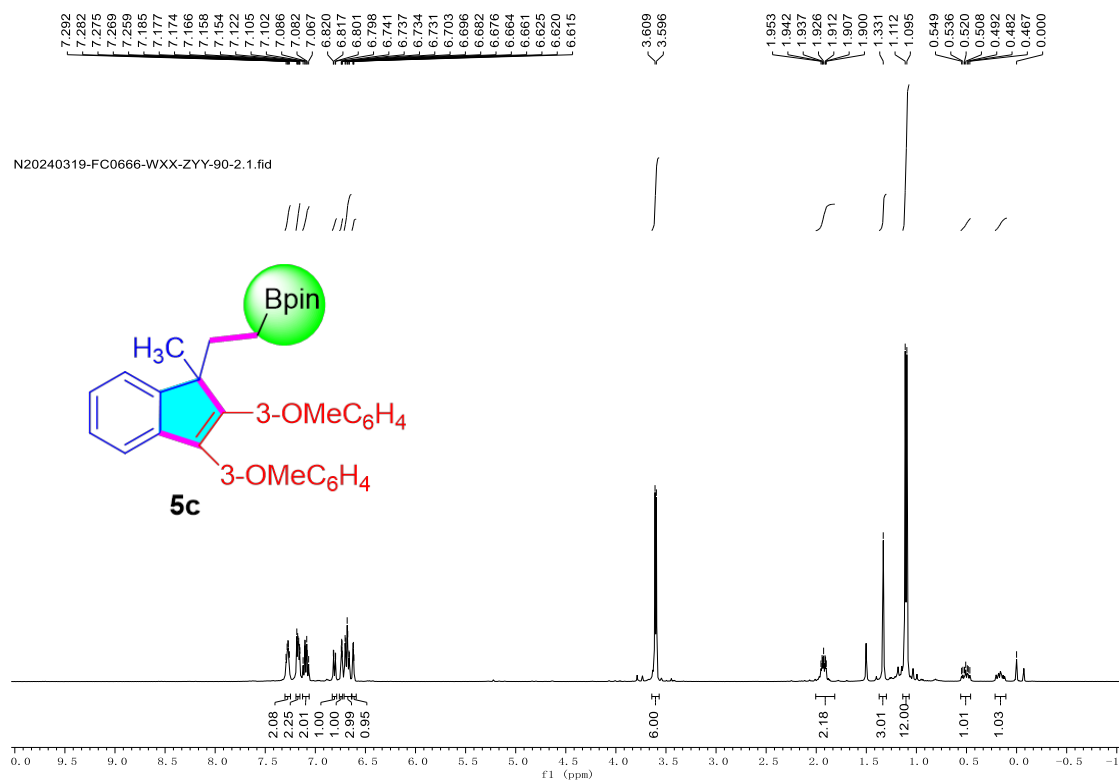

### <sup>13</sup>C{<sup>1</sup>H} NMR (101 MHz, CDCl<sub>3</sub>) Spectrum of **5c**

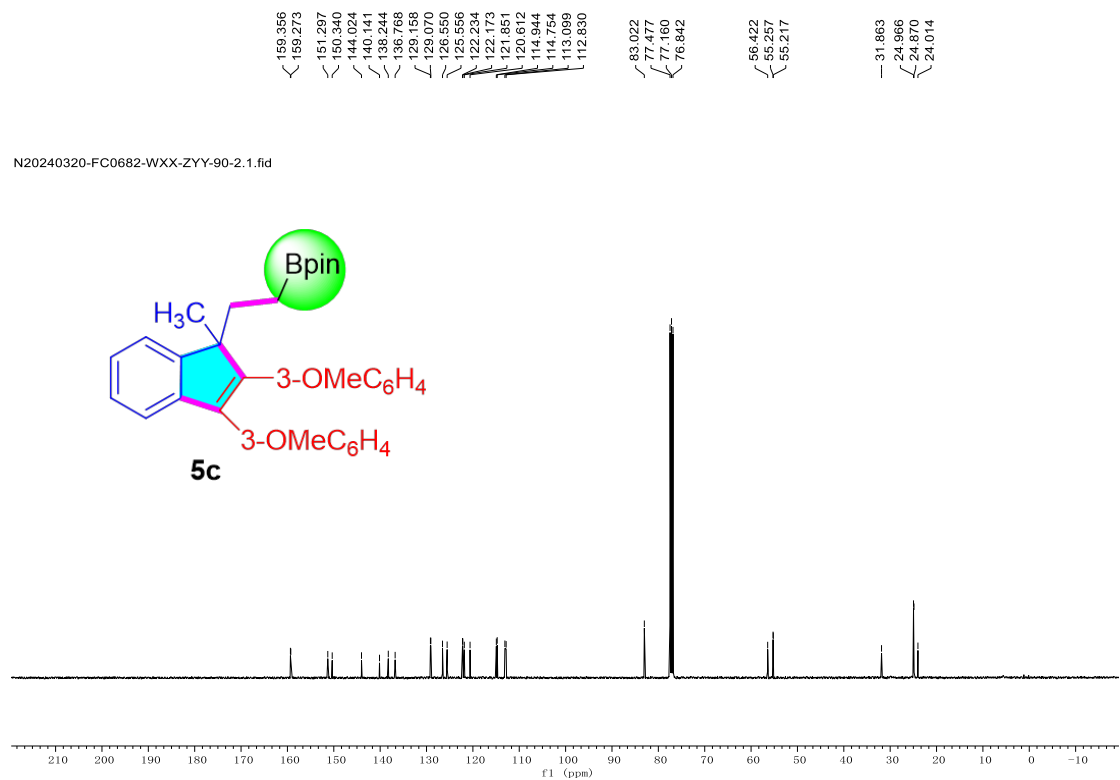

### $^1\text{H}$ NMR (400 MHz, $\text{CDCl}_3$ ) Spectrum of **5d**

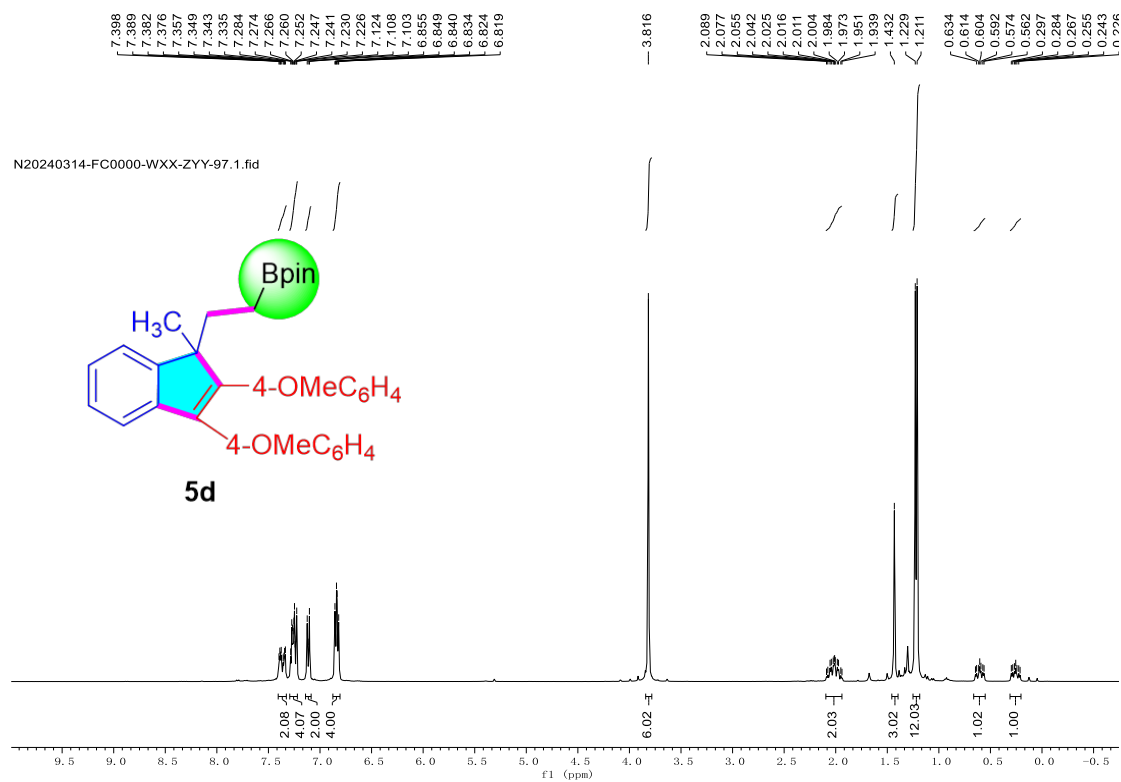

### $^{13}\text{C}\{^1\text{H}\}$ NMR (101 MHz, $\text{CDCl}_3$ ) Spectrum of **5d**

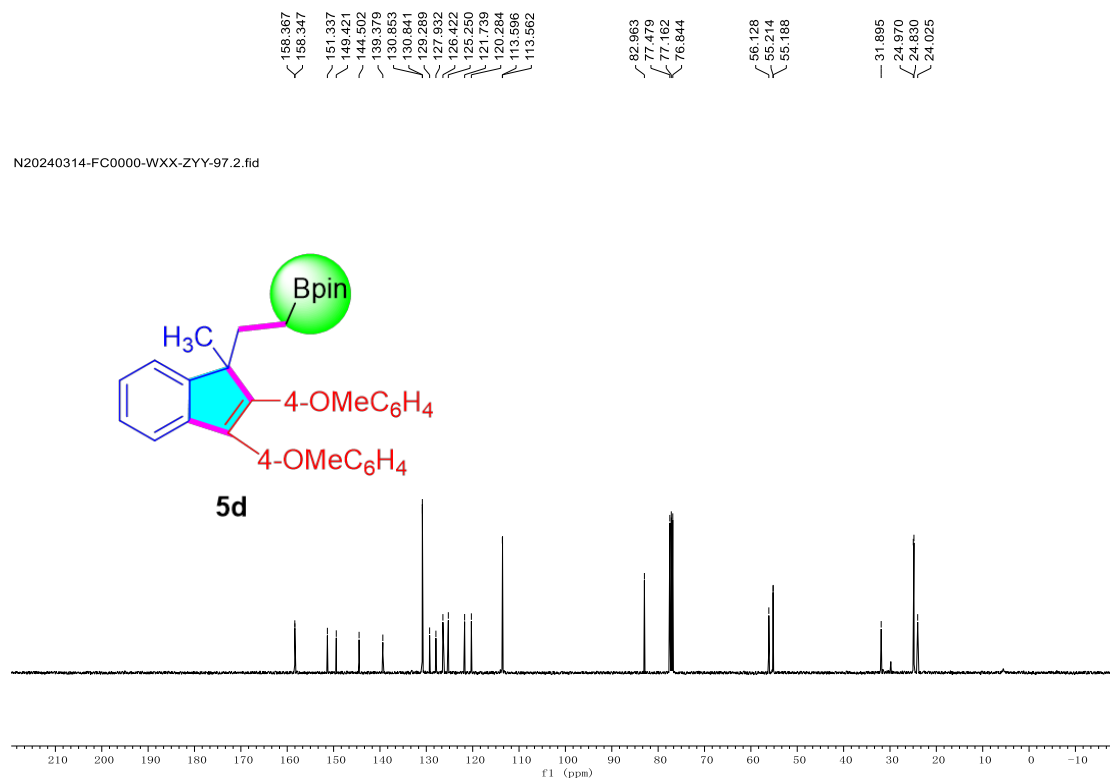

<sup>1</sup>H NMR (400 MHz, CDCl<sub>3</sub>) Spectrum of **6**

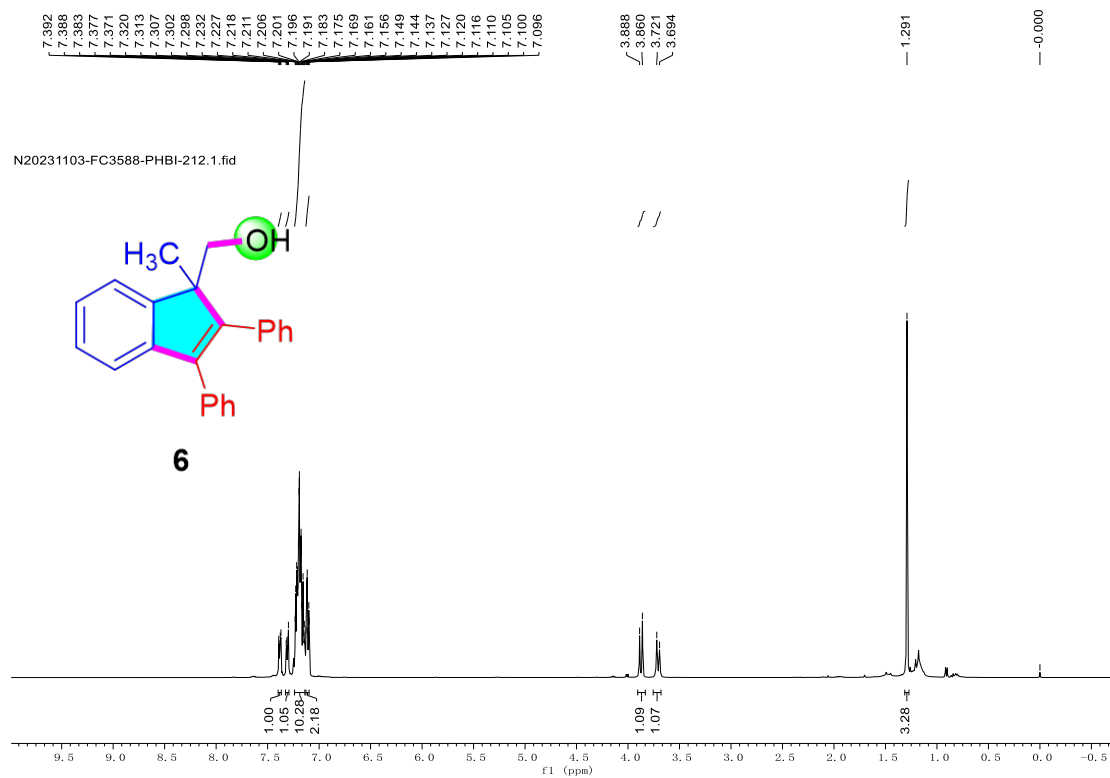

<sup>13</sup>C{<sup>1</sup>H} NMR (101 MHz, CDCl<sub>3</sub>) Spectrum of **6**

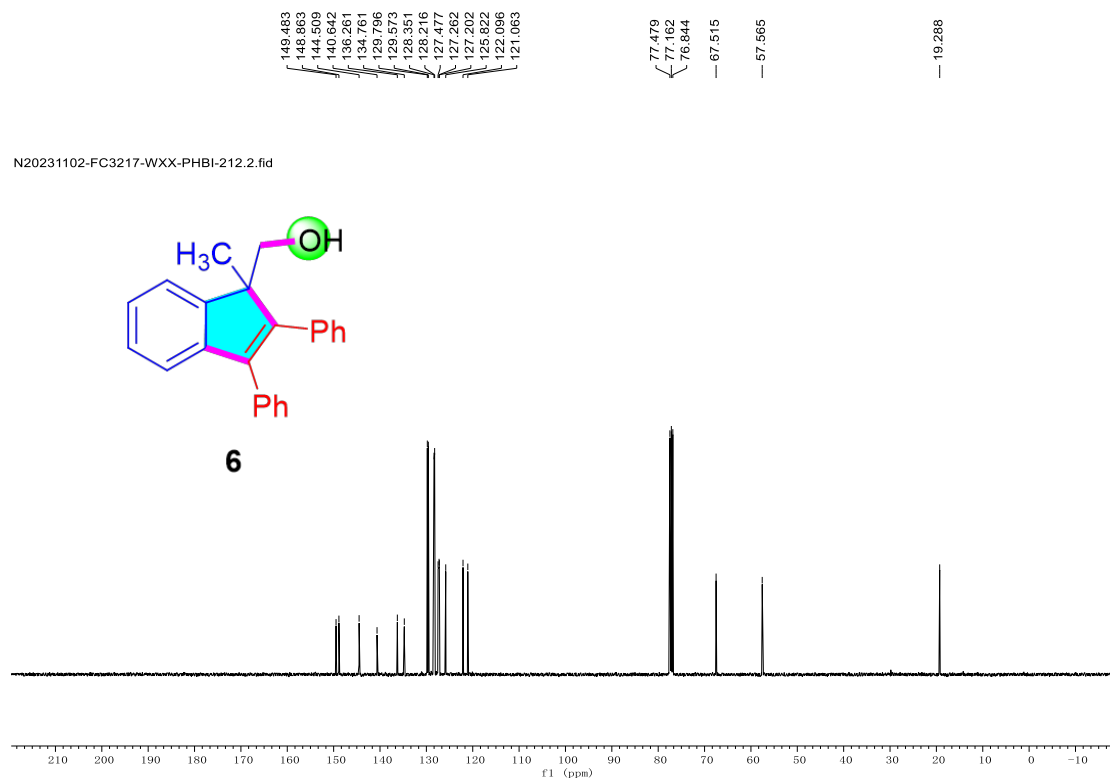



<sup>1</sup>H NMR (400 MHz, CDCl<sub>3</sub>) Spectrum of **7**

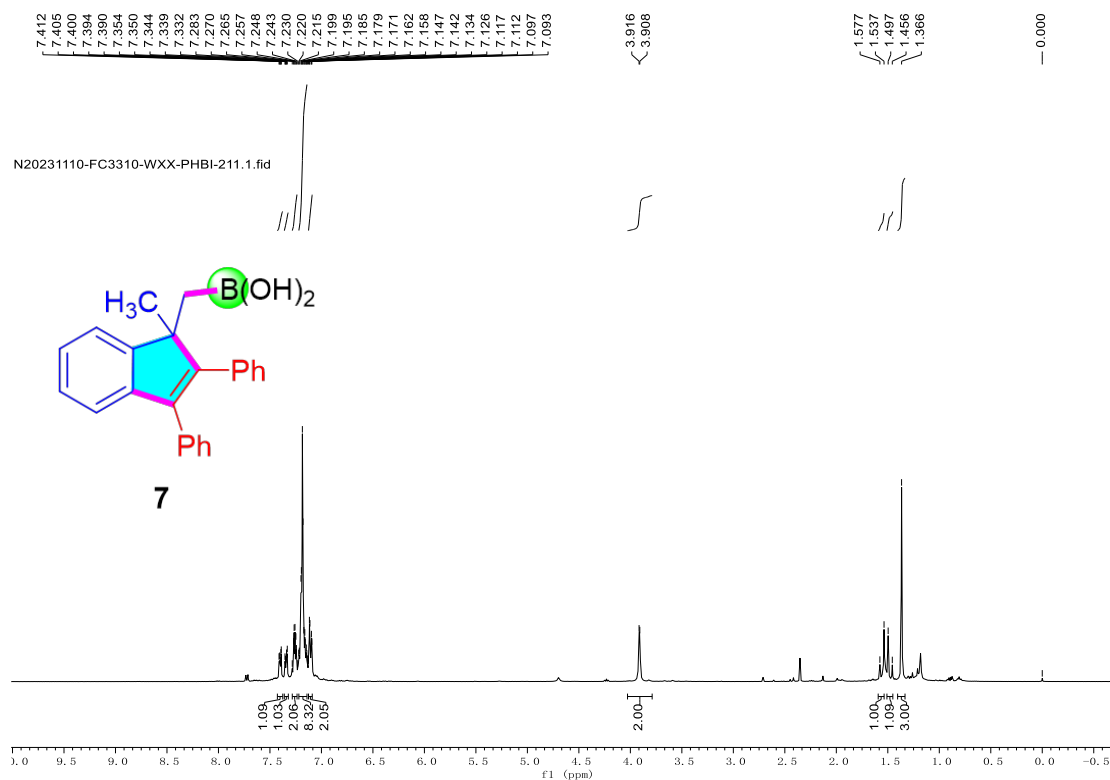

<sup>13</sup>C{<sup>1</sup>H} NMR (101 MHz, CDCl<sub>3</sub>) Spectrum of **7**

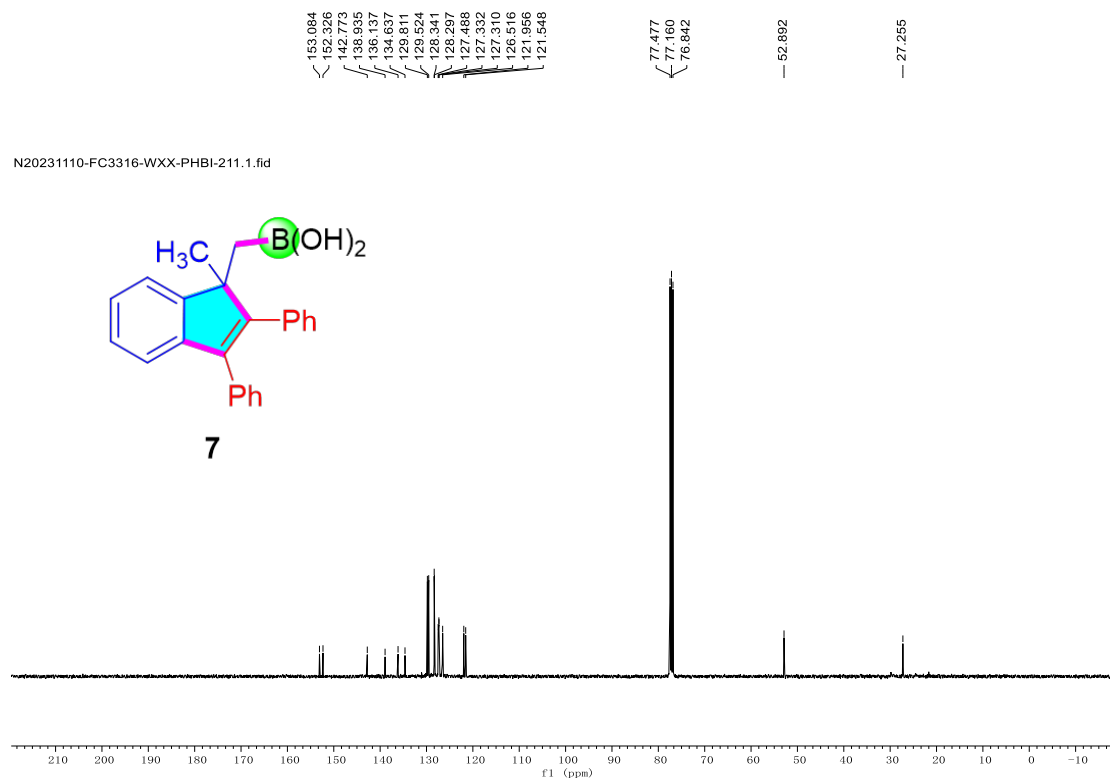

### <sup>1</sup>H NMR (400 MHz, CDCl<sub>3</sub>) Spectrum of **8**

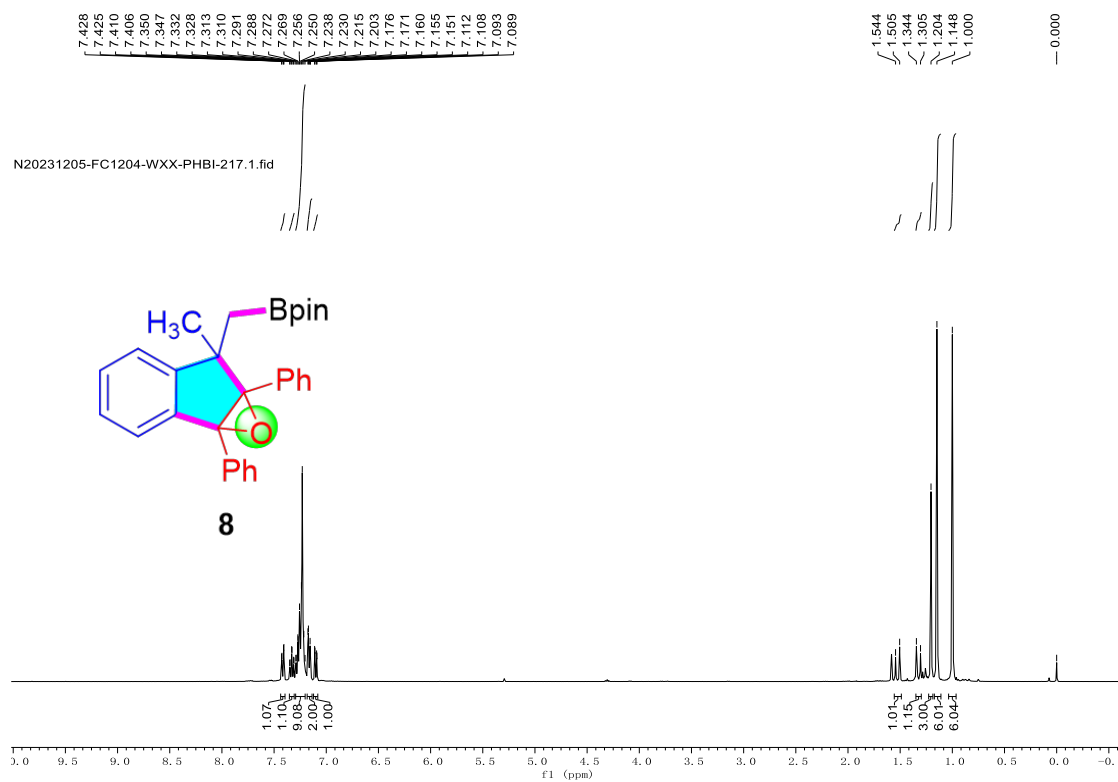

### <sup>13</sup>C{<sup>1</sup>H} NMR (101 MHz, CDCl<sub>3</sub>) Spectrum of **8**

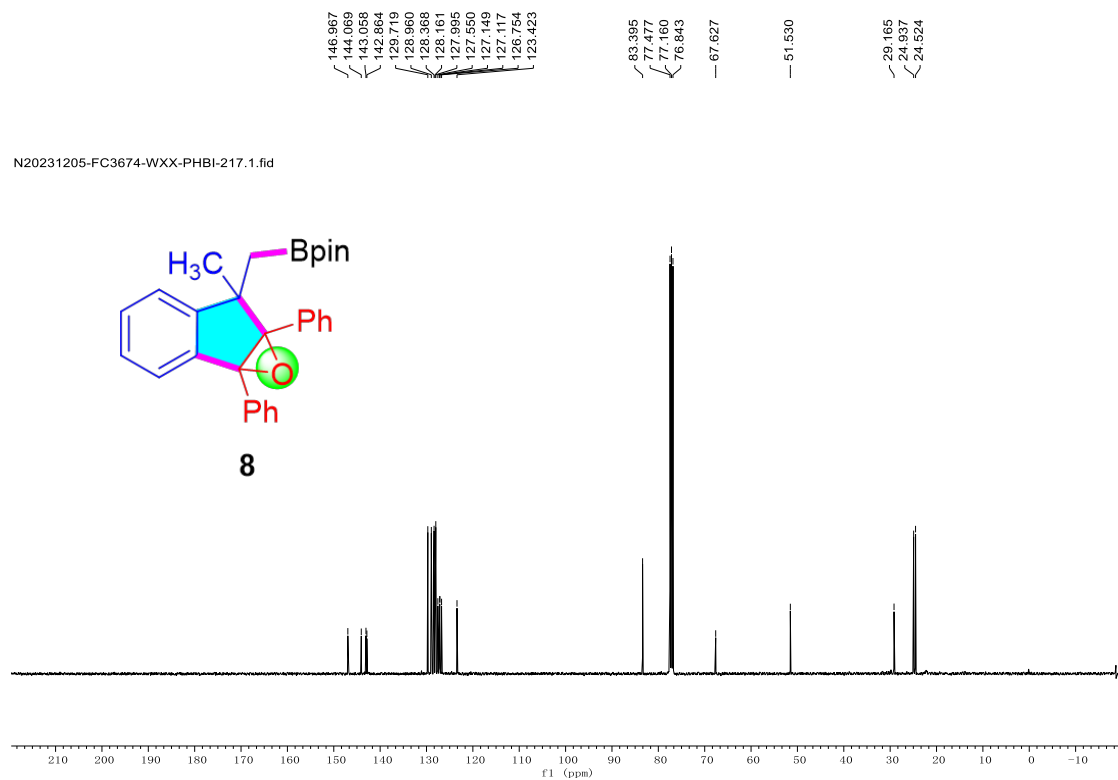

Supplement: d4cc02591a1.pdf [file d4cc02591a1.pdf]
